# Supplementary material for: A Physiologically-Motivated Compartment-Based Model of the Effect of Inhaled Hypertonic Saline on Mucociliary Clearance and Liquid Transport in Cystic Fibrosis
Source: PubMed Central journal article supplement (PMC4226497; doi:10.1371/journal.pone.0111972), 2014-11-10
Supplement: pone.0111972.s003.pdf [file pone.0111972.s003.pdf]

## Whole Lung Tc-SC Counts (CF IS)

| Frame | Patient |       |       |      |        |        |        |        |        |        |        |        |
|-------|---------|-------|-------|------|--------|--------|--------|--------|--------|--------|--------|--------|
|       | 1       | 2     | 3     | 4    | 5      | 6      | 7      | 8      | 9      | 10     | 11     | 12     |
| 1     | 333.9   | 823.8 | 880.0 | 3543 | 1717.7 | 2177.9 | 2468.4 | 2592.5 | 4489.3 | 2256.2 | 6528.4 | 2740.6 |
| 2     | 305.2   | 700.4 | 755.7 | 3356 | 1673.8 | 2017.0 | 2665.4 | 2706.2 | 4531.7 | 2211.9 | 6551.2 | 2552.6 |
| 3     | 324.1   | 868.8 | 835.7 | 3451 | 1621.0 | 2076.8 | 2544.8 | 2660.9 | 4707.7 | 2338.8 | 6437.3 | 2577.5 |
| 4     | 381.4   | 907.2 | 839.0 | 3486 | 1719.5 | 2072.9 | 2565.4 | 2517.8 | 4544.9 | 2272.5 | 6305.7 | 2500.3 |
| 5     | 338.1   | 751.0 | 791.4 | 3313 | 1654.7 | 2121.8 | 2589.4 | 2431.5 | 4676.5 | 2240.1 | 6396.1 | 2572.4 |
| 6     | 347.5   | 728.5 | 838.3 | 3162 | 1683.6 | 2169.6 | 2509.4 | 2444.8 | 4583.3 | 2166.2 | 6129.3 | 2557.4 |
| 7     | 338.8   | 737.7 | 855.2 | 3293 | 1755.4 | 1967.0 | 2440.1 | 2392.8 | 4287.2 | 2092.8 | 6198.5 | 2481.9 |
| 8     | 318.9   | 833.7 | 826.0 | 3330 | 1677.6 | 1941.0 | 2492.0 | 2409.1 | 4357.8 | 2216.1 | 6084.0 | 2394.6 |
| 9     | 361.1   | 683.3 | 876.0 | 3055 | 1667.7 | 2001.6 | 2364.8 | 2388.6 | 4473.4 | 2066.4 | 5953.5 | 2323.1 |
| 10    | 325.1   | 710.1 | 902.0 | 3167 | 1642.7 | 1978.0 | 2246.7 | 2370.2 | 4279.4 | 2164.8 | 5987.5 | 2342.8 |
| 11    | 341.0   | 695.6 | 784.3 | 3019 | 1644.7 | 1902.9 | 2158.9 | 2346.2 | 4193.9 | 2054.0 | 5651.3 | 2479.8 |
| 12    | 342.2   | 628.1 | 879.4 | 3266 | 1745.1 | 1811.6 | 2126.5 | 2304.2 | 4178.9 | 2186.6 | 5531.1 | 2309.8 |
| 13    | 366.6   | 657.1 | 785.7 | 3021 | 1635.5 | 1981.3 | 2244.7 | 2293.6 | 4114.1 | 2043.4 | 5281.1 | 2149.9 |
| 14    | 351.6   | 637.4 | 761.4 | 3218 | 1690.5 | 1877.8 | 2256.8 | 2254.0 | 4214.5 | 2200.2 | 5237.8 | 2306.6 |
| 15    | 313.4   | 658.4 | 778.5 | 3113 | 1673.1 | 1946.2 | 2222.8 | 2298.0 | 4248.1 | 2222.4 | 5268.4 | 2124.6 |
| 16    | 311.4   | 649.2 | 817.4 | 3004 | 1674.0 | 1786.0 | 2134.2 | 2404.3 | 4178.6 | 2150.4 | 5121.0 | 2173.6 |
| 17    | 317.2   | 550.3 | 819.7 | 2973 | 1767.4 | 1978.7 | 2161.6 | 2306.5 | 4172.7 | 2007.1 | 5080.0 | 2064.0 |
| 18    | 296.7   | 617.7 | 799.2 | 3002 | 1686.5 | 1823.2 | 2084.0 | 2263.9 | 4118.2 | 2082.1 | 5102.6 | 2205.2 |
| 19    | 305.7   | 622.5 | 734.9 | 3116 | 1595.4 | 1863.7 | 2180.9 | 2341.9 | 4172.7 | 2150.4 | 5105.4 | 2106.1 |
| 20    | 316.7   | 579.7 | 779.2 | 3102 | 1610.4 | 1847.8 | 2215.7 | 2339.3 | 4282.4 | 2085.4 | 5204.9 | 2186.4 |
| 21    | 310.8   | 618.7 | 754.3 | 2988 | 1618.5 | 1826.4 | 2150.1 | 2333.6 | 4216.9 | 2156.3 | 5072.8 | 2130.8 |
| 22    | 318.4   | 592.3 | 763.6 | 2926 | 1572.8 | 1704.9 | 2150.6 | 2232.8 | 4190.0 | 2163.2 | 5109.8 | 2127.3 |
| 23    | 313.6   | 638.0 | 760.0 | 3020 | 1585.0 | 1818.8 | 2194.6 | 2250.0 | 4202.3 | 2168.4 | 5341.8 | 2170.0 |
| 24    | 282.6   | 562.6 | 793.6 | 2929 | 1574.5 | 1832.5 | 2208.4 | 2353.0 | 4306.9 | 2080.7 | 4875.2 | 1987.8 |
| 25    | 381.5   | 564.0 | 766.4 | 3002 | 1640.7 | 1834.7 | 2121.5 | 2199.9 | 4107.8 | 2135.6 | 4883.8 | 2111.8 |
| 26    | 250.0   | 636.4 | 765.9 | 2817 | 1543.8 | 1834.4 | 2138.7 | 2171.0 | 4219.1 | 2065.0 | 4866.3 | 2200.7 |
| 27    | 327.1   | 601.6 | 777.9 | 3012 | 1633.4 | 1772.6 | 2024.8 | 2341.3 | 4342.9 | 2199.0 | 4955.6 | 2080.8 |
| 28    | 328.1   | 573.8 | 840.2 | 2955 | 1634.1 | 1781.5 | 2038.8 | 2271.1 | 4185.0 | 2119.2 | 4977.4 | 2097.1 |
| 29    | 303.9   | 533.4 | 819.2 | 2942 | 1660.1 | 1786.9 | 2216.3 | 2152.3 | 4180.6 | 2115.7 | 4899.9 | 2133.2 |
| 30    | 275.6   | 546.3 | 715.5 | 2941 | 1603.3 | 1820.1 | 1979.1 | 2190.2 | 4216.4 | 2104.3 | 5014.1 | 2038.3 |
| 31    | 350.7   | 604.1 | 784.3 | 2911 | 1636.0 | 1786.3 | 2131.1 | 2334.2 | 4188.9 | 2081.0 | 4883.1 | 2105.6 |
| 32    | 347.3   | 577.7 | 734.4 | 2956 | 1483.0 | 1677.5 | 2043.2 | 2354.5 | 4159.8 | 2245.4 | 4826.3 | 2073.1 |
| 33    | 287.7   | 578.1 | 812.9 | 2798 | 1675.1 | 1828.6 | 1980.9 | 2240.3 | 4319.3 | 2036.0 | 5014.4 | 2146.0 |
| 34    | 366.9   | 534.7 | 795.5 | 2816 | 1583.8 | 1809.7 | 2158.7 | 2314.3 | 4340.7 | 2097.9 | 4997.0 | 2034.5 |
| 35    | 361.2   | 565.7 | 815.9 | 2797 | 1625.3 | 1740.0 | 1990.1 | 2310.7 | 4107.1 | 2063.7 | 5088.6 | 2069.8 |
| 36    | 329.2   | 587.0 | 749.9 | 2844 | 1462.9 | 1823.1 | 2056.2 | 2443.0 | 4490.3 | 2027.1 | 4842.6 | 1914.0 |
| 37    | 334.7   | 541.9 | 697.5 | 2938 | 1561.2 | 1759.7 | 2006.2 | 2229.2 | 4176.2 | 1984.5 | 4819.1 | 2139.8 |
| 38    | 338.0   | 520.6 | 799.0 | 2725 | 1600.7 | 1818.5 | 2058.1 | 2473.6 | 4275.3 | 2022.7 | 4796.1 | 1974.7 |
| 39    | 313.2   | 533.5 | 785.2 | 2854 | 1604.7 | 1782.9 | 2099.4 | 2385.7 | 4225.5 | 1923.7 | 4873.3 | 2053.5 |
| 40    | 342.8   | 575.6 | 779.6 | 2776 | 1647.6 | 1732.3 | 2089.5 | 2382.7 | 4329.5 | 1952.1 | 4962.3 | 2076.3 |

|    |       |       |       |      |        |        |        |        |        |        |        |        |
|----|-------|-------|-------|------|--------|--------|--------|--------|--------|--------|--------|--------|
| 41 | 291.7 | 518.5 | 725.5 | 2800 | 1644.7 | 1777.5 | 1930.6 | 2377.4 | 4223.8 | 2037.0 | 4782.2 | 2064.2 |
| 42 | 282.5 | 577.9 | 698.1 | 2770 | 1656.1 | 1820.6 | 2025.4 | 2313.4 | 4107.7 | 2017.8 | 4806.4 | 1990.3 |
| 43 | 326.6 | 595.6 | 724.5 | 2695 | 1639.5 | 1759.7 | 2073.3 | 2354.0 | 4294.8 | 1923.4 | 5067.1 | 1991.7 |
| 44 | 361.2 | 538.8 | 717.1 | 2701 | 1564.6 | 1732.7 | 1987.9 | 2301.3 | 4205.2 | 1895.0 | 4936.6 | 2056.9 |
| 45 | 301.4 | 567.3 | 741.0 | 2692 | 1604.3 | 1773.1 | 2072.6 | 2225.3 | 4220.3 | 1972.5 | 4816.2 | 1904.5 |
| 46 | 236.3 | 485.6 | 765.4 | 2949 | 1616.9 | 1761.6 | 2142.7 | 2364.7 | 4263.2 | 2015.1 | 4913.2 | 2005.9 |
| 47 | 278.6 | 546.0 | 726.2 | 2699 | 1582.6 | 1833.8 | 1921.4 | 2226.4 | 4332.3 | 2052.6 | 4712.0 | 1978.1 |
| 48 | 295.9 | 516.6 | 698.2 | 2777 | 1554.1 | 1746.9 | 1985.6 | 2443.9 | 4224.8 | 1907.6 | 4922.7 | 1830.1 |
| 49 | 292.5 | 559.8 | 761.3 | 2656 | 1557.6 | 1797.4 | 2116.5 | 2380.4 | 4258.0 | 1995.7 | 4894.7 | 1879.8 |
| 50 | 298.0 | 543.9 | 725.4 | 2696 | 1604.2 | 1690.0 | 2100.7 | 2460.8 | 4374.9 | 1908.9 | 4926.6 | 1870.7 |
| 51 | 299.6 | 560.7 | 739.1 | 2655 | 1542.8 | 1634.7 | 2029.7 | 2346.7 | 4205.1 | 1999.2 | 4823.8 | 2022.2 |
| 52 | 249.9 | 483.8 | 718.7 | 2511 | 1604.6 | 1840.5 | 2000.5 | 2265.6 | 4409.1 | 1979.3 | 4934.5 | 1977.5 |
| 53 | 315.8 | 481.0 | 685.5 | 2573 | 1538.1 | 1755.0 | 2010.2 | 2238.6 | 4230.6 | 1785.5 | 4783.7 | 1984.6 |
| 54 | 299.8 | 539.8 | 618.8 | 2472 | 1601.6 | 1786.8 | 2004.0 | 2353.3 | 4140.5 | 1977.7 | 4660.8 | 1864.9 |
| 55 | 309.8 | 476.4 | 694.1 | 2516 | 1570.7 | 1812.5 | 2025.7 | 2457.6 | 4111.4 | 1751.0 | 4703.1 | 1950.2 |
| 56 | 250.6 | 497.1 | 672.0 | 2473 | 1609.4 | 1667.4 | 1916.3 | 2287.1 | 4165.3 | 1954.9 | 4660.5 | 1909.8 |
| 57 | 329.9 | 561.7 | 696.7 | 2468 | 1556.6 | 1797.7 | 1975.8 | 2410.7 | 4019.8 | 1873.2 | 4620.6 | 1989.4 |
| 58 | 345.7 | 428.2 | 702.2 | 2490 | 1497.4 | 1852.8 | 2034.6 | 2375.0 | 4263.4 | 1758.7 | 4541.7 | 2073.4 |
| 59 | 304.3 | 424.6 | 698.5 | 2529 | 1630.0 | 1616.3 | 2024.6 | 2275.9 | 4119.5 | 1808.7 | 4404.0 | 1912.8 |
| 60 | 206.0 | 442.6 | 733.5 | 2552 | 1610.2 | 1650.7 | 2136.5 | 2295.1 | 4230.0 | 1927.7 | 4605.0 | 1983.0 |
| 61 | 280.6 | 436.9 | 695.8 | 2633 | 1573.0 | 1691.4 | 1999.9 | 2392.6 | 4341.8 | 1865.6 | 4431.2 | 2012.7 |
| 62 | 330.9 | 471.7 | 728.5 | 2497 | 1465.1 | 1790.7 | 2032.6 | 2321.7 | 4589.8 | 1823.1 | 4671.6 | 1842.6 |
| 63 | 256.1 | 493.8 | 735.0 | 2555 | 1501.1 | 1643.7 | 2011.5 | 2337.9 | 4396.7 | 1902.1 | 4570.5 | 1986.9 |
| 64 | 271.0 | 467.7 | 665.1 | 2413 | 1485.6 | 1722.9 | 1911.1 | 2489.5 | 4247.7 | 1924.4 | 4552.2 | 1878.5 |
| 65 | 248.3 | 429.8 | 658.2 | 2327 | 1565.1 | 1738.6 | 1915.3 | 2201.4 | 4431.1 | 1788.2 | 4649.1 | 1989.4 |
| 66 | 271.7 | 492.1 | 689.7 | 2364 | 1616.4 | 1589.8 | 2013.3 | 2385.7 | 4289.3 | 1942.5 | 4470.6 | 1950.7 |
| 67 | 241.5 | 393.6 | 598.6 | 2411 | 1563.6 | 1663.5 | 2104.6 | 2380.9 | 4403.0 | 1695.1 | 4654.0 | 1819.0 |
| 68 | 276.0 | 496.1 | 693.7 | 2474 | 1564.6 | 1724.1 | 2003.7 | 2222.0 | 4270.6 | 1688.5 | 4570.8 | 1932.5 |
| 69 | 323.7 | 497.0 | 639.8 | 2334 | 1637.5 | 1803.7 | 1938.3 | 2427.4 | 4327.4 | 1822.8 | 4668.1 | 1922.1 |
| 70 | 271.5 | 489.1 | 715.0 | 2464 | 1484.1 | 1585.5 | 1993.6 | 2352.2 | 4372.0 | 1786.5 | 4686.3 | 1835.6 |
| 71 | 315.5 | 504.0 | 757.9 | 2233 | 1521.8 | 1681.7 | 1997.6 | 2277.0 | 4187.6 | 1859.8 | 4635.9 | 1951.0 |
| 72 | 275.9 | 462.3 | 674.9 | 2399 | 1621.5 | 1671.9 | 1992.0 | 2297.0 | 4318.1 | 1789.1 | 4611.2 | 1735.7 |
| 73 | 249.9 | 541.3 | 675.2 | 2358 | 1524.9 | 1700.7 | 2145.5 | 2280.6 | 4426.4 | 1813.0 | 4677.6 | 1941.2 |
| 74 | 278.8 | 516.6 | 723.8 | 2276 | 1567.5 | 1693.3 | 2020.3 | 2336.4 | 4182.1 | 1674.5 | 4405.6 | 2015.7 |
| 75 | 329.0 | 523.1 | 728.2 | 2289 | 1580.0 | 1591.5 | 1977.8 | 2318.6 | 4267.1 | 1716.3 | 4673.3 | 1945.9 |
| 76 | 293.9 | 433.9 | 627.4 | 2174 | 1573.8 | 1665.2 | 2008.4 | 2326.4 | 4193.9 | 1738.7 | 4454.8 | 1872.5 |
| 77 | 276.1 | 482.1 | 698.0 | 2194 | 1475.2 | 1646.1 | 1939.8 | 2398.1 | 4174.7 | 1639.3 | 4642.7 | 1880.4 |
| 78 | 270.5 | 498.7 | 643.9 | 2289 | 1634.8 | 1621.0 | 1981.2 | 2325.8 | 4148.5 | 1747.3 | 4638.0 | 1837.9 |
| 79 | 210.6 | 471.7 | 664.9 | 2250 | 1578.3 | 1569.7 | 1973.5 | 2198.8 | 4147.8 | 1738.6 | 4678.4 | 1829.6 |
| 80 | 241.9 | 486.6 | 680.4 | 2260 | 1622.6 | 1644.7 | 2004.7 | 2353.3 | 4147.1 | 1641.3 | 4676.5 | 1979.7 |

Central Lung Tc-SC Counts (CF IS)

| Frame | Patient |       |       |      |       |       |        |        |        |        |        |        |
|-------|---------|-------|-------|------|-------|-------|--------|--------|--------|--------|--------|--------|
|       | 1.0     | 2.0   | 3.0   | 4    | 5.0   | 6.0   | 7.0    | 8.0    | 9.0    | 10.0   | 11.0   | 12.0   |
| 1     | 156.2   | 354.9 | 325.4 | 2065 | 657.1 | 833.5 | 1316.2 | 1136.6 | 1716.9 | 1211.3 | 2839.8 | 1517.1 |
| 2     | 141.9   | 276.9 | 293.5 | 1932 | 685.1 | 749.0 | 1425.5 | 1143.7 | 1758.6 | 1043.8 | 2864.4 | 1239.7 |
| 3     | 182.1   | 347.1 | 318.8 | 1978 | 640.4 | 798.0 | 1321.4 | 1149.3 | 1777.9 | 1208.8 | 2723.4 | 1307.7 |
| 4     | 185.4   | 387.7 | 302.7 | 2025 | 701.2 | 794.5 | 1325.1 | 1035.7 | 1570.0 | 1182.1 | 2588.2 | 1215.6 |
| 5     | 166.1   | 321.5 | 307.5 | 1910 | 638.3 | 797.0 | 1215.0 | 1076.9 | 1762.6 | 1169.9 | 2695.6 | 1281.8 |
| 6     | 166.5   | 301.4 | 324.7 | 1890 | 659.5 | 828.9 | 1131.7 | 1101.6 | 1704.3 | 1061.0 | 2436.3 | 1285.8 |
| 7     | 162.3   | 288.5 | 354.0 | 1838 | 650.9 | 689.7 | 1100.4 | 988.3  | 1473.9 | 1140.5 | 2394.8 | 1191.7 |
| 8     | 160.9   | 337.7 | 320.7 | 1899 | 658.7 | 652.1 | 1179.4 | 933.7  | 1524.5 | 1095.8 | 2315.0 | 1131.9 |
| 9     | 176.6   | 277.2 | 322.3 | 1758 | 634.3 | 664.5 | 1086.1 | 1028.1 | 1561.7 | 1100.2 | 2164.1 | 1139.9 |
| 10    | 153.3   | 292.1 | 321.3 | 1780 | 618.9 | 654.7 | 1051.7 | 1057.1 | 1461.9 | 1120.9 | 2016.2 | 1046.8 |
| 11    | 147.2   | 262.3 | 278.4 | 1648 | 632.6 | 552.4 | 938.5  | 1062.9 | 1386.2 | 1061.4 | 2101.8 | 1058.0 |
| 12    | 147.5   | 232.4 | 315.0 | 1844 | 663.1 | 542.4 | 952.4  | 973.1  | 1459.1 | 1137.0 | 1942.7 | 1068.6 |
| 13    | 156.4   | 235.2 | 268.3 | 1722 | 627.6 | 687.4 | 1015.9 | 980.9  | 1342.8 | 1041.3 | 1820.7 | 979.4  |
| 14    | 173.4   | 225.1 | 280.5 | 1778 | 639.5 | 637.9 | 1037.5 | 883.6  | 1419.6 | 1138.0 | 1801.1 | 1111.4 |
| 15    | 136.5   | 228.3 | 304.7 | 1752 | 590.9 | 635.8 | 977.7  | 955.1  | 1583.4 | 1102.9 | 1795.6 | 952.7  |
| 16    | 142.7   | 222.1 | 298.5 | 1760 | 628.1 | 630.8 | 975.5  | 1018.4 | 1558.3 | 1122.6 | 1683.1 | 962.2  |
| 17    | 136.3   | 192.9 | 330.8 | 1681 | 645.3 | 691.3 | 989.2  | 970.3  | 1528.4 | 1052.7 | 1681.9 | 951.9  |
| 18    | 171.9   | 238.4 | 278.5 | 1600 | 677.0 | 641.8 | 963.7  | 1023.1 | 1512.3 | 1052.2 | 1608.1 | 1007.5 |
| 19    | 170.5   | 194.4 | 277.5 | 1742 | 686.3 | 639.6 | 1061.0 | 1065.4 | 1520.0 | 1139.7 | 1454.4 | 928.0  |
| 20    | 165.0   | 217.1 | 278.0 | 1672 | 649.2 | 641.7 | 1010.5 | 1039.5 | 1562.8 | 1083.6 | 1626.6 | 952.3  |
| 21    | 203.9   | 244.9 | 285.3 | 1709 | 606.2 | 621.0 | 1018.9 | 1006.8 | 1518.1 | 1047.3 | 1718.8 | 938.6  |
| 22    | 136.3   | 251.0 | 274.9 | 1585 | 672.4 | 551.8 | 1005.1 | 1033.9 | 1580.4 | 1135.3 | 1815.8 | 965.2  |
| 23    | 149.6   | 266.6 | 277.5 | 1768 | 655.5 | 576.1 | 988.7  | 971.7  | 1605.1 | 1142.2 | 1865.0 | 964.9  |
| 24    | 141.0   | 199.4 | 315.9 | 1728 | 639.7 | 591.2 | 1058.5 | 960.7  | 1596.3 | 985.2  | 1500.9 | 818.6  |
| 25    | 187.1   | 235.1 | 272.3 | 1739 | 655.6 | 616.8 | 909.6  | 990.2  | 1553.1 | 1033.4 | 1521.6 | 917.9  |
| 26    | 143.9   | 211.9 | 278.5 | 1647 | 659.2 | 635.0 | 1025.2 | 915.6  | 1510.6 | 974.6  | 1640.8 | 924.7  |
| 27    | 187.1   | 224.2 | 277.6 | 1804 | 690.5 | 602.4 | 906.9  | 930.2  | 1666.1 | 1045.4 | 1650.1 | 892.8  |
| 28    | 178.5   | 225.6 | 284.6 | 1711 | 725.0 | 556.0 | 920.4  | 860.2  | 1581.6 | 1065.6 | 1677.0 | 964.3  |
| 29    | 183.6   | 214.2 | 291.2 | 1763 | 725.3 | 578.0 | 996.5  | 822.4  | 1533.0 | 1031.4 | 1534.8 | 928.9  |
| 30    | 142.5   | 173.4 | 259.8 | 1736 | 645.2 | 559.7 | 878.8  | 883.4  | 1521.4 | 976.4  | 1619.3 | 962.1  |
| 31    | 187.2   | 236.2 | 293.1 | 1723 | 637.0 | 596.6 | 936.0  | 1035.5 | 1475.7 | 1050.6 | 1491.9 | 904.6  |
| 32    | 175.5   | 222.9 | 246.2 | 1800 | 557.9 | 546.6 | 917.9  | 896.4  | 1495.4 | 1071.7 | 1577.8 | 939.5  |
| 33    | 171.3   | 202.5 | 306.5 | 1688 | 600.1 | 591.2 | 812.8  | 867.2  | 1568.8 | 950.3  | 1573.8 | 943.2  |
| 34    | 171.2   | 188.3 | 299.3 | 1633 | 580.6 | 619.2 | 945.1  | 929.6  | 1530.5 | 983.3  | 1580.9 | 843.8  |
| 35    | 169.0   | 204.1 | 281.8 | 1652 | 590.0 | 534.7 | 892.9  | 983.8  | 1443.4 | 1057.7 | 1614.9 | 848.9  |
| 36    | 147.2   | 212.8 | 254.2 | 1680 | 534.6 | 621.5 | 958.6  | 1041.4 | 1606.1 | 967.3  | 1489.9 | 819.6  |
| 37    | 140.1   | 172.0 | 245.6 | 1689 | 588.9 | 595.4 | 930.7  | 914.8  | 1466.5 | 949.0  | 1535.4 | 938.5  |
| 38    | 161.9   | 206.3 | 295.5 | 1623 | 628.1 | 575.8 | 931.2  | 1002.2 | 1572.2 | 923.9  | 1642.0 | 847.7  |
| 39    | 180.5   | 216.5 | 261.9 | 1691 | 569.8 | 567.1 | 955.1  | 948.7  | 1462.5 | 896.7  | 1668.7 | 859.8  |
| 40    | 181.5   | 210.4 | 274.8 | 1631 | 596.6 | 573.0 | 966.0  | 1035.6 | 1512.3 | 905.6  | 1631.9 | 939.7  |

|    |       |       |       |      |       |       |       |       |        |       |        |       |
|----|-------|-------|-------|------|-------|-------|-------|-------|--------|-------|--------|-------|
| 41 | 162.1 | 192.4 | 245.8 | 1652 | 553.1 | 563.1 | 847.6 | 966.3 | 1396.6 | 938.9 | 1533.0 | 944.8 |
| 42 | 172.6 | 186.2 | 240.3 | 1693 | 498.5 | 645.2 | 857.0 | 983.1 | 1447.3 | 923.4 | 1559.0 | 990.5 |
| 43 | 178.1 | 203.2 | 243.8 | 1650 | 548.4 | 598.2 | 955.2 | 997.1 | 1481.2 | 929.9 | 1710.4 | 885.3 |
| 44 | 176.4 | 188.1 | 238.3 | 1681 | 560.7 | 596.5 | 895.2 | 954.4 | 1530.4 | 886.4 | 1638.2 | 945.6 |
| 45 | 171.3 | 200.9 | 264.8 | 1648 | 662.6 | 629.6 | 942.8 | 941.9 | 1455.9 | 914.6 | 1656.9 | 847.5 |
| 46 | 144.9 | 196.4 | 243.0 | 1756 | 704.5 | 576.3 | 934.6 | 978.0 | 1424.2 | 895.3 | 1704.1 | 911.5 |
| 47 | 182.6 | 215.7 | 274.9 | 1627 | 697.9 | 552.9 | 865.0 | 885.2 | 1457.6 | 969.9 | 1642.2 | 900.1 |
| 48 | 156.8 | 183.8 | 262.8 | 1744 | 683.6 | 577.9 | 877.4 | 893.5 | 1386.7 | 799.9 | 1688.5 | 880.3 |
| 49 | 173.2 | 197.5 | 275.7 | 1607 | 639.6 | 585.1 | 898.8 | 831.3 | 1461.7 | 896.3 | 1694.3 | 880.3 |
| 50 | 181.8 | 195.2 | 243.8 | 1695 | 708.7 | 567.5 | 955.2 | 857.7 | 1519.2 | 863.2 | 1695.6 | 897.1 |
| 51 | 165.6 | 211.8 | 234.5 | 1631 | 609.9 | 533.3 | 937.6 | 836.3 | 1440.3 | 925.3 | 1587.6 | 916.1 |
| 52 | 160.8 | 173.3 | 278.3 | 1591 | 720.1 | 574.1 | 867.0 | 848.4 | 1444.5 | 896.2 | 1604.6 | 916.7 |
| 53 | 177.6 | 225.3 | 249.0 | 1608 | 711.4 | 598.1 | 880.0 | 797.4 | 1467.2 | 836.8 | 1644.8 | 931.5 |
| 54 | 195.7 | 227.9 | 176.4 | 1539 | 674.6 | 635.1 | 896.6 | 909.6 | 1271.0 | 882.6 | 1480.0 | 849.1 |
| 55 | 163.4 | 188.4 | 214.8 | 1562 | 702.4 | 597.9 | 837.2 | 924.7 | 1344.2 | 847.5 | 1322.5 | 894.5 |
| 56 | 161.4 | 167.7 | 183.5 | 1531 | 694.0 | 565.1 | 884.5 | 894.0 | 1337.2 | 888.8 | 1485.1 | 951.2 |
| 57 | 191.9 | 239.6 | 276.3 | 1464 | 633.2 | 543.9 | 791.9 | 982.6 | 1395.4 | 911.5 | 1401.8 | 945.9 |
| 58 | 186.5 | 220.5 | 275.7 | 1553 | 650.1 | 618.4 | 910.4 | 857.3 | 1442.0 | 808.2 | 1340.9 | 898.3 |
| 59 | 160.6 | 204.5 | 206.0 | 1479 | 679.3 | 540.9 | 930.4 | 884.6 | 1628.4 | 848.1 | 1373.4 | 843.4 |
| 60 | 110.8 | 232.6 | 240.4 | 1552 | 582.0 | 476.8 | 912.6 | 845.6 | 1690.9 | 889.8 | 1429.8 | 836.5 |
| 61 | 111.3 | 201.3 | 254.5 | 1580 | 637.5 | 539.2 | 879.2 | 957.8 | 1477.8 | 859.2 | 1335.1 | 930.7 |
| 62 | 172.7 | 202.5 | 237.6 | 1432 | 580.5 | 548.9 | 891.9 | 884.0 | 1641.8 | 777.7 | 1482.9 | 874.2 |
| 63 | 183.7 | 180.4 | 248.7 | 1502 | 647.0 | 490.7 | 833.2 | 865.4 | 1512.2 | 849.7 | 1395.6 | 910.3 |
| 64 | 152.1 | 233.2 | 232.5 | 1417 | 643.1 | 530.3 | 860.3 | 888.4 | 1613.6 | 866.1 | 1387.1 | 903.1 |
| 65 | 141.6 | 191.5 | 252.2 | 1467 | 647.8 | 582.0 | 776.8 | 755.7 | 1638.0 | 807.0 | 1411.1 | 840.6 |
| 66 | 141.0 | 227.0 | 219.6 | 1370 | 643.9 | 466.9 | 882.0 | 898.4 | 1582.5 | 875.3 | 1382.4 | 849.6 |
| 67 | 132.6 | 197.2 | 224.0 | 1363 | 673.2 | 544.4 | 927.4 | 861.6 | 1559.0 | 668.4 | 1422.8 | 813.9 |
| 68 | 173.6 | 196.1 | 220.9 | 1414 | 574.6 | 490.9 | 857.7 | 835.8 | 1519.0 | 786.8 | 1390.5 | 852.8 |
| 69 | 186.4 | 212.7 | 227.6 | 1347 | 679.8 | 605.4 | 865.5 | 922.2 | 1543.9 | 854.4 | 1399.1 | 896.4 |
| 70 | 143.2 | 211.4 | 236.4 | 1397 | 573.2 | 443.9 | 887.0 | 875.6 | 1585.6 | 789.8 | 1396.3 | 848.3 |
| 71 | 179.9 | 222.6 | 258.0 | 1257 | 564.0 | 412.5 | 912.1 | 844.1 | 1503.1 | 835.7 | 1467.6 | 878.2 |
| 72 | 158.8 | 206.1 | 256.4 | 1368 | 595.7 | 455.5 | 889.2 | 888.8 | 1527.6 | 806.1 | 1420.4 | 844.1 |
| 73 | 117.1 | 240.1 | 204.7 | 1340 | 577.1 | 433.9 | 934.1 | 863.5 | 1452.5 | 786.6 | 1571.5 | 876.4 |
| 74 | 153.9 | 191.7 | 258.5 | 1278 | 553.0 | 410.9 | 847.4 | 937.5 | 1316.9 | 710.4 | 1425.0 | 945.8 |
| 75 | 174.8 | 214.5 | 219.9 | 1299 | 576.0 | 403.0 | 888.3 | 869.0 | 1382.4 | 742.0 | 1461.9 | 894.3 |
| 76 | 162.9 | 178.9 | 180.2 | 1226 | 595.0 | 381.8 | 921.7 | 866.5 | 1315.7 | 833.0 | 1380.7 | 868.4 |
| 77 | 135.6 | 177.6 | 236.0 | 1219 | 567.8 | 414.9 | 846.2 | 997.5 | 1373.8 | 700.0 | 1531.6 | 819.7 |
| 78 | 137.9 | 199.5 | 232.1 | 1293 | 564.6 | 414.7 | 895.7 | 930.4 | 1444.4 | 765.0 | 1460.5 | 804.6 |
| 79 | 97.2  | 141.8 | 237.2 | 1222 | 588.6 | 353.0 | 830.9 | 826.7 | 1452.5 | 767.8 | 1344.2 | 855.1 |
| 80 | 96.1  | 160.7 | 229.2 | 1252 | 604.6 | 410.8 | 873.5 | 941.8 | 1368.6 | 698.1 | 1488.2 | 913.8 |

Whole Lung In-DTPA Counts (CF IS)

| Frame | Patient |       |       |       |       |       |       |       |       |       |        |       |
|-------|---------|-------|-------|-------|-------|-------|-------|-------|-------|-------|--------|-------|
|       | 1       | 2     | 3     | 4     | 5     | 6     | 7     | 8     | 9     | 10    | 11     | 12    |
| 1     | 81.8    | 130.8 | 154.0 | 860.1 | 259.2 | 299.7 | 406.7 | 367.1 | 814.3 | 393.9 | 1567.9 | 539.5 |
| 2     | 77.4    | 135.8 | 133.0 | 870.3 | 291.3 | 320.7 | 399.7 | 345.1 | 848.5 | 355.9 | 1545.1 | 512.6 |
| 3     | 82.2    | 98.9  | 112.1 | 872.4 | 261.3 | 289.7 | 371.8 | 408.2 | 789.2 | 367.0 | 1467.4 | 511.7 |
| 4     | 85.3    | 90.9  | 134.1 | 755.5 | 248.4 | 273.8 | 415.9 | 363.2 | 753.9 | 345.0 | 1450.6 | 474.7 |
| 5     | 74.3    | 113.9 | 119.1 | 776.7 | 274.4 | 258.8 | 390.9 | 329.3 | 771.5 | 344.1 | 1423.8 | 539.9 |
| 6     | 71.1    | 101.9 | 127.1 | 863.9 | 252.5 | 271.9 | 362.0 | 321.5 | 739.4 | 395.2 | 1368.0 | 439.9 |
| 7     | 69.7    | 112.9 | 129.2 | 817.0 | 276.5 | 226.9 | 310.0 | 310.0 | 688.4 | 366.2 | 1349.2 | 450.9 |
| 8     | 60.1    | 102.9 | 141.2 | 797.1 | 250.5 | 265.0 | 337.1 | 286.0 | 723.6 | 358.3 | 1370.5 | 445.0 |
| 9     | 53.1    | 100.0 | 129.2 | 731.1 | 290.6 | 223.9 | 295.1 | 291.9 | 710.7 | 377.4 | 1335.7 | 430.1 |
| 10    | 84.9    | 112.0 | 133.2 | 760.3 | 276.7 | 189.9 | 241.0 | 266.9 | 676.8 | 329.4 | 1276.8 | 470.2 |
| 11    | 81.0    | 94.0  | 126.2 | 711.3 | 241.7 | 230.0 | 274.1 | 275.9 | 614.8 | 341.4 | 1141.8 | 421.2 |
| 12    | 73.6    | 97.0  | 110.2 | 771.6 | 244.7 | 237.1 | 221.1 | 262.9 | 651.9 | 376.6 | 1137.9 | 451.3 |
| 13    | 65.5    | 87.0  | 139.3 | 752.7 | 237.7 | 187.0 | 249.2 | 262.0 | 650.1 | 324.5 | 1178.2 | 412.3 |
| 14    | 68.6    | 91.0  | 121.3 | 738.8 | 224.7 | 225.1 | 248.2 | 241.2 | 621.1 | 313.6 | 1045.1 | 428.4 |
| 15    | 55.7    | 95.0  | 120.3 | 718.9 | 280.9 | 219.2 | 236.2 | 268.3 | 614.2 | 296.6 | 1081.4 | 383.4 |
| 16    | 53.7    | 96.1  | 102.3 | 761.1 | 232.8 | 184.1 | 239.3 | 280.4 | 603.3 | 330.7 | 1065.5 | 361.0 |
| 17    | 55.8    | 75.0  | 122.4 | 742.2 | 221.8 | 210.2 | 240.3 | 275.2 | 613.4 | 347.8 | 1020.6 | 379.1 |
| 18    | 45.5    | 102.1 | 106.3 | 723.2 | 256.4 | 186.2 | 203.2 | 254.0 | 596.4 | 321.8 | 1019.8 | 357.1 |
| 19    | 84.1    | 84.1  | 133.4 | 739.0 | 233.4 | 193.2 | 220.3 | 246.4 | 613.6 | 349.9 | 1037.0 | 347.1 |
| 20    | 48.2    | 75.1  | 102.4 | 781.7 | 214.5 | 202.3 | 202.3 | 256.5 | 565.5 | 290.8 | 897.7  | 368.3 |
| 21    | 47.2    | 65.0  | 93.3  | 740.7 | 254.7 | 202.3 | 194.3 | 252.5 | 598.8 | 293.9 | 993.2  | 323.2 |
| 22    | 71.3    | 77.1  | 130.5 | 745.8 | 222.6 | 170.2 | 184.3 | 233.5 | 577.8 | 332.1 | 927.1  | 356.3 |
| 23    | 65.3    | 74.1  | 103.4 | 710.8 | 215.0 | 186.3 | 170.3 | 220.1 | 593.9 | 325.3 | 934.3  | 347.4 |
| 24    | 71.3    | 65.1  | 112.5 | 645.7 | 238.2 | 169.3 | 188.4 | 258.7 | 511.7 | 349.4 | 931.4  | 354.5 |
| 25    | 62.3    | 83.2  | 123.5 | 666.9 | 230.2 | 150.2 | 182.4 | 229.6 | 586.1 | 300.3 | 940.6  | 343.1 |
| 26    | 60.1    | 73.1  | 104.5 | 711.2 | 212.1 | 165.3 | 197.5 | 221.6 | 551.1 | 325.5 | 895.6  | 349.2 |
| 27    | 54.1    | 82.2  | 94.4  | 695.2 | 209.2 | 181.4 | 171.4 | 216.6 | 531.1 | 335.6 | 823.4  | 310.0 |
| 28    | 61.1    | 67.1  | 105.5 | 673.2 | 226.3 | 142.3 | 180.5 | 230.7 | 612.5 | 323.6 | 859.7  | 324.2 |
| 29    | 74.2    | 49.0  | 127.6 | 710.5 | 218.3 | 177.5 | 198.6 | 184.5 | 559.4 | 264.3 | 846.8  | 296.1 |
| 30    | 67.1    | 71.2  | 111.6 | 650.3 | 223.3 | 142.3 | 156.4 | 216.7 | 543.4 | 337.7 | 844.9  | 280.0 |
| 31    | 76.2    | 94.3  | 98.5  | 622.3 | 181.2 | 150.4 | 161.5 | 196.6 | 579.7 | 286.5 | 879.3  | 285.1 |
| 32    | 69.0    | 60.1  | 109.6 | 658.0 | 215.4 | 188.6 | 143.4 | 214.8 | 598.9 | 296.6 | 871.4  | 291.2 |
| 33    | 64.4    | 64.2  | 112.6 | 633.4 | 210.4 | 175.6 | 130.3 | 196.7 | 515.5 | 319.8 | 840.4  | 338.5 |
| 34    | 68.4    | 68.2  | 110.6 | 672.7 | 195.1 | 145.4 | 155.5 | 203.8 | 511.6 | 312.8 | 861.6  | 271.2 |
| 35    | 60.4    | 67.2  | 108.7 | 637.6 | 222.3 | 143.5 | 133.4 | 197.8 | 560.0 | 314.9 | 829.6  | 333.6 |
| 36    | 58.4    | 54.1  | 88.5  | 650.8 | 201.2 | 149.5 | 138.5 | 224.0 | 515.8 | 299.8 | 819.7  | 300.5 |
| 37    | 72.5    | 80.3  | 106.7 | 661.0 | 268.3 | 114.3 | 138.5 | 205.5 | 491.7 | 297.7 | 825.8  | 287.4 |
| 38    | 78.5    | 78.3  | 112.7 | 625.9 | 201.9 | 139.5 | 132.5 | 196.5 | 458.6 | 287.7 | 810.9  | 266.3 |
| 39    | 47.7    | 68.3  | 87.6  | 619.9 | 206.0 | 160.7 | 151.6 | 217.7 | 477.8 | 303.8 | 847.3  | 255.3 |
| 40    | 63.8    | 68.3  | 88.6  | 613.0 | 210.0 | 140.6 | 109.3 | 204.6 | 478.9 | 292.8 | 765.8  | 267.4 |

|    |      |      |       |       |       |       |       |       |       |       |       |       |
|----|------|------|-------|-------|-------|-------|-------|-------|-------|-------|-------|-------|
| 41 | 62.0 | 60.2 | 133.9 | 646.3 | 207.1 | 123.5 | 112.4 | 189.5 | 470.9 | 254.6 | 772.0 | 263.5 |
| 42 | 34.9 | 72.3 | 108.8 | 663.6 | 224.2 | 110.4 | 118.5 | 211.7 | 431.7 | 286.9 | 787.3 | 246.4 |
| 43 | 66.3 | 59.2 | 77.6  | 621.4 | 150.7 | 162.8 | 127.5 | 222.8 | 445.9 | 264.7 | 783.4 | 248.4 |
| 44 | 62.1 | 55.2 | 97.7  | 589.2 | 175.9 | 135.6 | 112.4 | 213.8 | 522.5 | 271.8 | 732.1 | 249.5 |
| 45 | 37.9 | 58.2 | 95.7  | 635.7 | 179.0 | 138.7 | 127.6 | 184.6 | 492.4 | 266.9 | 761.5 | 261.6 |
| 46 | 49.0 | 58.3 | 101.8 | 636.8 | 242.5 | 122.6 | 119.5 | 205.8 | 498.5 | 282.0 | 771.7 | 254.6 |
| 47 | 68.4 | 71.4 | 83.7  | 586.5 | 182.1 | 136.7 | 97.4  | 171.4 | 452.2 | 291.1 | 720.4 | 210.3 |
| 48 | 54.6 | 46.2 | 82.7  | 581.6 | 195.2 | 150.8 | 158.9 | 204.7 | 454.3 | 267.0 | 734.6 | 270.8 |
| 49 | 31.7 | 78.5 | 81.7  | 644.2 | 221.5 | 119.6 | 113.6 | 190.6 | 501.8 | 267.0 | 769.1 | 192.8 |
| 50 | 44.8 | 68.4 | 100.9 | 616.1 | 195.9 | 133.7 | 97.4  | 167.4 | 503.9 | 268.1 | 727.8 | 261.4 |
| 51 | 54.9 | 63.4 | 97.9  | 593.0 | 175.3 | 130.7 | 112.6 | 205.8 | 485.8 | 263.1 | 731.0 | 242.3 |
| 52 | 42.8 | 80.5 | 114.0 | 577.9 | 206.2 | 109.6 | 107.6 | 195.9 | 464.7 | 271.2 | 805.8 | 234.9 |
| 53 | 40.8 | 64.4 | 79.7  | 535.7 | 154.2 | 110.6 | 115.6 | 214.1 | 421.4 | 255.1 | 775.6 | 228.9 |
| 54 | 45.8 | 50.3 | 80.7  | 524.6 | 210.1 | 124.8 | 105.6 | 169.8 | 457.8 | 265.3 | 746.5 | 223.9 |
| 55 | 59.0 | 46.2 | 91.9  | 587.3 | 180.9 | 126.8 | 112.7 | 218.3 | 438.7 | 282.5 | 675.0 | 227.9 |
| 56 | 30.7 | 59.4 | 86.8  | 563.2 | 183.0 | 130.9 | 103.6 | 181.9 | 475.2 | 279.5 | 711.0 | 221.9 |
| 57 | 53.9 | 80.6 | 83.8  | 545.1 | 178.9 | 129.9 | 94.5  | 165.8 | 412.6 | 236.1 | 742.4 | 244.2 |
| 58 | 49.9 | 45.2 | 89.9  | 535.1 | 189.7 | 120.8 | 102.6 | 162.8 | 414.7 | 255.3 | 659.7 | 225.0 |
| 59 | 51.9 | 61.4 | 95.0  | 556.4 | 204.9 | 140.0 | 114.8 | 176.0 | 438.0 | 275.6 | 684.1 | 237.2 |
| 60 | 53.1 | 64.5 | 87.9  | 546.4 | 167.5 | 125.9 | 106.7 | 149.7 | 411.8 | 271.6 | 711.5 | 232.2 |
| 61 | 54.2 | 51.3 | 75.8  | 585.9 | 190.8 | 95.6  | 111.8 | 193.2 | 409.3 | 279.7 | 642.9 | 229.2 |
| 62 | 49.1 | 53.4 | 85.9  | 526.4 | 193.9 | 102.7 | 91.6  | 159.9 | 459.9 | 246.4 | 642.0 | 211.0 |
| 63 | 61.1 | 38.2 | 80.9  | 585.1 | 195.9 | 101.7 | 121.9 | 156.9 | 465.0 | 234.3 | 721.0 | 237.4 |
| 64 | 39.2 | 33.2 | 91.0  | 523.5 | 190.9 | 98.7  | 112.8 | 148.8 | 392.7 | 247.5 | 638.2 | 206.1 |
| 65 | 60.5 | 47.3 | 75.8  | 488.2 | 174.3 | 80.5  | 88.6  | 171.1 | 403.5 | 239.5 | 651.4 | 227.3 |
| 66 | 50.4 | 51.4 | 90.0  | 516.0 | 199.9 | 111.9 | 64.3  | 150.9 | 430.9 | 280.0 | 641.4 | 215.2 |
| 67 | 39.5 | 49.4 | 65.8  | 524.2 | 189.8 | 102.8 | 123.0 | 201.5 | 441.7 | 264.8 | 636.5 | 211.2 |
| 68 | 68.8 | 39.3 | 74.9  | 478.8 | 185.8 | 85.6  | 104.8 | 137.8 | 405.3 | 226.4 | 635.6 | 188.0 |
| 69 | 51.6 | 35.2 | 74.9  | 483.9 | 180.7 | 91.7  | 97.8  | 168.2 | 428.7 | 221.8 | 637.7 | 205.2 |
| 70 | 44.5 | 62.5 | 53.6  | 531.6 | 171.7 | 104.9 | 85.6  | 157.1 | 426.7 | 238.0 | 620.6 | 181.0 |
| 71 | 55.7 | 56.5 | 70.9  | 507.4 | 179.8 | 105.9 | 113.0 | 171.3 | 398.4 | 239.1 | 630.9 | 205.3 |
| 72 | 56.7 | 51.4 | 107.3 | 483.1 | 171.7 | 77.6  | 100.8 | 147.0 | 421.8 | 210.8 | 676.5 | 195.2 |
| 73 | 61.8 | 47.4 | 63.8  | 494.4 | 175.8 | 87.7  | 104.9 | 184.5 | 399.6 | 242.2 | 613.9 | 203.3 |
| 74 | 58.7 | 55.5 | 87.1  | 480.3 | 194.1 | 107.0 | 112.0 | 154.1 | 368.3 | 235.2 | 596.7 | 227.7 |
| 75 | 58.8 | 40.3 | 65.8  | 435.8 | 173.8 | 89.7  | 84.7  | 165.3 | 363.7 | 258.5 | 610.0 | 197.3 |
| 76 | 36.3 | 58.6 | 81.1  | 438.9 | 183.0 | 115.1 | 117.1 | 168.4 | 353.6 | 210.9 | 604.0 | 215.6 |
| 77 | 57.4 | 51.5 | 70.9  | 459.2 | 165.8 | 94.8  | 97.9  | 163.8 | 364.2 | 200.8 | 618.3 | 206.5 |
| 78 | 32.0 | 52.5 | 68.9  | 440.1 | 173.9 | 92.8  | 102.0 | 150.6 | 323.3 | 207.0 | 603.2 | 178.2 |
| 79 | 45.2 | 44.4 | 51.7  | 472.6 | 168.9 | 101.0 | 68.5  | 141.5 | 361.9 | 216.1 | 549.6 | 207.6 |
| 80 | 48.5 | 54.5 | 75.0  | 477.7 | 187.2 | 82.7  | 104.0 | 160.8 | 340.7 | 222.2 | 577.1 | 214.7 |

Central Lung In-DTPA Counts (CF IS)

| Frame | Patient |      |      |       |       |       |       |       |       |       |       |       |
|-------|---------|------|------|-------|-------|-------|-------|-------|-------|-------|-------|-------|
|       | 1.0     | 2.0  | 3.0  | 4.0   | 5.0   | 6.0   | 7.0   | 8.0   | 9.0   | 10.0  | 11.0  | 12.0  |
| 1     | 34.2    | 59.2 | 67.0 | 522.7 | 120.6 | 104.2 | 222.2 | 177.2 | 338.1 | 211.6 | 793.7 | 316.9 |
| 2     | 31.2    | 68.2 | 46.0 | 535.8 | 131.6 | 118.2 | 222.3 | 175.3 | 343.1 | 198.7 | 718.0 | 310.9 |
| 3     | 33.4    | 39.2 | 33.0 | 514.9 | 109.7 | 108.3 | 207.3 | 173.7 | 306.4 | 199.7 | 714.2 | 295.0 |
| 4     | 31.4    | 44.2 | 51.0 | 468.9 | 97.7  | 120.3 | 212.3 | 154.7 | 303.4 | 180.7 | 684.3 | 291.0 |
| 5     | 23.4    | 46.2 | 45.0 | 445.0 | 96.7  | 101.3 | 221.4 | 136.7 | 304.5 | 200.8 | 701.4 | 305.1 |
| 6     | 33.0    | 47.2 | 50.1 | 556.2 | 93.7  | 94.3  | 192.4 | 119.7 | 297.1 | 203.8 | 646.5 | 260.1 |
| 7     | 24.6    | 50.3 | 62.1 | 524.2 | 113.7 | 87.3  | 171.4 | 131.4 | 275.1 | 188.8 | 617.5 | 249.1 |
| 8     | 25.0    | 45.3 | 61.1 | 469.2 | 98.7  | 89.3  | 183.5 | 108.3 | 235.1 | 198.9 | 613.6 | 277.2 |
| 9     | 28.2    | 44.3 | 49.1 | 447.3 | 120.8 | 69.3  | 148.4 | 131.0 | 285.2 | 211.9 | 608.7 | 252.2 |
| 10    | 31.7    | 48.3 | 50.1 | 489.4 | 119.8 | 63.3  | 112.4 | 132.2 | 255.2 | 192.9 | 536.7 | 253.2 |
| 11    | 29.7    | 41.3 | 47.1 | 410.4 | 91.8  | 62.3  | 132.5 | 118.2 | 223.2 | 184.9 | 508.0 | 232.2 |
| 12    | 36.9    | 49.3 | 43.1 | 447.5 | 110.8 | 68.3  | 105.4 | 115.2 | 239.3 | 207.0 | 518.7 | 244.3 |
| 13    | 31.9    | 15.2 | 55.1 | 460.6 | 94.8  | 63.3  | 109.4 | 120.3 | 234.3 | 183.0 | 460.6 | 205.3 |
| 14    | 34.9    | 37.3 | 44.1 | 457.7 | 89.8  | 61.3  | 114.5 | 100.4 | 200.3 | 175.0 | 440.7 | 209.3 |
| 15    | 20.7    | 38.3 | 54.1 | 446.8 | 124.9 | 77.4  | 114.5 | 95.4  | 260.1 | 144.0 | 444.7 | 200.3 |
| 16    | 20.7    | 31.3 | 41.1 | 460.9 | 98.9  | 50.3  | 129.6 | 141.6 | 250.1 | 187.1 | 440.8 | 185.1 |
| 17    | 18.7    | 31.3 | 50.1 | 460.9 | 103.9 | 65.4  | 119.5 | 131.0 | 255.1 | 188.1 | 409.8 | 223.3 |
| 18    | 27.3    | 41.3 | 51.2 | 437.0 | 125.6 | 61.4  | 100.5 | 129.0 | 248.2 | 179.2 | 412.9 | 198.2 |
| 19    | 50.0    | 36.3 | 54.2 | 440.2 | 106.5 | 66.4  | 105.5 | 119.6 | 248.2 | 170.2 | 378.0 | 197.2 |
| 20    | 25.3    | 23.3 | 42.1 | 448.1 | 100.5 | 62.4  | 103.6 | 115.6 | 225.2 | 148.1 | 336.0 | 197.3 |
| 21    | 27.3    | 33.3 | 36.1 | 444.2 | 104.6 | 64.4  | 87.5  | 99.6  | 253.3 | 157.2 | 396.2 | 174.2 |
| 22    | 36.3    | 27.3 | 50.2 | 498.5 | 95.6  | 44.4  | 80.5  | 110.6 | 259.4 | 180.3 | 421.4 | 183.3 |
| 23    | 26.3    | 35.3 | 40.2 | 403.2 | 101.2 | 60.4  | 82.5  | 105.8 | 243.4 | 193.2 | 390.3 | 196.4 |
| 24    | 29.3    | 41.4 | 41.2 | 404.3 | 116.3 | 52.4  | 80.5  | 102.2 | 203.2 | 189.2 | 398.4 | 168.3 |
| 25    | 26.9    | 34.3 | 44.2 | 436.5 | 103.2 | 54.4  | 82.6  | 107.3 | 241.4 | 154.1 | 377.4 | 180.6 |
| 26    | 25.5    | 29.3 | 33.1 | 469.7 | 94.2  | 52.4  | 88.6  | 102.3 | 222.4 | 177.2 | 331.3 | 177.6 |
| 27    | 34.4    | 33.4 | 41.2 | 454.7 | 105.3 | 49.4  | 73.5  | 101.3 | 209.4 | 194.3 | 358.5 | 177.6 |
| 28    | 24.3    | 27.3 | 40.2 | 426.6 | 101.3 | 47.4  | 95.7  | 107.3 | 277.7 | 191.3 | 357.5 | 170.6 |
| 29    | 25.3    | 22.3 | 55.3 | 455.9 | 118.4 | 55.5  | 85.6  | 86.2  | 226.5 | 148.1 | 356.6 | 158.6 |
| 30    | 35.4    | 20.3 | 37.2 | 442.9 | 90.3  | 48.4  | 86.6  | 95.3  | 207.5 | 166.3 | 324.5 | 160.6 |
| 31    | 32.4    | 30.4 | 39.2 | 421.8 | 83.2  | 42.4  | 71.6  | 92.3  | 222.6 | 135.1 | 314.5 | 167.7 |
| 32    | 28.2    | 27.4 | 43.2 | 431.2 | 109.4 | 52.5  | 57.5  | 93.3  | 235.7 | 142.2 | 365.8 | 155.7 |
| 33    | 37.4    | 26.3 | 52.3 | 387.2 | 97.4  | 59.5  | 57.5  | 93.3  | 219.6 | 179.4 | 331.7 | 169.8 |
| 34    | 35.4    | 37.4 | 31.2 | 402.3 | 103.4 | 44.5  | 70.6  | 86.3  | 198.6 | 149.3 | 349.8 | 133.6 |
| 35    | 22.3    | 25.4 | 45.3 | 433.6 | 95.4  | 41.4  | 57.5  | 74.2  | 230.8 | 161.4 | 321.7 | 146.7 |
| 36    | 28.4    | 26.4 | 37.2 | 432.7 | 92.4  | 45.5  | 49.5  | 94.4  | 213.7 | 151.3 | 333.9 | 136.6 |
| 37    | 24.4    | 38.4 | 35.2 | 453.9 | 104.7 | 42.5  | 67.6  | 81.5  | 207.7 | 175.7 | 313.8 | 153.8 |
| 38    | 37.4    | 26.4 | 43.3 | 419.7 | 81.5  | 39.5  | 73.7  | 101.7 | 184.6 | 168.7 | 304.8 | 133.7 |
| 39    | 32.8    | 24.4 | 36.2 | 385.6 | 88.6  | 62.6  | 62.6  | 103.7 | 186.6 | 153.6 | 341.1 | 125.6 |
| 40    | 26.8    | 24.4 | 23.2 | 403.8 | 98.7  | 37.5  | 56.6  | 104.3 | 211.9 | 145.6 | 273.7 | 139.8 |

|    |      |      |      |       |       |      |      |       |       |       |       |       |
|----|------|------|------|-------|-------|------|------|-------|-------|-------|-------|-------|
| 41 | 24.8 | 34.4 | 45.3 | 421.0 | 74.5  | 33.4 | 45.5 | 89.2  | 155.5 | 143.6 | 328.1 | 148.8 |
| 42 | 21.8 | 37.5 | 37.3 | 448.2 | 88.6  | 34.4 | 62.7 | 84.2  | 155.5 | 141.6 | 329.2 | 137.8 |
| 43 | 31.8 | 23.4 | 20.1 | 417.1 | 57.4  | 51.6 | 62.7 | 112.4 | 166.6 | 151.7 | 304.0 | 124.7 |
| 44 | 31.0 | 30.4 | 33.3 | 402.0 | 64.5  | 45.5 | 37.5 | 94.3  | 197.9 | 135.6 | 290.0 | 133.8 |
| 45 | 20.2 | 25.4 | 30.2 | 429.3 | 90.7  | 36.5 | 66.7 | 94.3  | 182.8 | 129.6 | 319.3 | 139.9 |
| 46 | 32.3 | 23.4 | 27.2 | 413.3 | 117.9 | 24.4 | 52.6 | 87.3  | 191.9 | 149.8 | 344.5 | 127.8 |
| 47 | 34.7 | 25.4 | 28.2 | 371.0 | 88.7  | 42.5 | 43.6 | 76.2  | 164.7 | 138.7 | 322.4 | 95.6  |
| 48 | 22.6 | 22.4 | 23.2 | 384.2 | 98.8  | 44.6 | 66.7 | 72.2  | 190.0 | 138.7 | 303.3 | 130.9 |
| 49 | 16.5 | 37.5 | 27.2 | 440.7 | 99.8  | 24.4 | 54.7 | 78.3  | 186.0 | 137.8 | 329.6 | 107.9 |
| 50 | 21.6 | 23.4 | 36.3 | 399.4 | 93.8  | 47.6 | 39.5 | 70.2  | 186.0 | 138.8 | 303.4 | 133.1 |
| 51 | 31.7 | 19.4 | 41.4 | 402.5 | 76.9  | 35.5 | 50.6 | 75.3  | 187.0 | 138.8 | 326.7 | 138.2 |
| 52 | 23.6 | 26.4 | 35.3 | 394.5 | 103.7 | 38.5 | 56.7 | 78.1  | 167.9 | 138.8 | 327.7 | 118.1 |
| 53 | 19.6 | 33.5 | 32.3 | 372.4 | 72.3  | 28.5 | 44.6 | 89.2  | 172.0 | 141.9 | 323.7 | 125.1 |
| 54 | 18.6 | 32.5 | 21.2 | 362.3 | 87.6  | 32.5 | 42.6 | 82.2  | 174.0 | 132.8 | 315.7 | 106.0 |
| 55 | 32.7 | 22.4 | 17.2 | 394.7 | 84.6  | 37.6 | 43.6 | 96.3  | 179.1 | 149.0 | 240.1 | 112.1 |
| 56 | 18.6 | 20.4 | 39.4 | 376.6 | 95.7  | 39.6 | 49.7 | 89.3  | 171.0 | 144.0 | 283.5 | 104.0 |
| 57 | 19.4 | 34.5 | 20.2 | 350.4 | 90.7  | 55.7 | 47.7 | 73.1  | 177.1 | 150.1 | 289.6 | 125.2 |
| 58 | 21.4 | 17.4 | 29.3 | 366.6 | 83.8  | 53.7 | 51.7 | 71.1  | 172.1 | 138.0 | 238.2 | 113.1 |
| 59 | 27.5 | 25.5 | 28.3 | 357.6 | 97.0  | 42.6 | 49.7 | 84.3  | 184.3 | 141.0 | 269.5 | 136.4 |
| 60 | 23.4 | 29.5 | 26.3 | 362.7 | 74.8  | 42.6 | 46.7 | 58.0  | 169.1 | 150.1 | 239.3 | 111.1 |
| 61 | 28.9 | 23.4 | 21.2 | 373.9 | 76.8  | 44.7 | 41.6 | 95.4  | 157.2 | 162.3 | 248.4 | 114.2 |
| 62 | 28.9 | 27.5 | 29.3 | 354.8 | 84.9  | 37.6 | 49.7 | 60.0  | 210.8 | 121.9 | 236.3 | 96.0  |
| 63 | 28.9 | 25.5 | 35.4 | 357.9 | 98.1  | 22.4 | 56.8 | 67.1  | 178.5 | 117.9 | 296.0 | 101.1 |
| 64 | 17.6 | 25.5 | 19.2 | 363.0 | 91.0  | 13.3 | 57.8 | 63.1  | 179.6 | 128.0 | 259.6 | 97.1  |
| 65 | 28.7 | 24.5 | 19.2 | 330.7 | 78.9  | 23.5 | 37.6 | 69.2  | 178.4 | 110.8 | 265.8 | 111.2 |
| 66 | 23.7 | 34.6 | 26.3 | 331.5 | 99.5  | 34.6 | 32.6 | 71.2  | 181.4 | 138.2 | 241.5 | 108.2 |
| 67 | 22.9 | 23.5 | 29.3 | 360.9 | 77.3  | 32.6 | 50.8 | 90.4  | 177.4 | 128.1 | 249.7 | 98.1  |
| 68 | 22.9 | 22.5 | 32.4 | 298.3 | 70.2  | 23.5 | 54.8 | 60.1  | 168.4 | 104.0 | 256.8 | 101.2 |
| 69 | 27.9 | 27.5 | 33.4 | 318.6 | 81.4  | 28.5 | 44.7 | 68.2  | 168.4 | 105.8 | 268.0 | 97.1  |
| 70 | 27.9 | 20.4 | 20.2 | 339.9 | 67.2  | 18.4 | 47.8 | 69.2  | 170.4 | 132.2 | 259.9 | 83.0  |
| 71 | 20.9 | 22.5 | 16.2 | 299.4 | 83.4  | 21.5 | 52.8 | 80.4  | 151.2 | 134.2 | 261.0 | 99.2  |
| 72 | 30.0 | 28.6 | 37.5 | 324.8 | 87.5  | 33.6 | 47.8 | 69.3  | 165.4 | 100.8 | 274.2 | 84.0  |
| 73 | 19.8 | 30.6 | 18.2 | 309.7 | 81.4  | 35.6 | 48.8 | 73.3  | 166.5 | 120.1 | 240.8 | 107.3 |
| 74 | 24.9 | 27.5 | 30.4 | 307.7 | 88.5  | 33.6 | 43.8 | 64.2  | 127.0 | 132.3 | 250.0 | 125.6 |
| 75 | 32.0 | 15.4 | 21.3 | 279.4 | 90.6  | 33.6 | 44.8 | 77.4  | 151.7 | 130.3 | 252.0 | 93.2  |
| 76 | 12.4 | 29.6 | 15.2 | 264.2 | 81.5  | 24.5 | 37.7 | 62.2  | 130.5 | 111.0 | 243.0 | 105.4 |
| 77 | 29.4 | 22.5 | 23.3 | 295.7 | 77.4  | 37.7 | 43.8 | 83.9  | 143.9 | 106.0 | 241.0 | 100.3 |
| 78 | 18.2 | 27.6 | 13.2 | 296.8 | 76.4  | 16.4 | 48.9 | 54.5  | 134.8 | 96.9  | 272.4 | 94.3  |
| 79 | 26.4 | 27.6 | 15.2 | 322.1 | 80.3  | 29.6 | 32.6 | 55.5  | 156.1 | 103.0 | 228.9 | 103.4 |
| 80 | 21.5 | 20.5 | 20.3 | 321.2 | 76.2  | 15.4 | 43.8 | 76.8  | 129.8 | 119.2 | 239.1 | 125.7 |



Whole Lung Tc-SC Counts (CF HS)

| Frame | Patient |        |        |        |         |         |        |        |        |        |        |  |
|-------|---------|--------|--------|--------|---------|---------|--------|--------|--------|--------|--------|--|
|       | 1       | 2      | 3      | 4      | 6       | 7       | 8      | 9      | 10     | 11     | 12     |  |
| 1     | 782.37  | 544.84 | 854.95 | 2490.8 | 1400.92 | 1834.29 | 3649.6 | 6223.9 | 1570.9 | 6946.5 | 2259.5 |  |
| 2     | 797.59  | 582.34 | 929.15 | 2407.0 | 1413.96 | 1850.51 | 3534.9 | 6334.3 | 1614.5 | 6957.9 | 2107.1 |  |
| 3     | 788.05  | 465.76 | 804.04 | 2431.6 | 1513.24 | 1853.91 | 3459.0 | 6498.3 | 1532.3 | 6781.0 | 2244.4 |  |
| 4     | 770.15  | 470.12 | 772.21 | 2379.9 | 1504.16 | 1916.02 | 3394.2 | 6270.9 | 1613.5 | 6790.0 | 1998.6 |  |
| 5     | 751.17  | 428.26 | 737.62 | 2373.4 | 1396.47 | 1825.31 | 3121.5 | 6240.3 | 1558.8 | 6440.3 | 1965.5 |  |
| 6     | 742.19  | 480.85 | 732.70 | 2393.6 | 1428.58 | 1924.18 | 3016.4 | 6173.9 | 1519.3 | 6258.3 | 1961.5 |  |
| 7     | 756.83  | 463.18 | 683.96 | 2320.0 | 1457.75 | 1783.50 | 3111.4 | 6312.9 | 1537.3 | 6433.1 | 1959.5 |  |
| 8     | 734.70  | 454.97 | 781.51 | 2252.0 | 1485.94 | 1894.73 | 3105.6 | 6357.1 | 1524.8 | 6348.0 | 1955.3 |  |
| 9     | 730.75  | 414.13 | 663.61 | 2442.7 | 1503.07 | 1820.67 | 2751.3 | 6183.5 | 1555.6 | 6365.9 | 1883.1 |  |
| 10    | 747.44  | 421.00 | 721.88 | 2273.1 | 1455.05 | 1840.75 | 2828.4 | 6144.4 | 1446.1 | 6280.6 | 1971.0 |  |
| 11    | 787.66  | 402.17 | 724.42 | 2293.0 | 1310.14 | 1739.05 | 2719.1 | 6278.9 | 1453.0 | 6008.4 | 1803.9 |  |
| 12    | 691.45  | 424.57 | 629.18 | 2325.1 | 1334.99 | 1724.86 | 2743.3 | 6026.9 | 1481.7 | 5481.4 | 1817.8 |  |
| 13    | 684.26  | 410.71 | 602.00 | 2275.1 | 1410.54 | 1720.80 | 2670.7 | 5933.1 | 1336.7 | 5655.2 | 1844.3 |  |
| 14    | 635.55  | 322.71 | 677.52 | 2151.5 | 1413.75 | 1672.22 | 2678.9 | 5945.0 | 1454.4 | 5341.1 | 1751.0 |  |
| 15    | 744.74  | 362.80 | 651.53 | 2219.1 | 1433.93 | 1598.08 | 2670.7 | 5980.1 | 1205.9 | 5084.0 | 1758.7 |  |
| 16    | 654.75  | 404.02 | 643.54 | 1967.3 | 1357.45 | 1426.18 | 2619.3 | 5719.7 | 1256.8 | 5009.9 | 1760.4 |  |
| 17    | 703.67  | 408.72 | 640.90 | 1717.2 | 1324.56 | 1734.63 | 2577.0 | 5780.3 | 1256.6 | 4758.2 | 1713.8 |  |
| 18    | 681.65  | 355.26 | 698.29 | 1732.7 | 1341.06 | 1527.12 | 2471.9 | 5998.1 | 1279.4 | 4700.8 | 1668.4 |  |
| 19    | 699.65  | 327.26 | 625.42 | 1651.6 | 1414.15 | 1557.34 | 2541.1 | 5948.2 | 1214.2 | 4507.4 | 1653.0 |  |
| 20    | 692.95  | 309.54 | 612.80 | 1563.4 | 1246.50 | 1586.77 | 2541.3 | 5908.4 | 1180.4 | 4211.5 | 1568.6 |  |
| 21    | 703.29  | 368.76 | 571.10 | 1524.1 | 1265.67 | 1450.01 | 2540.9 | 6060.9 | 1207.0 | 4051.4 | 1749.4 |  |
| 22    | 607.95  | 340.53 | 628.16 | 1357.8 | 1178.00 | 1500.49 | 2516.3 | 5886.9 | 1369.9 | 3975.2 | 1751.5 |  |
| 23    | 590.93  | 345.22 | 694.07 | 1308.2 | 1229.24 | 1517.61 | 2365.5 | 5497.7 | 1287.2 | 3979.2 | 1668.0 |  |
| 24    | 596.21  | 387.19 | 650.28 | 1346.4 | 1263.97 | 1600.17 | 2482.9 | 5602.9 | 1232.4 | 4103.2 | 1681.6 |  |
| 25    | 511.27  | 378.66 | 657.81 | 1314.1 | 1143.37 | 1372.13 | 2369.8 | 5731.9 | 1225.7 | 4104.7 | 1635.5 |  |
| 26    | 600.55  | 359.37 | 592.82 | 1202.2 | 1108.87 | 1520.99 | 2404.8 | 5820.3 | 1216.0 | 3974.7 | 1538.8 |  |
| 27    | 658.12  | 357.96 | 649.45 | 1242.7 | 1147.47 | 1495.51 | 2458.4 | 5792.2 | 1139.4 | 3797.8 | 1604.8 |  |
| 28    | 629.00  | 292.85 | 684.45 | 1210.3 | 1190.60 | 1389.75 | 2251.8 | 5861.6 | 1116.0 | 4103.4 | 1656.7 |  |
| 29    | 552.58  | 416.56 | 644.85 | 1199.6 | 1111.79 | 1520.37 | 2250.9 | 5885.1 | 1163.9 | 3874.0 | 1563.3 |  |
| 30    | 675.45  | 377.38 | 701.82 | 1226.4 | 1220.29 | 1506.02 | 2285.5 | 5830.5 | 1051.8 | 3908.9 | 1602.6 |  |
| 31    | 587.50  | 274.57 | 713.35 | 1106.6 | 1115.77 | 1586.09 | 2247.1 | 5812.2 | 1104.3 | 3799.7 | 1606.2 |  |
| 32    | 607.76  | 312.54 | 572.98 | 1196.0 | 1190.10 | 1402.66 | 2271.9 | 5878.0 | 1048.9 | 3772.1 | 1584.5 |  |
| 33    | 567.11  | 243.66 | 582.70 | 1142.9 | 1306.26 | 1583.41 | 2083.3 | 5795.7 | 1008.8 | 3758.0 | 1696.0 |  |
| 34    | 641.51  | 288.08 | 610.67 | 1105.8 | 1198.97 | 1451.23 | 1996.2 | 5775.0 | 973.7  | 3900.2 | 1571.4 |  |
| 35    | 605.87  | 320.62 | 637.84 | 956.9  | 1178.72 | 1386.86 | 2076.9 | 6056.4 | 1056.9 | 3863.7 | 1567.3 |  |
| 36    | 565.06  | 239.39 | 620.94 | 1009.6 | 1090.39 | 1490.15 | 2056.2 | 5979.1 | 1117.2 | 3766.4 | 1570.3 |  |
| 37    | 581.36  | 275.46 | 589.56 | 1083.5 | 1180.69 | 1476.99 | 2147.3 | 5736.1 | 879.8  | 3846.2 | 1636.3 |  |
| 38    | 559.80  | 322.23 | 668.20 | 959.3  | 1158.54 | 1452.93 | 2075.0 | 5716.3 | 948.4  | 3705.2 | 1613.2 |  |
| 39    | 560.68  | 229.47 | 568.96 | 1056.8 | 1088.65 | 1512.73 | 2063.5 | 5538.5 | 989.8  | 3780.4 | 1615.9 |  |
| 40    | 558.24  | 266.77 | 569.20 | 1020.7 | 1143.68 | 1406.84 | 2104.2 | 5712.8 | 951.7  | 3889.0 | 1653.7 |  |

|    |        |        |        |       |         |         |        |        |       |        |        |
|----|--------|--------|--------|-------|---------|---------|--------|--------|-------|--------|--------|
| 41 | 520.22 | 236.28 | 647.56 | 874.1 | 1097.30 | 1469.58 | 2009.4 | 5610.9 | 964.1 | 3919.4 | 1577.5 |
| 42 | 549.78 | 261.42 | 613.58 | 957.3 | 1113.53 | 1484.64 | 2128.2 | 5689.0 | 879.4 | 3812.1 | 1466.0 |
| 43 | 561.06 | 314.95 | 685.96 | 965.9 | 1010.70 | 1501.40 | 1905.2 | 5571.7 | 902.5 | 3814.2 | 1508.3 |
| 44 | 551.73 | 208.60 | 639.26 | 853.7 | 1110.71 | 1478.32 | 2049.5 | 5514.4 | 882.0 | 3688.9 | 1505.0 |
| 45 | 579.86 | 272.27 | 621.06 | 948.5 | 1079.22 | 1415.12 | 2079.6 | 5695.2 | 825.7 | 3822.7 | 1524.9 |
| 46 | 583.92 | 238.84 | 642.38 | 922.4 | 1147.24 | 1392.59 | 2073.3 | 5746.5 | 966.5 | 3913.2 | 1501.9 |
| 47 | 547.58 | 221.26 | 571.97 | 933.3 | 1067.39 | 1507.64 | 2017.1 | 5593.8 | 895.2 | 3716.0 | 1516.8 |
| 48 | 479.04 | 207.92 | 574.03 | 842.1 | 1157.10 | 1461.87 | 1963.7 | 5654.1 | 862.8 | 3742.8 | 1557.5 |
| 49 | 602.74 | 169.39 | 664.86 | 923.0 | 1126.39 | 1470.27 | 2074.9 | 5683.0 | 900.1 | 3676.0 | 1488.6 |
| 50 | 538.45 | 206.14 | 500.11 | 859.8 | 1203.72 | 1455.84 | 1982.4 | 5498.9 | 861.8 | 3698.2 | 1593.5 |
| 51 | 526.91 | 232.31 | 585.39 | 736.6 | 1110.99 | 1455.98 | 1963.4 | 5666.3 | 868.8 | 3583.7 | 1357.2 |
| 52 | 492.29 | 245.92 | 529.58 | 898.9 | 1136.23 | 1395.03 | 2045.1 | 5719.8 | 860.9 | 3624.9 | 1437.1 |
| 53 | 538.76 | 179.26 | 505.29 | 843.2 | 1098.81 | 1517.87 | 2005.7 | 5732.5 | 853.7 | 3510.3 | 1437.8 |
| 54 | 468.67 | 255.89 | 531.14 | 884.1 | 1137.81 | 1599.08 | 1875.4 | 5394.0 | 891.6 | 3680.1 | 1500.3 |
| 55 | 542.76 | 244.69 | 639.09 | 811.6 | 1167.52 | 1501.20 | 1951.9 | 5476.4 | 821.0 | 3510.2 | 1464.7 |
| 56 | 454.26 | 207.79 | 702.05 | 842.4 | 1168.35 | 1504.92 | 1937.6 | 5460.3 | 834.0 | 3652.8 | 1542.3 |
| 57 | 546.29 | 194.56 | 678.21 | 788.4 | 1128.64 | 1550.42 | 1900.4 | 5626.9 | 814.2 | 3510.1 | 1503.8 |
| 58 | 467.60 | 143.87 | 616.16 | 814.5 | 1090.73 | 1567.47 | 1968.0 | 5624.7 | 864.7 | 3684.7 | 1497.1 |
| 59 | 538.55 | 166.78 | 593.45 | 711.7 | 1096.80 | 1496.25 | 1867.5 | 5626.0 | 911.8 | 3706.5 | 1507.5 |
| 60 | 453.44 | 162.86 | 564.59 | 725.2 | 1146.01 | 1524.86 | 1873.4 | 5501.2 | 799.6 | 3577.2 | 1504.2 |
| 61 | 491.84 | 222.01 | 626.47 | 702.7 | 1187.49 | 1336.93 | 1876.6 | 5682.4 | 870.8 | 3465.1 | 1534.9 |
| 62 | 558.24 | 142.13 | 633.09 | 801.3 | 1053.96 | 1442.82 | 1913.0 | 5595.0 | 932.5 | 3450.9 | 1486.3 |
| 63 | 577.50 | 166.59 | 611.88 | 658.8 | 1110.53 | 1429.61 | 1809.0 | 5331.4 | 753.2 | 3439.9 | 1460.0 |
| 64 | 454.32 | 156.15 | 596.69 | 686.0 | 1143.85 | 1361.23 | 1784.3 | 5560.2 | 845.2 | 3369.7 | 1534.8 |
| 65 | 547.53 | 135.61 | 501.17 | 668.0 | 1156.73 | 1353.54 | 1720.8 | 5571.7 | 816.1 | 3404.3 | 1480.5 |
| 66 | 498.93 | 196.96 | 588.67 | 664.5 | 1092.12 | 1412.17 | 1757.3 | 5569.4 | 846.9 | 3473.4 | 1482.7 |
| 67 | 495.50 | 159.07 | 595.10 | 647.5 | 1111.51 | 1319.62 | 1786.7 | 5450.7 | 850.1 | 3472.2 | 1473.2 |
| 68 | 570.22 | 167.30 | 595.07 | 622.0 | 1012.75 | 1502.23 | 1858.0 | 5473.2 | 828.2 | 3532.8 | 1470.8 |
| 69 | 489.61 | 207.97 | 646.19 | 563.6 | 1110.15 | 1401.24 | 1787.9 | 5467.0 | 721.2 | 3547.6 | 1459.2 |
| 70 | 539.46 | 185.89 | 591.80 | 636.8 | 1101.53 | 1317.54 | 1686.9 | 5515.3 | 863.6 | 3528.6 | 1515.0 |
| 71 | 530.69 | 150.58 | 579.87 | 584.3 | 1116.70 | 1340.13 | 1765.5 | 5580.4 | 863.7 | 3473.4 | 1453.5 |
| 72 | 523.42 | 170.63 | 594.62 | 615.3 | 1034.26 | 1443.94 | 1607.0 | 5437.3 | 865.5 | 3561.9 | 1492.9 |
| 73 | 494.87 | 202.51 | 652.33 | 595.3 | 1079.59 | 1392.50 | 1824.9 | 5608.4 | 853.5 | 3362.6 | 1515.1 |
| 74 | 517.41 | 206.05 | 693.41 | 553.3 | 1013.18 | 1427.96 | 1794.2 | 5644.4 | 777.3 | 3428.9 | 1351.9 |
| 75 | 495.17 | 217.14 | 639.62 | 676.9 | 1031.41 | 1336.92 | 1527.9 | 5542.5 | 817.5 | 3393.5 | 1458.9 |
| 76 | 528.25 | 196.53 | 663.69 | 655.2 | 1139.18 | 1444.97 | 1580.0 | 5655.4 | 832.7 | 3359.5 | 1510.6 |
| 77 | 497.16 | 174.19 | 677.38 | 635.9 | 1030.59 | 1391.94 | 1604.0 | 5576.6 | 810.5 | 3296.5 | 1524.0 |
| 78 | 550.91 | 145.95 | 649.15 | 606.5 | 1069.57 | 1362.30 | 1573.5 | 5489.0 | 825.0 | 3172.8 | 1490.2 |
| 79 | 417.19 | 167.37 | 582.88 | 548.5 | 1082.83 | 1352.86 | 1598.3 | 5552.1 | 830.5 | 3447.4 | 1470.0 |
| 80 | 460.24 | 171.79 | 542.35 | 543.4 | 1007.83 | 1422.72 | 1633.2 | 5621.6 | 735.6 | 3427.3 | 1475.0 |

Central Lung Tc-SC Counts (CF HS)

| Frame | Patient |        |        |        |        |        |        |        |       |        |        |
|-------|---------|--------|--------|--------|--------|--------|--------|--------|-------|--------|--------|
|       | 1       | 2      | 3      | 4      | 6      | 7      | 8      | 9      | 10    | 11     | 12     |
| 1     | 373.79  | 245.87 | 355.08 | 1368.8 | 607.86 | 886.29 | 1773.4 | 2653.6 | 766.0 | 3437.5 | 1126.5 |
| 2     | 349.11  | 212.69 | 377.32 | 1316.5 | 608.10 | 864.90 | 1760.4 | 2609.9 | 734.3 | 3255.0 | 1020.6 |
| 3     | 358.83  | 196.00 | 298.27 | 1358.4 | 735.27 | 878.49 | 1623.0 | 2737.9 | 669.5 | 3102.8 | 1132.6 |
| 4     | 349.40  | 163.02 | 307.48 | 1299.6 | 695.22 | 914.05 | 1638.7 | 2592.0 | 739.7 | 3005.8 | 991.5  |
| 5     | 360.96  | 195.56 | 260.78 | 1223.9 | 584.75 | 868.65 | 1426.4 | 2518.0 | 747.6 | 2858.7 | 980.1  |
| 6     | 253.49  | 198.71 | 277.43 | 1293.0 | 604.30 | 926.61 | 1368.2 | 2669.7 | 691.2 | 2684.3 | 968.8  |
| 7     | 315.54  | 179.83 | 263.50 | 1261.7 | 657.85 | 815.30 | 1401.9 | 2739.1 | 710.6 | 2761.1 | 915.6  |
| 8     | 304.22  | 172.01 | 294.74 | 1246.4 | 692.84 | 860.26 | 1325.6 | 2692.3 | 633.2 | 2798.3 | 964.4  |
| 9     | 306.61  | 156.06 | 245.27 | 1362.2 | 706.19 | 911.90 | 1227.3 | 2665.0 | 696.9 | 2661.3 | 927.1  |
| 10    | 343.55  | 174.67 | 258.46 | 1238.4 | 593.89 | 864.54 | 1186.0 | 2526.4 | 621.9 | 2711.2 | 924.5  |
| 11    | 315.53  | 131.40 | 302.74 | 1134.2 | 584.96 | 750.93 | 1075.8 | 2605.8 | 626.5 | 2463.8 | 717.9  |
| 12    | 287.87  | 110.43 | 231.55 | 1158.3 | 568.38 | 744.41 | 1108.2 | 2481.2 | 655.0 | 2247.0 | 727.6  |
| 13    | 271.14  | 132.17 | 218.69 | 1106.7 | 507.30 | 735.85 | 1081.8 | 2450.6 | 597.8 | 2206.9 | 848.6  |
| 14    | 274.02  | 90.61  | 236.43 | 1131.8 | 560.43 | 745.89 | 1074.1 | 2426.3 | 618.4 | 2132.8 | 724.3  |
| 15    | 322.19  | 121.85 | 222.16 | 955.4  | 564.73 | 699.44 | 1071.0 | 2436.6 | 519.0 | 1913.5 | 701.9  |
| 16    | 290.80  | 143.73 | 206.13 | 924.9  | 505.33 | 639.58 | 1140.7 | 2265.5 | 533.4 | 1837.7 | 732.4  |
| 17    | 275.87  | 125.14 | 220.99 | 789.6  | 503.24 | 735.74 | 945.5  | 2252.6 | 480.0 | 1771.2 | 694.3  |
| 18    | 308.21  | 106.48 | 247.52 | 770.9  | 497.14 | 633.81 | 879.8  | 2298.4 | 501.3 | 1769.6 | 712.1  |
| 19    | 269.39  | 102.54 | 273.79 | 756.7  | 506.89 | 734.49 | 1121.8 | 2294.9 | 499.5 | 1604.5 | 630.5  |
| 20    | 260.87  | 82.27  | 216.53 | 618.7  | 374.41 | 642.04 | 1056.5 | 2279.2 | 467.0 | 1594.9 | 635.4  |
| 21    | 273.97  | 108.37 | 199.83 | 602.5  | 439.86 | 670.08 | 1126.9 | 2474.9 | 484.4 | 1502.2 | 696.8  |
| 22    | 238.07  | 126.03 | 271.32 | 493.3  | 370.13 | 695.31 | 1201.4 | 2313.1 | 595.2 | 1537.6 | 709.8  |
| 23    | 236.71  | 98.92  | 255.12 | 517.2  | 424.82 | 690.02 | 1084.6 | 2294.5 | 567.4 | 1461.5 | 698.2  |
| 24    | 247.09  | 126.43 | 298.03 | 566.9  | 432.11 | 756.98 | 1232.7 | 2239.4 | 546.0 | 1526.1 | 689.3  |
| 25    | 218.23  | 135.15 | 224.71 | 586.9  | 376.10 | 640.21 | 1073.0 | 2260.6 | 506.2 | 1644.9 | 656.5  |
| 26    | 185.84  | 98.67  | 276.05 | 536.2  | 345.56 | 673.75 | 1115.9 | 2349.8 | 540.7 | 1496.3 | 642.4  |
| 27    | 222.73  | 117.77 | 284.65 | 520.1  | 428.82 | 638.62 | 1210.3 | 2314.8 | 483.5 | 1452.0 | 686.2  |
| 28    | 271.10  | 90.37  | 219.08 | 567.6  | 398.77 | 615.92 | 1034.3 | 2425.5 | 441.3 | 1529.3 | 701.6  |
| 29    | 207.86  | 116.61 | 281.28 | 545.9  | 418.06 | 701.43 | 1041.0 | 2260.9 | 441.8 | 1512.2 | 652.3  |
| 30    | 259.70  | 113.15 | 240.79 | 602.5  | 444.00 | 658.61 | 1166.9 | 2220.8 | 428.7 | 1517.2 | 725.7  |
| 31    | 244.33  | 105.20 | 316.35 | 533.9  | 391.71 | 700.74 | 1019.9 | 2345.1 | 419.6 | 1584.9 | 693.0  |
| 32    | 236.10  | 104.89 | 235.46 | 582.5  | 405.11 | 599.15 | 1106.2 | 2299.0 | 392.4 | 1536.7 | 670.2  |
| 33    | 235.44  | 80.04  | 288.57 | 524.2  | 469.71 | 747.16 | 920.0  | 2242.9 | 367.0 | 1495.7 | 673.0  |
| 34    | 228.42  | 81.49  | 325.51 | 522.5  | 426.98 | 609.00 | 924.8  | 2157.9 | 366.2 | 1579.1 | 684.0  |
| 35    | 230.16  | 76.86  | 359.56 | 432.5  | 413.02 | 682.75 | 939.0  | 2299.9 | 401.4 | 1659.5 | 658.5  |
| 36    | 211.13  | 59.31  | 330.34 | 468.6  | 394.96 | 670.92 | 893.8  | 2309.9 | 400.9 | 1628.5 | 669.4  |
| 37    | 245.24  | 83.03  | 315.86 | 428.7  | 415.08 | 620.26 | 865.5  | 2214.5 | 309.9 | 1496.1 | 701.8  |
| 38    | 217.19  | 94.46  | 364.90 | 507.2  | 405.49 | 707.43 | 944.4  | 2299.0 | 325.8 | 1534.2 | 701.8  |
| 39    | 210.66  | 42.97  | 367.99 | 501.4  | 365.64 | 711.42 | 847.0  | 2283.9 | 339.1 | 1625.3 | 727.4  |
| 40    | 200.55  | 92.34  | 289.33 | 531.0  | 349.07 | 638.34 | 878.6  | 2421.4 | 306.5 | 1587.6 | 802.1  |

|    |        |        |        |       |        |        |       |        |       |        |       |
|----|--------|--------|--------|-------|--------|--------|-------|--------|-------|--------|-------|
| 41 | 204.18 | 45.82  | 294.53 | 434.6 | 383.70 | 637.35 | 733.6 | 2313.3 | 342.1 | 1568.7 | 712.9 |
| 42 | 191.29 | 72.76  | 340.61 | 474.7 | 370.11 | 637.53 | 880.9 | 2321.8 | 314.0 | 1566.3 | 644.7 |
| 43 | 213.60 | 88.57  | 339.90 | 497.2 | 347.78 | 707.43 | 795.8 | 2222.9 | 323.2 | 1615.3 | 663.8 |
| 44 | 200.20 | 91.25  | 308.87 | 432.1 | 407.10 | 711.73 | 813.9 | 2314.2 | 288.5 | 1568.5 | 683.8 |
| 45 | 221.49 | 108.25 | 306.19 | 483.2 | 348.35 | 639.43 | 899.9 | 2471.0 | 272.7 | 1707.5 | 737.4 |
| 46 | 208.52 | 55.32  | 339.73 | 418.0 | 429.97 | 658.33 | 902.4 | 2399.4 | 297.5 | 1626.0 | 696.8 |
| 47 | 256.58 | 53.24  | 347.69 | 441.8 | 399.59 | 657.27 | 730.6 | 2504.0 | 288.8 | 1591.2 | 708.2 |
| 48 | 189.06 | 79.80  | 317.23 | 388.8 | 422.44 | 679.16 | 724.8 | 2500.0 | 258.9 | 1688.1 | 749.2 |
| 49 | 198.26 | 38.31  | 390.96 | 435.0 | 364.93 | 708.55 | 808.7 | 2541.3 | 311.3 | 1599.8 | 697.5 |
| 50 | 201.03 | 71.30  | 235.87 | 423.2 | 435.96 | 623.84 | 857.9 | 2323.9 | 278.1 | 1587.5 | 764.5 |
| 51 | 199.02 | 104.03 | 317.24 | 359.7 | 426.15 | 656.47 | 823.6 | 2193.1 | 267.3 | 1554.2 | 678.0 |
| 52 | 213.38 | 100.34 | 247.91 | 417.6 | 392.68 | 671.03 | 852.1 | 2280.7 | 276.6 | 1591.2 | 711.0 |
| 53 | 189.49 | 60.49  | 292.28 | 439.2 | 378.80 | 699.69 | 823.1 | 2204.1 | 223.0 | 1673.4 | 709.7 |
| 54 | 164.72 | 115.09 | 299.49 | 396.8 | 401.37 | 738.89 | 690.3 | 2026.2 | 280.7 | 1623.0 | 781.7 |
| 55 | 178.82 | 95.85  | 316.44 | 398.4 | 403.49 | 743.23 | 622.0 | 2013.4 | 257.6 | 1598.9 | 765.1 |
| 56 | 171.94 | 103.25 | 372.23 | 389.2 | 410.94 | 687.07 | 648.9 | 2038.0 | 269.0 | 1678.2 | 774.0 |
| 57 | 210.19 | 85.16  | 343.83 | 395.2 | 386.08 | 736.83 | 711.4 | 2113.7 | 223.0 | 1516.5 | 742.2 |
| 58 | 171.24 | 51.02  | 356.49 | 384.9 | 389.88 | 725.74 | 880.4 | 2134.2 | 291.8 | 1687.6 | 780.8 |
| 59 | 201.21 | 76.77  | 325.54 | 337.1 | 416.71 | 722.61 | 859.1 | 1972.9 | 277.3 | 1648.4 | 754.1 |
| 60 | 148.39 | 82.28  | 320.51 | 317.8 | 384.19 | 755.60 | 770.7 | 1898.7 | 245.0 | 1681.7 | 720.1 |
| 61 | 189.67 | 106.82 | 351.33 | 302.2 | 437.07 | 706.48 | 875.9 | 2219.1 | 253.1 | 1541.7 | 765.6 |
| 62 | 203.79 | 68.25  | 307.44 | 353.1 | 381.95 | 693.58 | 826.6 | 2063.6 | 291.5 | 1386.2 | 719.8 |
| 63 | 199.96 | 77.11  | 347.17 | 323.0 | 420.40 | 690.30 | 799.9 | 2003.2 | 244.5 | 1427.8 | 769.3 |
| 64 | 182.30 | 103.17 | 351.48 | 323.9 | 382.28 | 682.38 | 760.7 | 2102.5 | 255.6 | 1387.8 | 786.9 |
| 65 | 199.84 | 57.91  | 319.20 | 259.7 | 359.78 | 647.25 | 793.4 | 2039.1 | 234.0 | 1348.3 | 749.7 |
| 66 | 239.59 | 81.80  | 331.02 | 270.7 | 307.49 | 705.12 | 785.1 | 2049.7 | 255.8 | 1445.2 | 765.7 |
| 67 | 162.05 | 61.00  | 322.56 | 255.8 | 316.19 | 647.11 | 756.2 | 2080.5 | 271.9 | 1413.2 | 722.1 |
| 68 | 189.95 | 79.54  | 324.11 | 209.7 | 308.57 | 770.12 | 809.1 | 1922.5 | 270.1 | 1435.9 | 723.5 |
| 69 | 183.12 | 80.79  | 369.34 | 269.1 | 294.17 | 745.10 | 722.6 | 2016.9 | 214.8 | 1471.8 | 709.0 |
| 70 | 196.60 | 68.76  | 349.02 | 244.6 | 380.29 | 692.20 | 706.2 | 2055.6 | 258.6 | 1498.6 | 712.5 |
| 71 | 237.02 | 45.98  | 345.10 | 221.8 | 362.79 | 668.12 | 797.0 | 2002.5 | 304.5 | 1486.6 | 679.7 |
| 72 | 218.90 | 73.56  | 353.93 | 239.1 | 321.06 | 772.85 | 656.8 | 1969.1 | 306.6 | 1464.2 | 787.6 |
| 73 | 194.88 | 84.31  | 320.55 | 177.0 | 372.73 | 668.59 | 769.0 | 1991.3 | 292.2 | 1461.7 | 716.6 |
| 74 | 199.56 | 93.68  | 389.81 | 230.5 | 305.52 | 689.70 | 699.9 | 2033.7 | 265.4 | 1522.6 | 697.0 |
| 75 | 187.84 | 92.46  | 320.53 | 251.9 | 355.14 | 665.72 | 594.1 | 2036.2 | 245.4 | 1455.4 | 794.0 |
| 76 | 207.82 | 100.38 | 322.56 | 230.4 | 389.10 | 756.60 | 588.4 | 2019.8 | 263.0 | 1382.0 | 773.4 |
| 77 | 170.97 | 62.08  | 365.79 | 247.7 | 325.86 | 670.20 | 570.4 | 1958.9 | 297.0 | 1341.9 | 773.4 |
| 78 | 177.66 | 63.06  | 341.65 | 231.7 | 325.89 | 680.77 | 515.8 | 1920.5 | 245.1 | 1375.6 | 754.0 |
| 79 | 207.03 | 75.11  | 336.49 | 240.3 | 375.31 | 660.32 | 531.8 | 1990.7 | 282.5 | 1519.7 | 737.9 |
| 80 | 230.74 | 62.18  | 325.95 | 199.1 | 305.60 | 671.12 | 712.3 | 1980.0 | 221.8 | 1426.4 | 743.5 |

Whole Lung In-DTPA Counts (CF HS)

| Frame | Patient |        |        |        |        |        |        |        |        |         |        |
|-------|---------|--------|--------|--------|--------|--------|--------|--------|--------|---------|--------|
|       | 1       | 2      | 3      | 4      | 6      | 7      | 8      | 9      | 10     | 11      | 12     |
| 1     | 133.42  | 94.02  | 131.42 | 366.06 | 213.04 | 346.46 | 633.51 | 896.15 | 224.64 | 1327.83 | 395.47 |
| 2     | 104.44  | 119.04 | 181.46 | 372.13 | 203.27 | 335.52 | 656.63 | 953.33 | 229.68 | 1224.62 | 379.53 |
| 3     | 111.46  | 100.05 | 178.49 | 372.19 | 170.29 | 294.55 | 630.73 | 910.47 | 255.73 | 1310.88 | 384.60 |
| 4     | 134.49  | 94.07  | 165.51 | 336.23 | 185.33 | 253.57 | 617.82 | 882.61 | 220.75 | 1264.07 | 380.66 |
| 5     | 113.50  | 94.08  | 130.71 | 351.30 | 161.34 | 278.64 | 608.92 | 829.71 | 231.80 | 1193.23 | 379.73 |
| 6     | 90.49   | 93.10  | 155.76 | 327.34 | 177.38 | 291.70 | 543.96 | 857.88 | 243.85 | 1187.42 | 403.82 |
| 7     | 123.55  | 72.09  | 136.76 | 356.43 | 151.38 | 289.75 | 545.06 | 911.10 | 227.87 | 1260.72 | 365.84 |
| 8     | 81.51   | 78.11  | 139.79 | 329.45 | 176.44 | 261.76 | 547.15 | 816.12 | 245.94 | 1129.75 | 336.86 |
| 9     | 110.57  | 81.13  | 133.81 | 338.52 | 151.43 | 264.81 | 517.20 | 775.20 | 246.98 | 1106.91 | 352.95 |
| 10    | 131.63  | 83.14  | 127.82 | 324.56 | 179.51 | 257.84 | 468.20 | 771.32 | 195.94 | 1147.17 | 254.84 |
| 11    | 107.60  | 62.12  | 138.86 | 346.65 | 150.48 | 221.82 | 428.21 | 786.49 | 192.96 | 1136.35 | 335.03 |
| 12    | 90.59   | 77.16  | 120.85 | 339.70 | 152.51 | 246.91 | 505.44 | 706.46 | 189.99 | 1059.38 | 331.08 |
| 13    | 98.62   | 42.09  | 143.52 | 329.74 | 166.17 | 232.92 | 466.44 | 743.66 | 203.05 | 1042.53 | 314.10 |
| 14    | 74.58   | 66.16  | 118.69 | 304.73 | 150.16 | 263.03 | 385.33 | 755.82 | 200.08 | 945.47  | 281.08 |
| 15    | 117.70  | 60.16  | 135.75 | 312.81 | 137.15 | 204.93 | 426.50 | 776.00 | 176.05 | 826.33  | 268.09 |
| 16    | 106.69  | 60.17  | 129.76 | 281.77 | 154.22 | 210.98 | 411.53 | 722.99 | 206.17 | 877.61  | 263.12 |
| 17    | 92.67   | 60.18  | 100.69 | 254.74 | 138.20 | 215.03 | 401.57 | 739.16 | 170.10 | 779.47  | 268.18 |
| 18    | 94.69   | 79.25  | 124.79 | 229.71 | 160.30 | 177.95 | 375.56 | 684.11 | 175.14 | 766.57  | 265.22 |
| 19    | 79.66   | 61.20  | 95.71  | 207.68 | 139.25 | 185.00 | 409.74 | 706.30 | 187.21 | 709.51  | 247.21 |
| 20    | 94.73   | 45.16  | 118.81 | 203.70 | 140.28 | 187.04 | 353.61 | 670.90 | 189.25 | 636.38  | 250.26 |
| 21    | 61.62   | 45.16  | 134.89 | 195.71 | 143.32 | 177.04 | 381.78 | 740.27 | 177.24 | 589.32  | 272.38 |
| 22    | 70.67   | 79.30  | 119.85 | 192.73 | 157.39 | 175.06 | 358.75 | 688.60 | 167.23 | 629.58  | 218.22 |
| 23    | 75.70   | 64.25  | 97.79  | 179.71 | 120.27 | 157.02 | 351.79 | 723.86 | 166.26 | 564.43  | 216.25 |
| 24    | 84.75   | 72.30  | 104.83 | 172.71 | 101.22 | 170.10 | 349.84 | 612.52 | 157.25 | 549.46  | 232.36 |
| 25    | 56.64   | 60.26  | 108.87 | 166.71 | 99.23  | 146.03 | 305.71 | 651.80 | 156.27 | 574.66  | 230.39 |
| 26    | 89.80   | 57.26  | 106.88 | 149.67 | 114.31 | 165.14 | 317.82 | 619.76 | 178.40 | 539.61  | 242.48 |
| 27    | 71.73   | 69.32  | 83.79  | 160.74 | 97.25  | 171.19 | 343.99 | 630.92 | 160.34 | 536.69  | 207.36 |
| 28    | 63.71   | 65.31  | 98.88  | 157.76 | 91.24  | 151.13 | 351.09 | 691.32 | 142.28 | 519.70  | 242.56 |
| 29    | 81.81   | 59.30  | 107.94 | 158.79 | 96.28  | 144.12 | 311.95 | 631.14 | 157.38 | 542.90  | 232.56 |
| 30    | 77.80   | 59.31  | 134.09 | 151.78 | 115.39 | 148.16 | 318.04 | 677.49 | 137.31 | 544.00  | 223.55 |
| 31    | 74.80   | 55.29  | 84.85  | 144.77 | 108.58 | 172.32 | 297.98 | 665.54 | 135.32 | 491.81  | 202.48 |
| 32    | 67.77   | 50.28  | 110.00 | 153.84 | 107.59 | 161.28 | 344.29 | 650.57 | 131.32 | 531.11  | 207.54 |
| 33    | 77.84   | 46.26  | 109.02 | 144.82 | 106.60 | 162.32 | 301.10 | 634.59 | 143.41 | 536.23  | 224.67 |
| 34    | 66.79   | 47.28  | 82.88  | 150.88 | 93.55  | 137.20 | 265.95 | 672.92 | 132.37 | 477.99  | 200.57 |
| 35    | 74.85   | 56.34  | 98.99  | 130.78 | 94.57  | 121.13 | 293.16 | 614.69 | 151.51 | 529.38  | 242.86 |
| 36    | 71.84   | 51.32  | 114.10 | 141.88 | 101.63 | 129.20 | 249.94 | 627.87 | 125.37 | 474.13  | 205.67 |
| 37    | 62.80   | 21.13  | 97.02  | 116.74 | 90.57  | 134.25 | 272.13 | 620.94 | 147.54 | 520.50  | 180.54 |
| 38    | 55.76   | 50.33  | 100.05 | 130.85 | 106.69 | 149.37 | 225.87 | 590.85 | 119.38 | 479.32  | 234.93 |
| 39    | 64.83   | 35.24  | 96.04  | 88.59  | 91.61  | 151.41 | 282.29 | 625.18 | 127.45 | 461.28  | 197.72 |
| 40    | 75.92   | 46.32  | 65.85  | 111.77 | 93.64  | 142.38 | 285.36 | 569.91 | 118.41 | 501.64  | 176.61 |

|    |       |       |        |        |       |        |        |        |        |        |        |
|----|-------|-------|--------|--------|-------|--------|--------|--------|--------|--------|--------|
| 41 | 59.82 | 22.16 | 94.06  | 129.91 | 76.54 | 186.71 | 283.39 | 593.17 | 137.57 | 475.54 | 201.82 |
| 42 | 67.89 | 55.40 | 89.04  | 124.90 | 86.62 | 158.54 | 264.30 | 653.70 | 136.58 | 476.63 | 199.84 |
| 43 | 37.68 | 40.30 | 104.17 | 121.90 | 85.63 | 142.45 | 246.21 | 588.33 | 126.53 | 435.41 | 181.74 |
| 44 | 70.94 | 33.25 | 109.63 | 116.88 | 84.64 | 135.42 | 277.49 | 587.43 | 108.42 | 437.50 | 225.10 |
| 45 | 64.90 | 43.33 | 122.75 | 104.81 | 93.72 | 155.60 | 229.17 | 604.66 | 120.53 | 496.02 | 211.03 |
| 46 | 77.01 | 39.31 | 109.06 | 100.79 | 83.66 | 136.47 | 260.45 | 553.36 | 124.58 | 464.86 | 207.03 |
| 47 | 69.96 | 48.39 | 102.02 | 126.01 | 72.58 | 134.48 | 254.45 | 572.61 | 108.47 | 435.71 | 177.83 |
| 48 | 88.12 | 27.22 | 84.90  | 120.99 | 77.64 | 117.36 | 278.69 | 590.86 | 124.62 | 455.95 | 160.72 |
| 49 | 40.74 | 52.44 | 120.41 | 119.00 | 88.74 | 125.45 | 279.75 | 567.76 | 99.43  | 431.82 | 195.04 |
| 50 | 77.06 | 34.29 | 102.28 | 92.79  | 76.66 | 148.67 | 239.45 | 534.58 | 118.62 | 421.81 | 188.01 |
| 51 | 57.91 | 38.34 | 104.31 | 114.00 | 77.68 | 138.61 | 242.52 | 581.07 | 136.79 | 459.21 | 214.27 |
| 52 | 67.00 | 31.28 | 87.18  | 107.96 | 71.64 | 129.55 | 263.75 | 617.50 | 92.42  | 491.57 | 183.03 |
| 53 | 59.94 | 43.39 | 98.29  | 102.93 | 68.62 | 142.69 | 213.33 | 613.56 | 101.52 | 434.14 | 178.01 |
| 54 | 67.02 | 55.51 | 85.19  | 101.94 | 74.69 | 106.38 | 239.61 | 589.45 | 107.59 | 417.05 | 164.92 |
| 55 | 55.93 | 37.35 | 98.33  | 107.01 | 68.65 | 112.46 | 233.60 | 591.57 | 108.62 | 388.86 | 168.99 |
| 56 | 77.14 | 39.38 | 98.34  | 77.74  | 80.77 | 111.47 | 229.60 | 553.30 | 105.61 | 359.65 | 158.92 |
| 57 | 53.93 | 23.23 | 100.38 | 76.75  | 72.71 | 142.79 | 230.65 | 551.38 | 77.35  | 427.37 | 176.12 |
| 58 | 64.04 | 26.26 | 85.25  | 106.05 | 62.62 | 117.57 | 230.69 | 584.80 | 102.62 | 368.86 | 177.16 |
| 59 | 51.92 | 38.39 | 125.67 | 89.91  | 81.83 | 103.44 | 216.59 | 484.89 | 94.55  | 428.52 | 152.94 |
| 60 | 54.96 | 25.26 | 94.37  | 91.94  | 72.75 | 141.86 | 188.33 | 606.22 | 86.49  | 373.03 | 181.26 |
| 61 | 63.06 | 42.44 | 81.25  | 98.02  | 67.71 | 111.56 | 222.72 | 511.33 | 100.65 | 384.21 | 154.01 |
| 62 | 60.04 | 42.45 | 79.24  | 96.02  | 60.64 | 127.75 | 198.50 | 553.87 | 88.54  | 356.98 | 200.53 |
| 63 | 79.25 | 24.26 | 105.54 | 83.90  | 80.87 | 135.86 | 218.76 | 509.49 | 100.68 | 376.25 | 189.44 |
| 64 | 50.96 | 35.39 | 99.49  | 85.94  | 63.70 | 131.84 | 201.61 | 500.48 | 110.81 | 362.16 | 174.31 |
| 65 | 56.02 | 10.11 | 103.55 | 83.93  | 59.66 | 101.53 | 193.55 | 516.74 | 93.64  | 360.20 | 146.02 |
| 66 | 38.84 | 27.31 | 93.45  | 77.88  | 59.67 | 116.72 | 179.42 | 525.93 | 65.34  | 341.05 | 180.44 |
| 67 | 48.96 | 30.35 | 91.45  | 70.81  | 53.61 | 109.66 | 216.88 | 549.29 | 92.66  | 360.33 | 176.42 |
| 68 | 56.05 | 24.28 | 76.29  | 90.05  | 92.07 | 74.26  | 216.92 | 519.03 | 76.49  | 380.62 | 143.06 |
| 69 | 69.22 | 13.16 | 104.63 | 97.15  | 80.95 | 98.56  | 200.77 | 502.93 | 93.70  | 391.82 | 161.30 |
| 70 | 68.22 | 40.48 | 82.39  | 85.02  | 56.68 | 95.54  | 186.63 | 498.97 | 112.95 | 370.63 | 188.66 |
| 71 | 57.09 | 35.43 | 106.69 | 78.96  | 77.95 | 87.46  | 179.58 | 513.23 | 101.84 | 373.73 | 161.36 |
| 72 | 43.94 | 24.30 | 86.46  | 71.88  | 46.57 | 94.56  | 188.72 | 463.70 | 101.85 | 353.55 | 149.24 |
| 73 | 45.97 | 45.57 | 81.62  | 75.95  | 50.63 | 86.48  | 212.04 | 514.42 | 88.71  | 344.50 | 158.38 |
| 74 | 57.12 | 28.36 | 103.91 | 77.99  | 75.96 | 84.47  | 200.94 | 500.32 | 113.03 | 380.00 | 146.25 |
| 75 | 45.99 | 39.51 | 84.69  | 90.15  | 82.05 | 92.59  | 136.14 | 452.80 | 88.74  | 330.43 | 147.29 |
| 76 | 44.98 | 34.45 | 78.62  | 55.72  | 80.04 | 112.87 | 195.94 | 519.75 | 86.73  | 345.69 | 159.47 |
| 77 | 77.42 | 18.24 | 103.97 | 92.21  | 53.71 | 102.75 | 178.75 | 483.36 | 96.87  | 339.67 | 158.48 |
| 78 | 50.07 | 36.49 | 88.78  | 60.81  | 62.84 | 72.36  | 213.24 | 481.41 | 101.96 | 373.17 | 182.84 |
| 79 | 47.03 | 19.26 | 74.61  | 52.71  | 83.12 | 107.85 | 198.07 | 456.15 | 81.70  | 298.22 | 175.77 |
| 80 | 71.38 | 31.43 | 96.92  | 79.08  | 49.68 | 93.68  | 155.52 | 479.55 | 82.73  | 303.34 | 143.36 |

Central Lung In-DTPA Counts (CF HS)

| Frame | Patient |       |       |        |       |        |        |        |        |        |        |
|-------|---------|-------|-------|--------|-------|--------|--------|--------|--------|--------|--------|
|       | 1       | 2     | 3     | 4      | 6     | 7      | 8      | 9      | 10     | 11     | 12     |
| 1     | 60.81   | 42.01 | 60.61 | 205.64 | 92.82 | 158.23 | 337.86 | 388.07 | 116.82 | 669.12 | 222.44 |
| 2     | 44.82   | 51.02 | 80.63 | 223.68 | 85.03 | 154.25 | 357.92 | 429.15 | 111.84 | 584.40 | 213.47 |
| 3     | 42.82   | 38.02 | 75.64 | 201.70 | 73.04 | 140.27 | 322.97 | 390.20 | 132.87 | 646.53 | 217.51 |
| 4     | 60.84   | 40.03 | 63.64 | 193.73 | 79.05 | 121.28 | 322.02 | 397.27 | 104.87 | 601.61 | 200.54 |
| 5     | 44.84   | 43.04 | 63.66 | 220.79 | 72.06 | 139.32 | 323.08 | 351.30 | 115.90 | 589.71 | 197.57 |
| 6     | 39.84   | 38.04 | 63.67 | 203.81 | 88.09 | 130.33 | 263.07 | 375.39 | 120.92 | 590.81 | 235.64 |
| 7     | 59.87   | 25.03 | 60.67 | 208.85 | 66.08 | 139.37 | 259.11 | 433.52 | 101.92 | 623.95 | 184.62 |
| 8     | 38.85   | 34.05 | 60.68 | 213.89 | 88.12 | 141.39 | 270.17 | 355.49 | 115.96 | 545.95 | 171.64 |
| 9     | 55.89   | 32.05 | 45.67 | 208.92 | 76.12 | 123.39 | 251.19 | 349.54 | 106.97 | 551.05 | 183.68 |
| 10    | 67.92   | 37.06 | 50.69 | 173.90 | 74.33 | 133.43 | 205.15 | 344.59 | 91.96  | 563.17 | 143.65 |
| 11    | 54.90   | 18.03 | 54.70 | 185.95 | 60.31 | 90.37  | 167.12 | 344.65 | 100.99 | 545.23 | 162.71 |
| 12    | 45.90   | 25.05 | 40.68 | 187.99 | 50.30 | 106.42 | 209.23 | 298.62 | 95.00  | 476.18 | 162.74 |
| 13    | 39.89   | 12.03 | 45.10 | 188.02 | 68.15 | 104.43 | 212.27 | 307.69 | 97.02  | 494.30 | 132.70 |
| 14    | 18.85   | 32.08 | 39.50 | 163.99 | 67.16 | 130.51 | 171.21 | 311.75 | 85.00  | 410.19 | 126.70 |
| 15    | 52.94   | 21.05 | 44.52 | 175.05 | 50.13 | 87.43  | 183.27 | 345.89 | 95.04  | 338.07 | 112.69 |
| 16    | 57.96   | 14.04 | 56.56 | 153.02 | 58.16 | 91.45  | 189.32 | 301.83 | 78.01  | 351.16 | 121.73 |
| 17    | 47.94   | 17.05 | 37.51 | 147.03 | 65.19 | 89.46  | 129.18 | 313.92 | 60.98  | 330.16 | 110.72 |
| 18    | 35.91   | 24.07 | 54.57 | 125.99 | 74.23 | 72.42  | 126.19 | 294.91 | 67.01  | 316.18 | 119.77 |
| 19    | 29.90   | 19.06 | 31.50 | 93.91  | 55.18 | 87.49  | 176.38 | 304.99 | 80.06  | 288.14 | 95.71  |
| 20    | 32.91   | 17.06 | 40.54 | 76.86  | 49.17 | 91.51  | 151.32 | 255.68 | 81.08  | 273.14 | 114.79 |
| 21    | 30.91   | 8.03  | 46.57 | 99.96  | 48.17 | 63.43  | 181.45 | 306.91 | 79.08  | 242.07 | 120.84 |
| 22    | 27.91   | 16.06 | 39.55 | 93.95  | 62.23 | 82.51  | 174.46 | 326.23 | 65.05  | 265.20 | 89.74  |
| 23    | 30.92   | 17.07 | 39.56 | 73.89  | 44.17 | 69.47  | 149.39 | 322.27 | 76.10  | 189.95 | 98.79  |
| 24    | 41.97   | 19.08 | 47.60 | 80.93  | 32.13 | 83.54  | 175.52 | 264.09 | 68.08  | 245.21 | 107.84 |
| 25    | 19.89   | 11.05 | 41.58 | 94.00  | 27.12 | 68.49  | 157.48 | 260.12 | 64.07  | 264.33 | 97.82  |
| 26    | 40.98   | 18.08 | 47.61 | 91.01  | 40.18 | 77.55  | 169.56 | 277.24 | 81.16  | 253.33 | 102.86 |
| 27    | 44.00   | 22.10 | 51.64 | 74.95  | 25.12 | 58.47  | 140.45 | 286.33 | 70.12  | 221.22 | 89.82  |
| 28    | 28.94   | 18.09 | 42.61 | 80.99  | 22.11 | 76.57  | 188.71 | 311.50 | 54.06  | 216.24 | 126.01 |
| 29    | 37.99   | 24.12 | 38.59 | 74.97  | 29.14 | 68.54  | 147.53 | 283.41 | 70.15  | 238.39 | 104.92 |
| 30    | 27.94   | 5.03  | 53.68 | 67.95  | 45.23 | 63.53  | 169.67 | 279.44 | 56.09  | 248.48 | 94.89  |
| 31    | 44.03   | 20.11 | 32.57 | 73.99  | 30.16 | 83.64  | 150.60 | 255.36 | 54.09  | 236.46 | 97.92  |
| 32    | 32.98   | 16.09 | 33.58 | 97.13  | 44.24 | 73.60  | 157.66 | 277.52 | 48.06  | 232.48 | 96.93  |
| 33    | 38.02   | 17.10 | 58.73 | 66.98  | 42.24 | 79.65  | 154.67 | 271.54 | 49.08  | 230.50 | 94.94  |
| 34    | 23.94   | 15.09 | 38.22 | 92.14  | 27.16 | 69.61  | 135.59 | 277.62 | 51.10  | 229.54 | 104.01 |
| 35    | 25.96   | 11.07 | 56.34 | 75.05  | 26.16 | 60.56  | 136.62 | 259.56 | 48.09  | 238.63 | 106.04 |
| 36    | 27.97   | 20.12 | 61.38 | 73.05  | 39.24 | 54.54  | 115.51 | 265.64 | 45.08  | 241.69 | 86.94  |
| 37    | 23.95   | 1.01  | 48.31 | 61.99  | 33.21 | 61.59  | 132.64 | 257.63 | 65.21  | 268.91 | 101.04 |
| 38    | 33.02   | 11.07 | 52.34 | 69.05  | 42.28 | 76.70  | 103.47 | 230.50 | 36.03  | 194.47 | 101.06 |
| 39    | 30.00   | 7.05  | 50.34 | 46.91  | 34.23 | 61.61  | 128.66 | 270.81 | 44.09  | 220.67 | 94.03  |
| 40    | 27.99   | 7.05  | 39.27 | 61.02  | 34.23 | 73.71  | 115.59 | 262.80 | 35.04  | 230.78 | 84.98  |

|    |       |       |       |       |       |       |        |        |       |        |        |
|----|-------|-------|-------|-------|-------|-------|--------|--------|-------|--------|--------|
| 41 | 19.94 | 11.08 | 50.35 | 79.16 | 22.16 | 80.77 | 107.56 | 273.92 | 45.12 | 222.76 | 103.12 |
| 42 | 32.03 | 16.12 | 44.32 | 71.11 | 32.23 | 65.67 | 104.55 | 267.93 | 38.07 | 240.93 | 88.03  |
| 43 | 17.93 | 15.11 | 53.39 | 61.05 | 24.18 | 65.68 | 106.58 | 264.95 | 43.12 | 213.77 | 93.09  |
| 44 | 24.99 | 15.11 | 56.43 | 68.11 | 38.29 | 60.66 | 105.60 | 290.19 | 43.12 | 235.98 | 111.24 |
| 45 | 21.97 | 12.09 | 51.40 | 59.06 | 29.23 | 70.75 | 103.60 | 276.13 | 36.08 | 234.00 | 115.29 |
| 46 | 36.08 | 10.08 | 58.86 | 58.06 | 24.19 | 54.63 | 134.86 | 256.02 | 41.12 | 212.88 | 103.21 |
| 47 | 29.03 | 18.15 | 53.43 | 70.16 | 17.14 | 71.78 | 107.67 | 280.26 | 39.11 | 197.79 | 93.15  |
| 48 | 24.00 | 8.07  | 31.26 | 71.18 | 23.19 | 53.64 | 91.55  | 276.27 | 42.15 | 229.08 | 83.08  |
| 49 | 19.97 | 13.11 | 59.90 | 73.21 | 27.23 | 52.64 | 108.71 | 262.20 | 33.08 | 214.00 | 94.19  |
| 50 | 35.10 | 8.07  | 53.86 | 44.99 | 28.24 | 64.75 | 122.85 | 231.99 | 46.20 | 220.08 | 103.28 |
| 51 | 23.00 | 9.08  | 60.93 | 56.09 | 28.25 | 59.72 | 114.80 | 281.46 | 54.27 | 253.41 | 107.34 |
| 52 | 27.04 | 15.14 | 57.92 | 43.99 | 19.17 | 56.70 | 142.06 | 289.58 | 38.14 | 268.59 | 97.27  |
| 53 | 22.00 | 13.12 | 50.86 | 62.16 | 32.29 | 55.71 | 112.82 | 250.27 | 35.12 | 229.28 | 79.12  |
| 54 | 34.12 | 26.24 | 49.86 | 75.30 | 19.18 | 42.59 | 86.60  | 265.45 | 38.15 | 206.10 | 81.15  |
| 55 | 24.03 | 17.16 | 54.92 | 47.04 | 35.33 | 47.65 | 102.77 | 240.26 | 35.13 | 204.12 | 83.18  |
| 56 | 33.12 | 17.16 | 59.98 | 38.97 | 33.32 | 53.71 | 95.72  | 240.30 | 41.19 | 188.00 | 87.24  |
| 57 | 28.07 | 10.10 | 63.01 | 38.98 | 19.19 | 67.86 | 99.77  | 231.25 | 41.20 | 221.36 | 106.44 |
| 58 | 27.07 | 5.05  | 50.91 | 50.10 | 28.28 | 58.78 | 119.99 | 256.55 | 50.30 | 185.04 | 86.26  |
| 59 | 22.02 | 14.14 | 60.01 | 49.10 | 35.36 | 49.70 | 105.87 | 208.10 | 35.15 | 209.31 | 75.16  |
| 60 | 22.03 | 9.09  | 41.83 | 49.10 | 23.24 | 59.81 | 107.91 | 230.36 | 37.18 | 186.11 | 83.25  |
| 61 | 20.01 | 11.12 | 37.79 | 53.15 | 30.32 | 58.81 | 115.00 | 205.14 | 27.08 | 218.48 | 78.22  |
| 62 | 28.10 | 9.10  | 39.82 | 56.20 | 16.17 | 52.76 | 109.97 | 216.29 | 34.16 | 172.02 | 100.47 |
| 63 | 21.03 | 10.11 | 60.05 | 49.13 | 18.20 | 53.78 | 106.95 | 210.26 | 36.19 | 182.16 | 98.46  |
| 64 | 24.06 | 16.18 | 43.88 | 41.05 | 25.28 | 59.85 | 92.82  | 216.37 | 33.16 | 179.16 | 83.31  |
| 65 | 15.98 | 8.09  | 68.16 | 43.08 | 25.28 | 52.79 | 96.88  | 240.67 | 26.09 | 186.27 | 78.27  |
| 66 | 25.08 | 13.15 | 43.90 | 44.10 | 10.11 | 47.74 | 92.85  | 217.45 | 28.12 | 179.22 | 95.48  |
| 67 | 12.95 | 19.22 | 40.87 | 39.05 | 13.15 | 47.75 | 98.93  | 224.57 | 37.23 | 179.25 | 93.47  |
| 68 | 25.09 | 5.06  | 46.95 | 43.10 | 28.33 | 34.60 | 105.02 | 227.65 | 26.10 | 194.46 | 69.20  |
| 69 | 24.08 | 8.10  | 61.12 | 47.16 | 34.41 | 51.81 | 85.81  | 218.58 | 32.18 | 168.18 | 74.28  |
| 70 | 27.12 | 1.01  | 43.93 | 46.15 | 15.18 | 40.69 | 79.75  | 221.65 | 39.27 | 180.36 | 99.59  |
| 71 | 25.11 | 13.16 | 52.03 | 28.95 | 38.47 | 44.74 | 83.82  | 232.82 | 42.31 | 207.72 | 84.42  |
| 72 | 18.02 | 3.04  | 58.52 | 30.98 | 20.25 | 39.69 | 98.01  | 217.68 | 33.21 | 190.54 | 85.45  |
| 73 | 21.06 | 14.18 | 48.20 | 35.04 | 16.20 | 40.71 | 103.09 | 202.53 | 37.26 | 160.20 | 77.36  |
| 74 | 23.09 | 15.19 | 56.31 | 35.04 | 23.29 | 41.73 | 115.26 | 195.47 | 44.36 | 190.61 | 62.19  |
| 75 | 19.04 | 10.13 | 47.21 | 35.05 | 30.39 | 38.70 | 76.78  | 207.66 | 26.13 | 159.24 | 77.39  |
| 76 | 21.07 | 9.12  | 42.15 | 24.92 | 25.33 | 49.85 | 72.74  | 232.01 | 31.21 | 178.52 | 91.59  |
| 77 | 34.25 | 5.07  | 54.31 | 42.15 | 16.21 | 46.82 | 69.72  | 202.67 | 35.26 | 186.65 | 90.59  |
| 78 | 25.14 | 12.16 | 54.32 | 22.91 | 22.30 | 23.51 | 88.99  | 191.55 | 38.31 | 180.61 | 90.61  |
| 79 | 20.07 | 8.11  | 37.10 | 22.91 | 29.40 | 53.93 | 80.89  | 175.37 | 28.18 | 157.32 | 98.73  |
| 80 | 32.24 | 9.12  | 51.30 | 46.23 | 19.26 | 54.95 | 75.84  | 197.70 | 26.16 | 154.31 | 76.44  |



## Whole Lung Tc-SC Counts (Non-CF)

| Frame | Patient |         |         |         |         |        |         |         |         |
|-------|---------|---------|---------|---------|---------|--------|---------|---------|---------|
|       | 1       | 2       | 3       | 4       | 5       | 6      | 7       | 8       | 9       |
| 1     | 3386.79 | 2854.53 | 1765.19 | 3357.17 | 2184.33 | 844.15 | 3358.78 | 1865.44 | 2156.30 |
| 2     | 3344.63 | 2841.65 | 1751.43 | 3321.50 | 2044.27 | 748.00 | 3076.55 | 1819.69 | 2092.51 |
| 3     | 3276.08 | 2742.97 | 1650.34 | 3273.79 | 2070.57 | 804.48 | 3256.59 | 1834.23 | 1965.87 |
| 4     | 3322.97 | 2747.76 | 1709.79 | 3177.82 | 2054.18 | 799.84 | 3267.22 | 1757.88 | 1986.02 |
| 5     | 3287.89 | 2610.85 | 1725.06 | 3195.55 | 1984.91 | 758.96 | 3154.77 | 1710.26 | 2021.74 |
| 6     | 3135.90 | 2608.56 | 1688.24 | 3235.62 | 2028.83 | 899.20 | 3053.76 | 1840.62 | 2027.15 |
| 7     | 3118.19 | 2449.78 | 1682.70 | 2971.26 | 1940.75 | 722.12 | 3119.39 | 1718.70 | 1968.24 |
| 8     | 3197.51 | 2382.86 | 1683.50 | 2898.72 | 1863.76 | 796.15 | 2942.26 | 1837.44 | 1952.73 |
| 9     | 3128.15 | 2250.02 | 1660.89 | 2880.97 | 1973.16 | 780.20 | 2959.53 | 1618.44 | 1948.27 |
| 10    | 3077.10 | 2295.34 | 1719.52 | 2953.96 | 1906.19 | 786.44 | 3008.19 | 1755.35 | 2007.27 |
| 11    | 3132.15 | 1927.16 | 1599.11 | 2638.29 | 1907.94 | 748.28 | 2827.47 | 1761.17 | 1900.94 |
| 12    | 3029.28 | 1923.51 | 1635.24 | 2709.87 | 1930.24 | 687.83 | 2630.41 | 1695.39 | 2006.20 |
| 13    | 3146.45 | 1956.16 | 1697.69 | 2780.44 | 1869.53 | 752.50 | 2647.62 | 1813.72 | 1884.56 |
| 14    | 3183.58 | 1955.88 | 1637.26 | 2811.36 | 1656.26 | 796.16 | 2655.65 | 1660.62 | 1919.56 |
| 15    | 3030.86 | 1927.21 | 1580.15 | 2708.21 | 1836.03 | 733.71 | 2514.31 | 1645.99 | 1858.93 |
| 16    | 3141.85 | 1838.94 | 1616.46 | 2648.21 | 1698.08 | 747.78 | 2458.72 | 1698.55 | 1841.67 |
| 17    | 3111.71 | 1805.17 | 1701.31 | 2551.07 | 1755.42 | 779.13 | 2460.43 | 1765.38 | 1763.39 |
| 18    | 3000.17 | 1818.81 | 1652.79 | 2611.10 | 1661.26 | 691.54 | 2391.70 | 1620.13 | 1760.75 |
| 19    | 2933.64 | 1803.21 | 1711.33 | 2585.53 | 1638.02 | 803.12 | 2308.46 | 1733.55 | 1730.39 |
| 20    | 2976.74 | 1845.98 | 1636.10 | 2558.54 | 1695.64 | 747.10 | 2364.29 | 1732.07 | 1704.89 |
| 21    | 2833.18 | 1906.69 | 1672.36 | 2585.05 | 1625.06 | 660.48 | 2419.60 | 1770.28 | 1736.88 |
| 22    | 2956.86 | 1833.87 | 1624.46 | 2562.09 | 1780.67 | 762.79 | 2637.12 | 1760.79 | 1746.74 |
| 23    | 2806.63 | 1773.72 | 1725.63 | 2472.28 | 1687.80 | 742.04 | 2527.89 | 1842.81 | 1654.44 |
| 24    | 2811.44 | 1778.16 | 1618.43 | 2527.31 | 1687.95 | 758.03 | 2486.48 | 1692.79 | 1710.73 |
| 25    | 2837.49 | 1721.60 | 1645.93 | 2357.33 | 1712.73 | 771.48 | 2449.38 | 1664.20 | 1668.40 |
| 26    | 2795.20 | 1698.16 | 1534.33 | 2339.94 | 1568.87 | 666.47 | 2418.99 | 1747.37 | 1676.03 |
| 27    | 2961.92 | 1715.44 | 1623.18 | 2266.54 | 1641.90 | 671.41 | 2488.80 | 1609.80 | 1647.37 |
| 28    | 2806.06 | 1559.16 | 1604.04 | 2295.33 | 1638.44 | 672.70 | 2439.13 | 1705.11 | 1683.15 |
| 29    | 2755.62 | 1697.11 | 1599.88 | 2392.60 | 1660.69 | 765.46 | 2319.58 | 1779.20 | 1613.61 |
| 30    | 2814.21 | 1697.46 | 1678.25 | 2164.86 | 1603.03 | 661.74 | 2404.61 | 1691.53 | 1801.06 |
| 31    | 2756.42 | 1612.17 | 1561.49 | 2327.60 | 1523.89 | 682.51 | 2296.44 | 1680.14 | 1560.84 |
| 32    | 2796.55 | 1584.04 | 1583.94 | 2212.15 | 1692.35 | 670.66 | 2415.76 | 1654.78 | 1711.38 |
| 33    | 2787.76 | 1527.15 | 1545.77 | 2146.67 | 1656.59 | 701.49 | 2391.69 | 1659.44 | 1653.99 |
| 34    | 2951.42 | 1528.77 | 1599.55 | 2097.29 | 1625.57 | 684.80 | 2382.25 | 1586.32 | 1593.98 |
| 35    | 2816.66 | 1553.51 | 1529.39 | 2171.06 | 1522.87 | 738.11 | 2356.72 | 1620.04 | 1602.53 |
| 36    | 2767.29 | 1598.61 | 1584.98 | 2074.52 | 1647.59 | 725.24 | 2269.10 | 1687.16 | 1657.79 |
| 37    | 2862.99 | 1529.69 | 1680.39 | 2006.38 | 1630.86 | 664.18 | 2333.62 | 1693.29 | 1514.92 |
| 38    | 2740.41 | 1550.11 | 1587.06 | 2054.16 | 1465.99 | 666.85 | 2200.84 | 1706.10 | 1669.00 |
| 39    | 2763.15 | 1525.94 | 1508.79 | 1922.01 | 1455.29 | 745.68 | 2342.61 | 1644.16 | 1686.40 |
| 40    | 2686.62 | 1567.47 | 1543.09 | 2057.46 | 1524.27 | 656.92 | 2292.68 | 1597.93 | 1581.33 |

|    |         |         |         |         |         |        |         |         |         |
|----|---------|---------|---------|---------|---------|--------|---------|---------|---------|
| 41 | 2792.93 | 1557.94 | 1613.62 | 1912.25 | 1607.89 | 639.75 | 2160.75 | 1654.75 | 1518.03 |
| 42 | 2708.64 | 1567.97 | 1585.53 | 1895.82 | 1470.79 | 706.23 | 2418.11 | 1646.67 | 1637.80 |
| 43 | 2767.18 | 1518.99 | 1586.09 | 1936.54 | 1487.44 | 623.55 | 2219.41 | 1642.20 | 1578.92 |
| 44 | 2595.10 | 1603.92 | 1534.60 | 2004.10 | 1419.14 | 664.28 | 2267.50 | 1622.32 | 1661.22 |
| 45 | 2864.95 | 1528.84 | 1550.40 | 1915.05 | 1456.32 | 633.61 | 2298.71 | 1681.14 | 1470.90 |
| 46 | 2800.57 | 1558.22 | 1515.24 | 1879.45 | 1459.02 | 645.38 | 2295.27 | 1711.60 | 1673.01 |
| 47 | 2525.02 | 1634.66 | 1533.46 | 1970.82 | 1518.75 | 726.19 | 2364.13 | 1624.24 | 1553.00 |
| 48 | 2724.03 | 1573.07 | 1450.83 | 1811.83 | 1514.23 | 676.83 | 2343.97 | 1672.01 | 1612.68 |
| 49 | 2878.87 | 1517.94 | 1436.27 | 1991.26 | 1368.91 | 632.13 | 2238.85 | 1602.04 | 1738.34 |
| 50 | 2794.75 | 1526.85 | 1552.29 | 2032.33 | 1430.18 | 678.08 | 2220.05 | 1583.59 | 1561.32 |
| 51 | 2760.08 | 1538.93 | 1551.96 | 2017.24 | 1426.21 | 671.38 | 2261.48 | 1625.93 | 1583.91 |
| 52 | 2775.08 | 1477.65 | 1563.70 | 1944.29 | 1468.99 | 616.00 | 2142.03 | 1525.15 | 1623.43 |
| 53 | 2785.20 | 1438.76 | 1560.30 | 1917.11 | 1393.65 | 661.89 | 2065.12 | 1444.54 | 1545.47 |
| 54 | 2550.96 | 1516.05 | 1503.83 | 1927.57 | 1405.43 | 666.70 | 2253.54 | 1569.14 | 1560.53 |
| 55 | 2661.74 | 1469.25 | 1504.73 | 1789.53 | 1391.82 | 652.34 | 2165.93 | 1661.26 | 1633.55 |
| 56 | 2688.41 | 1507.34 | 1592.45 | 1843.89 | 1540.02 | 525.18 | 2295.94 | 1567.27 | 1570.81 |
| 57 | 2627.58 | 1531.78 | 1623.53 | 1859.66 | 1418.72 | 629.19 | 2158.44 | 1627.77 | 1624.31 |
| 58 | 2769.71 | 1358.60 | 1512.21 | 1976.61 | 1359.36 | 633.54 | 2151.69 | 1644.00 | 1526.51 |
| 59 | 2677.44 | 1515.97 | 1515.10 | 1781.76 | 1401.14 | 609.26 | 2162.44 | 1543.38 | 1505.88 |
| 60 | 2756.34 | 1359.88 | 1467.39 | 1949.64 | 1317.93 | 661.88 | 2278.83 | 1573.45 | 1547.23 |
| 61 | 2735.82 | 1515.78 | 1494.99 | 1987.40 | 1372.46 | 516.50 | 2077.16 | 1601.19 | 1507.89 |
| 62 | 2732.61 | 1437.91 | 1470.05 | 1828.20 | 1416.09 | 697.61 | 2225.39 | 1622.76 | 1575.18 |
| 63 | 2797.76 | 1462.73 | 1485.67 | 1913.07 | 1425.53 | 636.31 | 2168.19 | 1637.58 | 1575.06 |
| 64 | 2808.97 | 1526.81 | 1478.60 | 1899.38 | 1472.70 | 627.16 | 2070.76 | 1565.24 | 1478.71 |
| 65 | 2803.01 | 1469.47 | 1510.96 | 1919.07 | 1354.15 | 653.02 | 2153.06 | 1563.23 | 1471.80 |
| 66 | 2635.06 | 1487.89 | 1410.31 | 1801.87 | 1314.90 | 562.76 | 2217.23 | 1548.55 | 1661.87 |
| 67 | 2595.34 | 1413.92 | 1357.72 | 1867.56 | 1366.79 | 679.60 | 2207.35 | 1604.10 | 1466.07 |
| 68 | 2851.48 | 1370.62 | 1355.24 | 1850.89 | 1438.95 | 631.04 | 2119.97 | 1573.27 | 1552.18 |
| 69 | 2783.61 | 1376.16 | 1386.14 | 1834.49 | 1348.14 | 671.00 | 2209.36 | 1594.93 | 1435.02 |
| 70 | 2776.28 | 1469.14 | 1388.58 | 1784.20 | 1383.42 | 563.31 | 2114.01 | 1486.42 | 1520.36 |
| 71 | 2438.92 | 1379.54 | 1492.29 | 1739.67 | 1331.38 | 570.37 | 2193.72 | 1494.45 | 1485.05 |
| 72 | 2699.10 | 1368.57 | 1338.47 | 1792.90 | 1452.99 | 557.78 | 2127.55 | 1592.22 | 1505.98 |
| 73 | 2691.30 | 1375.44 | 1482.77 | 1795.89 | 1360.24 | 594.74 | 2077.69 | 1527.04 | 1471.96 |
| 74 | 2672.02 | 1412.98 | 1441.83 | 1701.04 | 1295.01 | 553.26 | 2108.42 | 1590.21 | 1513.60 |
| 75 | 2653.85 | 1448.67 | 1419.03 | 1858.18 | 1445.10 | 643.61 | 2180.81 | 1535.20 | 1467.19 |
| 76 | 2673.80 | 1470.46 | 1366.54 | 1784.39 | 1367.00 | 685.87 | 2158.95 | 1514.89 | 1546.51 |
| 77 | 2436.57 | 1415.11 | 1403.27 | 1903.79 | 1365.10 | 618.75 | 2191.28 | 1581.10 | 1505.44 |
| 78 | 2747.76 | 1399.36 | 1449.72 | 1860.14 | 1321.42 | 594.26 | 2041.68 | 1522.32 | 1463.14 |
| 79 | 2625.05 | 1461.40 | 1452.61 | 1790.47 | 1379.06 | 598.93 | 2154.90 | 1397.08 | 1504.14 |
| 80 | 2745.03 | 1466.51 | 1387.29 | 1683.82 | 1453.48 | 618.42 | 2138.47 | 1420.43 | 1505.18 |

Central Lung Tc-SC Counts (Non-CF)

| Frame | Patient |         |        |         |        |        |         |        |         |
|-------|---------|---------|--------|---------|--------|--------|---------|--------|---------|
|       | 1       | 2       | 3      | 4       | 5      | 6      | 7       | 8      | 9       |
| 1     | 1587.27 | 1414.86 | 780.71 | 1246.66 | 993.30 | 328.25 | 1646.49 | 807.82 | 974.32  |
| 2     | 1628.78 | 1470.37 | 780.68 | 1235.76 | 872.47 | 284.31 | 1453.13 | 829.27 | 1018.27 |
| 3     | 1632.80 | 1405.84 | 770.73 | 1193.25 | 906.93 | 321.02 | 1421.81 | 753.75 | 895.77  |
| 4     | 1500.17 | 1422.74 | 716.94 | 1131.97 | 863.50 | 347.35 | 1426.51 | 821.68 | 913.38  |
| 5     | 1526.23 | 1375.23 | 765.20 | 1159.21 | 912.42 | 293.84 | 1427.30 | 751.33 | 1004.86 |
| 6     | 1489.43 | 1260.04 | 768.43 | 1122.06 | 869.89 | 378.38 | 1399.08 | 840.53 | 972.96  |
| 7     | 1463.52 | 1176.45 | 755.61 | 1053.88 | 838.37 | 296.87 | 1407.99 | 756.87 | 919.39  |
| 8     | 1482.25 | 1075.17 | 783.07 | 1031.10 | 813.53 | 323.05 | 1348.60 | 806.87 | 900.66  |
| 9     | 1524.66 | 1031.52 | 790.23 | 957.91  | 832.79 | 303.32 | 1402.27 | 745.04 | 890.09  |
| 10    | 1521.89 | 993.66  | 740.77 | 1041.55 | 855.53 | 306.91 | 1379.43 | 771.23 | 851.37  |
| 11    | 1445.29 | 859.84  | 731.14 | 965.54  | 800.20 | 318.29 | 1271.61 | 759.31 | 846.61  |
| 12    | 1336.83 | 889.61  | 718.13 | 953.60  | 775.93 | 277.70 | 1141.85 | 764.36 | 875.01  |
| 13    | 1475.43 | 889.34  | 724.94 | 1025.55 | 734.85 | 308.95 | 1149.57 | 781.02 | 839.48  |
| 14    | 1430.29 | 839.99  | 689.09 | 1064.67 | 698.37 | 267.47 | 1064.61 | 759.12 | 817.68  |
| 15    | 1389.85 | 839.38  | 691.25 | 912.34  | 774.67 | 290.17 | 1038.24 | 697.34 | 855.04  |
| 16    | 1519.66 | 749.04  | 735.75 | 991.73  | 740.42 | 284.95 | 972.61  | 760.38 | 834.49  |
| 17    | 1468.17 | 788.69  | 736.13 | 921.67  | 723.51 | 286.75 | 1047.57 | 809.89 | 767.14  |
| 18    | 1332.45 | 728.45  | 707.11 | 961.19  | 725.16 | 267.49 | 984.50  | 750.73 | 757.91  |
| 19    | 1284.65 | 778.50  | 719.41 | 951.54  | 686.65 | 281.17 | 948.97  | 770.97 | 743.35  |
| 20    | 1390.65 | 709.57  | 703.27 | 943.24  | 689.50 | 294.68 | 968.05  | 772.04 | 711.57  |
| 21    | 1275.91 | 762.98  | 710.76 | 1027.74 | 693.21 | 234.72 | 993.29  | 753.78 | 703.64  |
| 22    | 1371.18 | 793.45  | 708.64 | 1060.54 | 799.48 | 257.80 | 1083.71 | 843.79 | 740.14  |
| 23    | 1292.65 | 709.52  | 786.15 | 1004.22 | 724.17 | 294.79 | 950.26  | 851.09 | 745.88  |
| 24    | 1250.07 | 647.05  | 766.49 | 1016.80 | 781.61 | 285.89 | 921.71  | 766.41 | 734.47  |
| 25    | 1245.51 | 652.72  | 773.43 | 901.81  | 768.59 | 320.69 | 886.85  | 750.31 | 725.52  |
| 26    | 1297.57 | 695.92  | 650.52 | 910.72  | 738.13 | 278.43 | 909.44  | 770.35 | 709.31  |
| 27    | 1358.52 | 622.72  | 761.38 | 930.60  | 689.50 | 233.68 | 905.73  | 766.18 | 657.01  |
| 28    | 1356.43 | 615.33  | 697.01 | 900.26  | 701.10 | 280.00 | 933.01  | 767.48 | 666.07  |
| 29    | 1294.68 | 622.17  | 696.54 | 902.77  | 729.78 | 280.73 | 830.93  | 794.09 | 608.75  |
| 30    | 1361.08 | 643.21  | 775.02 | 926.70  | 676.97 | 228.31 | 856.61  | 748.22 | 736.05  |
| 31    | 1337.20 | 608.72  | 714.49 | 952.56  | 714.73 | 264.63 | 828.45  | 781.09 | 661.14  |
| 32    | 1349.56 | 601.94  | 670.04 | 826.15  | 751.26 | 278.88 | 838.63  | 786.54 | 690.94  |
| 33    | 1318.02 | 547.28  | 643.35 | 832.22  | 722.79 | 234.76 | 922.04  | 757.54 | 701.34  |
| 34    | 1432.60 | 587.45  | 716.94 | 781.61  | 670.30 | 253.50 | 858.96  | 768.76 | 670.37  |
| 35    | 1306.56 | 581.04  | 680.05 | 849.83  | 610.36 | 285.08 | 852.44  | 758.19 | 696.39  |
| 36    | 1331.97 | 574.53  | 686.80 | 878.34  | 705.29 | 259.59 | 793.41  | 792.68 | 651.66  |
| 37    | 1358.07 | 506.59  | 756.72 | 829.11  | 668.99 | 231.75 | 920.34  | 777.54 | 562.13  |
| 38    | 1325.31 | 571.48  | 733.67 | 768.08  | 585.12 | 244.50 | 782.43  | 822.93 | 664.03  |
| 39    | 1298.43 | 529.76  | 642.40 | 751.13  | 571.89 | 288.50 | 841.23  | 761.58 | 708.16  |
| 40    | 1139.81 | 551.80  | 650.86 | 817.36  | 592.76 | 234.17 | 872.03  | 727.70 | 677.46  |

|    |         |        |        |        |        |        |        |        |        |
|----|---------|--------|--------|--------|--------|--------|--------|--------|--------|
| 41 | 1363.52 | 555.54 | 696.17 | 772.83 | 688.18 | 246.75 | 866.84 | 752.80 | 627.96 |
| 42 | 1254.75 | 567.12 | 697.41 | 750.06 | 627.54 | 260.66 | 873.79 | 745.53 | 703.85 |
| 43 | 1315.72 | 521.80 | 670.50 | 724.44 | 620.90 | 225.94 | 831.12 | 778.01 | 681.59 |
| 44 | 1260.35 | 553.25 | 692.19 | 748.67 | 605.53 | 234.64 | 903.66 | 708.42 | 694.26 |
| 45 | 1304.31 | 552.37 | 702.47 | 791.76 | 567.65 | 239.84 | 829.62 | 840.52 | 621.28 |
| 46 | 1306.48 | 549.11 | 705.43 | 717.45 | 621.40 | 237.35 | 874.45 | 758.24 | 706.59 |
| 47 | 1201.28 | 610.33 | 636.33 | 695.19 | 605.12 | 242.71 | 902.77 | 736.32 | 677.22 |
| 48 | 1273.69 | 565.37 | 669.09 | 715.61 | 691.32 | 223.44 | 912.18 | 798.79 | 660.45 |
| 49 | 1356.50 | 548.97 | 582.78 | 779.54 | 561.08 | 235.09 | 852.79 | 735.37 | 718.94 |
| 50 | 1322.87 | 489.22 | 691.29 | 750.62 | 606.93 | 235.50 | 822.47 | 761.47 | 665.14 |
| 51 | 1243.00 | 527.88 | 665.62 | 735.28 | 586.09 | 252.24 | 774.41 | 754.64 | 667.52 |
| 52 | 1270.41 | 535.52 | 697.67 | 765.16 | 606.48 | 174.96 | 722.66 | 652.34 | 684.68 |
| 53 | 1262.60 | 496.13 | 665.81 | 734.00 | 533.09 | 199.56 | 734.33 | 728.71 | 667.66 |
| 54 | 1232.79 | 510.67 | 640.27 | 760.73 | 586.43 | 250.90 | 824.97 | 707.73 | 621.22 |
| 55 | 1209.31 | 509.47 | 673.33 | 666.53 | 544.13 | 214.56 | 824.49 | 796.76 | 697.04 |
| 56 | 1247.94 | 480.48 | 689.92 | 679.19 | 625.72 | 182.41 | 814.33 | 729.81 | 639.23 |
| 57 | 1157.12 | 481.31 | 735.22 | 709.68 | 575.26 | 233.68 | 759.71 | 774.74 | 687.49 |
| 58 | 1325.59 | 448.14 | 672.40 | 668.29 | 551.82 | 224.94 | 814.80 | 797.75 | 627.69 |
| 59 | 1313.40 | 519.77 | 665.61 | 676.24 | 574.64 | 199.62 | 764.03 | 763.11 | 620.76 |
| 60 | 1281.81 | 450.19 | 680.97 | 723.61 | 499.85 | 246.48 | 906.68 | 739.70 | 666.82 |
| 61 | 1256.65 | 489.96 | 679.98 | 708.23 | 537.18 | 190.12 | 786.51 | 734.46 | 674.79 |
| 62 | 1256.42 | 459.41 | 598.01 | 679.55 | 599.88 | 240.43 | 829.81 | 743.37 | 676.71 |
| 63 | 1262.70 | 468.48 | 643.31 | 733.78 | 578.76 | 210.38 | 761.96 | 710.16 | 637.98 |
| 64 | 1326.31 | 451.05 | 655.25 | 701.84 | 577.70 | 219.33 | 770.92 | 773.59 | 689.18 |
| 65 | 1272.50 | 496.32 | 653.75 | 671.19 | 568.82 | 189.76 | 777.58 | 736.27 | 666.77 |
| 66 | 1172.24 | 448.19 | 617.26 | 716.63 | 558.52 | 203.99 | 802.85 | 784.99 | 734.17 |
| 67 | 1188.97 | 434.36 | 630.24 | 633.93 | 579.11 | 207.75 | 779.00 | 750.26 | 607.94 |
| 68 | 1288.25 | 446.54 | 597.83 | 677.78 | 565.46 | 178.62 | 714.23 | 757.30 | 694.43 |
| 69 | 1273.31 | 457.96 | 617.44 | 726.41 | 609.91 | 230.27 | 771.25 | 744.21 | 666.94 |
| 70 | 1286.08 | 473.15 | 575.68 | 732.97 | 610.53 | 158.82 | 704.07 | 714.26 | 668.47 |
| 71 | 1148.15 | 493.19 | 682.51 | 703.44 | 516.32 | 181.90 | 793.29 | 691.88 | 684.43 |
| 72 | 1196.10 | 435.94 | 587.41 | 688.77 | 614.61 | 195.47 | 714.71 | 760.61 | 564.34 |
| 73 | 1239.90 | 432.98 | 656.63 | 682.84 | 617.10 | 191.29 | 743.58 | 697.63 | 615.67 |
| 74 | 1310.70 | 456.99 | 593.46 | 658.35 | 534.27 | 145.62 | 759.93 | 755.42 | 659.31 |
| 75 | 1235.72 | 467.47 | 617.48 | 693.54 | 650.37 | 214.51 | 764.00 | 750.19 | 652.54 |
| 76 | 1282.88 | 510.00 | 547.72 | 723.83 | 571.87 | 228.75 | 723.27 | 714.67 | 632.84 |
| 77 | 1168.20 | 479.23 | 578.59 | 768.55 | 573.01 | 216.79 | 799.67 | 702.55 | 606.24 |
| 78 | 1193.05 | 443.00 | 643.76 | 738.21 | 545.99 | 175.06 | 685.88 | 768.95 | 584.74 |
| 79 | 1157.90 | 487.44 | 652.44 | 713.38 | 506.47 | 211.80 | 725.48 | 663.21 | 642.25 |
| 80 | 1230.62 | 490.86 | 601.85 | 601.85 | 622.73 | 198.78 | 713.84 | 713.07 | 614.60 |

## Whole Lung In-DTPA Counts (Non-CF)

| Frame | Patient |        |        |        |        |        |        |        |        |
|-------|---------|--------|--------|--------|--------|--------|--------|--------|--------|
|       | 1       | 2      | 3      | 4      | 5      | 6      | 7      | 8      | 9      |
| 1     | 830.74  | 506.49 | 373.86 | 854.15 | 382.47 | 154.03 | 680.72 | 381.87 | 411.27 |
| 2     | 755.86  | 464.56 | 382.93 | 859.30 | 383.53 | 142.05 | 733.85 | 369.93 | 420.34 |
| 3     | 778.20  | 431.62 | 380.00 | 779.40 | 358.58 | 145.07 | 656.94 | 385.00 | 415.41 |
| 4     | 728.30  | 440.70 | 343.04 | 772.53 | 353.64 | 160.11 | 649.05 | 378.06 | 410.48 |
| 5     | 751.45  | 403.75 | 371.12 | 783.67 | 361.71 | 151.13 | 705.21 | 382.13 | 418.56 |
| 6     | 705.53  | 381.79 | 352.16 | 787.81 | 425.84 | 123.13 | 642.26 | 389.20 | 395.61 |
| 7     | 762.72  | 382.86 | 406.29 | 764.92 | 307.77 | 180.22 | 673.41 | 344.21 | 460.75 |
| 8     | 743.82  | 366.90 | 369.31 | 778.07 | 358.89 | 130.18 | 682.54 | 378.32 | 376.72 |
| 9     | 718.91  | 355.95 | 395.41 | 799.24 | 362.96 | 167.26 | 633.58 | 330.31 | 403.82 |
| 10    | 691.99  | 364.03 | 376.45 | 734.26 | 373.04 | 143.25 | 603.64 | 352.41 | 385.86 |
| 11    | 714.15  | 329.02 | 360.48 | 659.25 | 348.06 | 153.29 | 599.73 | 353.47 | 364.89 |
| 12    | 639.12  | 309.04 | 368.56 | 677.40 | 323.07 | 139.29 | 587.81 | 312.44 | 360.94 |
| 13    | 692.35  | 311.09 | 354.59 | 637.42 | 296.06 | 132.30 | 537.80 | 345.57 | 384.06 |
| 14    | 704.49  | 311.15 | 367.68 | 727.75 | 270.05 | 135.33 | 552.93 | 305.53 | 378.11 |
| 15    | 698.60  | 299.17 | 314.61 | 617.59 | 327.24 | 135.35 | 528.96 | 330.65 | 390.20 |
| 16    | 668.64  | 303.23 | 348.76 | 632.74 | 311.25 | 125.34 | 539.08 | 347.76 | 351.16 |
| 17    | 647.69  | 265.17 | 344.81 | 613.79 | 308.30 | 160.47 | 535.16 | 309.70 | 352.23 |
| 18    | 661.84  | 278.26 | 358.91 | 638.97 | 337.44 | 140.43 | 460.02 | 295.71 | 362.32 |
| 19    | 659.95  | 218.11 | 357.97 | 614.00 | 308.41 | 140.46 | 507.25 | 355.96 | 324.26 |
| 20    | 645.01  | 283.37 | 337.96 | 611.10 | 298.42 | 144.50 | 478.24 | 314.88 | 309.26 |
| 21    | 608.99  | 256.32 | 312.93 | 607.19 | 326.58 | 153.55 | 501.41 | 335.01 | 335.41 |
| 22    | 630.98  | 281.46 | 333.06 | 623.35 | 300.53 | 110.42 | 544.66 | 365.18 | 285.28 |
| 23    | 607.00  | 255.41 | 340.14 | 555.19 | 277.50 | 120.48 | 491.54 | 273.88 | 356.61 |
| 24    | 596.66  | 257.46 | 341.20 | 560.31 | 303.65 | 140.58 | 510.70 | 313.09 | 303.45 |
| 25    | 572.46  | 269.56 | 321.18 | 583.50 | 294.66 | 127.55 | 522.84 | 334.23 | 307.52 |
| 26    | 585.61  | 226.41 | 361.41 | 551.46 | 335.90 | 123.55 | 420.48 | 310.18 | 299.54 |
| 27    | 555.57  | 234.49 | 345.40 | 563.61 | 298.78 | 141.66 | 475.80 | 333.34 | 333.75 |
| 28    | 523.51  | 263.67 | 359.53 | 585.81 | 318.93 | 123.59 | 422.63 | 295.22 | 270.50 |
| 29    | 599.98  | 219.49 | 325.42 | 553.75 | 309.94 | 104.52 | 491.04 | 309.34 | 301.70 |
| 30    | 546.81  | 250.69 | 311.40 | 557.87 | 290.90 | 132.68 | 463.99 | 294.31 | 312.81 |
| 31    | 517.75  | 217.56 | 331.56 | 525.79 | 284.91 | 143.76 | 436.92 | 295.37 | 299.79 |
| 32    | 582.19  | 212.57 | 312.51 | 536.95 | 277.92 | 121.67 | 438.00 | 338.66 | 313.92 |
| 33    | 553.13  | 210.59 | 332.68 | 518.94 | 266.91 | 135.77 | 461.21 | 324.64 | 344.15 |
| 34    | 565.29  | 213.65 | 330.73 | 518.02 | 308.20 | 112.66 | 419.04 | 339.78 | 320.07 |
| 35    | 495.98  | 209.66 | 328.77 | 484.91 | 295.17 | 128.77 | 443.26 | 302.62 | 264.79 |
| 36    | 516.18  | 222.77 | 323.80 | 458.83 | 285.16 | 133.83 | 426.23 | 288.58 | 279.93 |
| 37    | 553.71  | 212.75 | 316.81 | 486.08 | 280.18 | 134.86 | 398.12 | 291.65 | 318.22 |
| 38    | 565.88  | 194.67 | 295.73 | 477.11 | 306.40 | 126.83 | 398.19 | 290.69 | 292.10 |
| 39    | 559.94  | 200.74 | 316.92 | 477.19 | 268.19 | 110.74 | 443.56 | 274.64 | 261.95 |
| 40    | 526.81  | 196.75 | 287.77 | 457.13 | 281.33 | 116.80 | 415.45 | 327.04 | 278.11 |

|    |        |        |        |        |        |        |        |        |        |
|----|--------|--------|--------|--------|--------|--------|--------|--------|--------|
| 41 | 492.66 | 181.68 | 276.74 | 428.01 | 254.19 | 121.86 | 398.40 | 280.77 | 277.15 |
| 42 | 538.07 | 156.53 | 301.97 | 492.54 | 254.23 | 137.99 | 339.04 | 310.03 | 242.95 |
| 43 | 555.29 | 175.69 | 305.05 | 423.12 | 237.15 | 105.78 | 408.61 | 320.16 | 279.26 |
| 44 | 511.05 | 180.76 | 332.30 | 411.10 | 255.32 | 144.09 | 381.47 | 280.92 | 260.16 |
| 45 | 531.29 | 158.62 | 307.17 | 421.25 | 289.63 | 116.90 | 393.63 | 279.96 | 281.37 |
| 46 | 517.27 | 166.71 | 292.10 | 476.76 | 273.55 | 122.97 | 386.65 | 254.81 | 267.31 |
| 47 | 534.50 | 176.82 | 266.95 | 426.43 | 264.53 | 107.87 | 368.57 | 281.06 | 251.22 |
| 48 | 474.10 | 152.65 | 319.42 | 458.77 | 279.70 | 106.88 | 361.57 | 252.88 | 269.41 |
| 49 | 522.58 | 143.60 | 299.31 | 412.46 | 267.65 | 116.98 | 392.90 | 264.01 | 244.25 |
| 50 | 519.65 | 164.81 | 293.31 | 454.89 | 239.45 | 93.80  | 381.87 | 253.97 | 247.32 |
| 51 | 484.43 | 158.79 | 293.36 | 421.68 | 266.73 | 104.92 | 384.96 | 266.12 | 267.54 |
| 52 | 453.23 | 148.72 | 265.16 | 422.76 | 239.53 | 116.03 | 365.86 | 271.21 | 267.58 |
| 53 | 529.00 | 155.81 | 296.49 | 411.73 | 268.84 | 116.05 | 337.66 | 293.46 | 278.73 |
| 54 | 482.66 | 159.88 | 272.32 | 464.29 | 211.35 | 102.95 | 334.69 | 296.54 | 252.53 |
| 55 | 457.51 | 158.90 | 312.74 | 437.11 | 240.66 | 95.90  | 352.92 | 263.28 | 244.50 |
| 56 | 467.68 | 189.21 | 269.38 | 430.12 | 241.72 | 110.05 | 373.18 | 290.58 | 229.40 |
| 57 | 512.19 | 145.82 | 265.39 | 413.03 | 228.63 | 95.94  | 331.84 | 281.55 | 239.54 |
| 58 | 466.83 | 117.57 | 307.85 | 418.15 | 248.87 | 102.01 | 328.86 | 291.69 | 250.69 |
| 59 | 467.92 | 149.91 | 303.87 | 388.92 | 203.45 | 99.00  | 369.33 | 260.43 | 240.63 |
| 60 | 436.68 | 159.03 | 290.78 | 418.29 | 216.62 | 131.35 | 318.87 | 269.57 | 242.69 |
| 61 | 452.92 | 131.77 | 265.57 | 391.08 | 206.55 | 114.19 | 363.39 | 266.58 | 239.70 |
| 62 | 443.91 | 140.89 | 272.69 | 392.16 | 245.00 | 106.13 | 339.20 | 248.43 | 265.01 |
| 63 | 470.27 | 127.78 | 270.72 | 391.21 | 246.05 | 118.27 | 331.17 | 242.41 | 236.75 |
| 64 | 481.47 | 173.30 | 260.65 | 412.51 | 255.19 | 119.31 | 339.31 | 253.57 | 253.98 |
| 65 | 400.65 | 137.93 | 278.90 | 412.58 | 223.89 | 103.15 | 346.45 | 261.71 | 253.01 |
| 66 | 429.04 | 127.84 | 293.11 | 438.95 | 244.15 | 90.02  | 320.21 | 266.81 | 240.92 |
| 67 | 460.47 | 142.03 | 259.77 | 353.04 | 214.86 | 94.08  | 336.45 | 235.50 | 270.30 |
| 68 | 455.49 | 140.03 | 263.87 | 379.41 | 233.11 | 106.23 | 344.60 | 269.94 | 220.77 |
| 69 | 456.58 | 127.91 | 294.27 | 377.45 | 224.04 | 63.75  | 336.57 | 222.42 | 232.95 |
| 70 | 434.40 | 131.98 | 270.03 | 419.01 | 241.29 | 91.09  | 320.43 | 241.69 | 235.01 |
| 71 | 450.67 | 125.93 | 273.11 | 428.19 | 254.49 | 90.09  | 309.35 | 225.54 | 209.74 |
| 72 | 462.89 | 133.04 | 234.69 | 340.18 | 255.54 | 91.12  | 336.74 | 224.56 | 213.83 |
| 73 | 420.44 | 133.06 | 267.13 | 354.42 | 212.04 | 108.35 | 305.41 | 266.12 | 186.53 |
| 74 | 435.71 | 96.62  | 273.25 | 359.54 | 247.53 | 105.33 | 274.06 | 240.84 | 207.83 |
| 75 | 449.96 | 139.18 | 274.31 | 379.87 | 198.95 | 105.35 | 295.38 | 234.81 | 210.90 |
| 76 | 400.40 | 136.17 | 281.45 | 349.54 | 218.23 | 94.22  | 315.70 | 236.87 | 244.37 |
| 77 | 410.60 | 86.54  | 267.32 | 361.76 | 207.12 | 93.23  | 311.70 | 209.56 | 208.95 |
| 78 | 422.83 | 138.24 | 246.08 | 362.83 | 228.44 | 85.13  | 299.59 | 245.06 | 237.36 |
| 79 | 415.81 | 129.14 | 261.33 | 360.87 | 243.69 | 89.20  | 269.23 | 221.79 | 190.77 |
| 80 | 441.23 | 114.97 | 232.98 | 369.04 | 187.97 | 83.14  | 285.50 | 242.11 | 200.94 |

Central Lung In-DTPA Counts (Non-CF)

| Frame | Patient |        |        |        |        |       |        |        |        |
|-------|---------|--------|--------|--------|--------|-------|--------|--------|--------|
|       | 1       | 2      | 3      | 4      | 5      | 6     | 7      | 8      | 9      |
| 1     | 392.67  | 258.64 | 164.63 | 326.06 | 171.43 | 50.01 | 347.86 | 155.23 | 188.83 |
| 2     | 371.73  | 219.68 | 166.66 | 333.11 | 173.46 | 57.02 | 369.93 | 183.26 | 192.87 |
| 3     | 405.81  | 231.72 | 176.69 | 321.17 | 176.49 | 52.03 | 317.96 | 171.29 | 197.90 |
| 4     | 348.84  | 228.76 | 155.71 | 292.20 | 148.50 | 58.04 | 307.01 | 170.32 | 190.93 |
| 5     | 340.89  | 202.77 | 161.74 | 282.24 | 172.55 | 58.05 | 327.08 | 172.35 | 188.96 |
| 6     | 328.94  | 188.79 | 159.76 | 303.31 | 181.59 | 57.06 | 294.10 | 184.39 | 161.97 |
| 7     | 364.04  | 184.82 | 168.80 | 288.35 | 125.55 | 73.09 | 325.19 | 162.40 | 208.05 |
| 8     | 353.09  | 176.84 | 185.86 | 289.40 | 160.62 | 57.08 | 367.30 | 156.41 | 185.05 |
| 9     | 336.12  | 189.89 | 168.86 | 279.43 | 165.66 | 78.12 | 306.27 | 160.45 | 179.08 |
| 10    | 338.18  | 190.93 | 172.90 | 279.48 | 170.69 | 49.08 | 309.33 | 149.46 | 178.11 |
| 11    | 345.25  | 167.92 | 179.94 | 259.49 | 145.68 | 58.11 | 271.31 | 166.51 | 172.13 |
| 12    | 286.19  | 132.87 | 166.94 | 245.51 | 146.70 | 57.12 | 267.35 | 140.49 | 156.12 |
| 13    | 316.31  | 161.96 | 170.98 | 235.53 | 117.66 | 37.08 | 273.41 | 158.55 | 205.26 |
| 14    | 333.40  | 159.98 | 161.99 | 278.67 | 113.67 | 48.12 | 265.44 | 124.50 | 158.18 |
| 15    | 316.41  | 148.98 | 144.97 | 257.66 | 141.77 | 61.16 | 232.40 | 133.54 | 181.27 |
| 16    | 300.43  | 168.06 | 161.04 | 250.69 | 136.78 | 52.14 | 281.57 | 151.62 | 160.24 |
| 17    | 293.46  | 137.00 | 162.07 | 211.62 | 143.82 | 66.19 | 252.54 | 142.62 | 172.30 |
| 18    | 293.51  | 137.02 | 146.05 | 270.84 | 145.85 | 46.14 | 208.44 | 127.59 | 169.32 |
| 19    | 291.55  | 107.95 | 163.13 | 233.76 | 124.81 | 54.18 | 235.57 | 156.71 | 152.30 |
| 20    | 291.60  | 141.08 | 155.13 | 221.76 | 137.87 | 43.15 | 242.63 | 118.61 | 128.24 |
| 21    | 273.59  | 116.02 | 154.16 | 245.89 | 138.90 | 61.22 | 227.62 | 147.73 | 160.38 |
| 22    | 292.91  | 130.09 | 157.19 | 276.04 | 140.93 | 50.19 | 230.67 | 181.89 | 105.20 |
| 23    | 268.86  | 121.08 | 158.22 | 220.87 | 136.94 | 57.23 | 218.66 | 130.72 | 171.48 |
| 24    | 300.04  | 121.10 | 151.22 | 239.99 | 154.03 | 55.23 | 225.73 | 141.78 | 140.38 |
| 25    | 266.54  | 118.11 | 162.30 | 237.02 | 135.98 | 45.19 | 231.79 | 160.89 | 155.47 |
| 26    | 285.87  | 112.10 | 185.43 | 231.03 | 150.07 | 55.25 | 170.56 | 124.76 | 147.46 |
| 27    | 273.87  | 120.16 | 179.43 | 253.17 | 144.07 | 67.31 | 216.80 | 150.90 | 150.50 |
| 28    | 266.88  | 137.26 | 172.43 | 242.16 | 144.09 | 56.27 | 201.77 | 146.91 | 132.44 |
| 29    | 277.98  | 118.19 | 163.41 | 230.14 | 133.06 | 42.21 | 195.77 | 141.91 | 161.60 |
| 30    | 286.07  | 121.22 | 162.44 | 252.30 | 133.08 | 54.28 | 203.85 | 148.97 | 154.60 |
| 31    | 248.92  | 80.03  | 173.52 | 222.18 | 137.13 | 60.32 | 171.71 | 137.93 | 134.51 |
| 32    | 296.23  | 87.08  | 130.31 | 220.21 | 153.24 | 51.28 | 176.77 | 165.11 | 138.56 |
| 33    | 256.05  | 103.18 | 154.47 | 247.40 | 119.07 | 41.23 | 182.83 | 138.99 | 132.55 |
| 34    | 283.25  | 96.16  | 147.46 | 221.29 | 138.21 | 55.32 | 163.75 | 166.17 | 142.63 |
| 35    | 246.08  | 83.10  | 156.54 | 218.31 | 141.25 | 46.28 | 174.85 | 164.18 | 119.52 |
| 36    | 261.21  | 94.18  | 144.49 | 209.29 | 136.24 | 54.34 | 181.92 | 139.06 | 142.68 |
| 37    | 273.53  | 104.26 | 142.50 | 229.45 | 142.30 | 49.31 | 170.88 | 128.01 | 170.88 |
| 38    | 277.61  | 78.11  | 157.63 | 191.25 | 156.42 | 64.42 | 161.85 | 131.05 | 134.68 |
| 39    | 241.41  | 90.20  | 138.53 | 218.46 | 132.28 | 40.27 | 183.02 | 126.04 | 118.59 |
| 40    | 247.50  | 93.24  | 125.46 | 213.46 | 120.22 | 37.26 | 193.12 | 139.15 | 124.65 |

|    |        |       |        |        |        |       |        |        |        |
|----|--------|-------|--------|--------|--------|-------|--------|--------|--------|
| 41 | 225.38 | 91.24 | 136.56 | 195.37 | 131.32 | 47.33 | 167.98 | 132.13 | 126.69 |
| 42 | 250.60 | 75.14 | 131.55 | 211.52 | 120.27 | 47.34 | 151.89 | 155.32 | 108.58 |
| 43 | 256.69 | 79.18 | 152.72 | 176.30 | 129.35 | 45.33 | 152.93 | 162.40 | 127.74 |
| 44 | 226.51 | 80.20 | 168.87 | 165.25 | 118.29 | 58.44 | 154.97 | 124.14 | 143.88 |
| 45 | 239.04 | 73.16 | 145.72 | 203.57 | 145.52 | 48.37 | 161.04 | 150.36 | 132.82 |
| 46 | 257.23 | 63.10 | 155.83 | 204.61 | 128.41 | 50.40 | 172.16 | 133.25 | 111.68 |
| 47 | 244.16 | 89.32 | 124.60 | 170.37 | 141.54 | 45.37 | 150.01 | 135.29 | 108.67 |
| 48 | 238.16 | 66.14 | 168.99 | 201.66 | 129.46 | 47.39 | 167.17 | 121.20 | 117.77 |
| 49 | 241.22 | 58.09 | 152.88 | 181.52 | 114.36 | 32.27 | 169.22 | 121.22 | 111.74 |
| 50 | 240.26 | 64.15 | 132.74 | 190.63 | 131.53 | 31.27 | 169.25 | 123.25 | 103.69 |
| 51 | 218.10 | 61.13 | 150.92 | 186.63 | 121.46 | 43.38 | 146.08 | 110.16 | 125.90 |
| 52 | 208.05 | 63.16 | 113.61 | 178.59 | 121.48 | 41.37 | 165.27 | 149.53 | 141.06 |
| 53 | 263.59 | 48.04 | 152.99 | 167.52 | 124.53 | 49.45 | 128.97 | 138.46 | 115.85 |
| 54 | 199.04 | 78.32 | 122.73 | 191.77 | 108.40 | 42.39 | 138.08 | 144.54 | 104.77 |
| 55 | 215.23 | 83.38 | 179.29 | 187.77 | 120.53 | 34.32 | 152.23 | 135.47 | 91.66  |
| 56 | 226.37 | 82.39 | 127.82 | 163.57 | 122.57 | 47.45 | 159.33 | 163.77 | 114.90 |
| 57 | 251.65 | 70.29 | 132.90 | 174.70 | 112.50 | 33.32 | 121.99 | 142.59 | 103.81 |
| 58 | 233.52 | 52.12 | 146.05 | 166.65 | 119.59 | 40.40 | 134.13 | 138.57 | 114.94 |
| 59 | 232.55 | 68.29 | 135.97 | 170.72 | 105.46 | 31.32 | 151.33 | 116.37 | 115.97 |
| 60 | 214.40 | 69.31 | 143.07 | 177.82 | 110.53 | 39.40 | 147.31 | 146.71 | 111.95 |
| 61 | 227.57 | 57.20 | 135.01 | 156.63 | 96.41  | 48.51 | 159.46 | 121.47 | 109.95 |
| 62 | 212.45 | 68.32 | 116.84 | 160.70 | 127.75 | 43.46 | 128.16 | 118.46 | 119.06 |
| 63 | 214.51 | 58.23 | 120.90 | 165.79 | 120.70 | 51.56 | 150.42 | 113.42 | 113.02 |
| 64 | 217.58 | 72.39 | 120.92 | 175.92 | 132.85 | 45.50 | 132.25 | 112.43 | 119.10 |
| 65 | 197.39 | 50.16 | 142.18 | 177.98 | 121.75 | 22.25 | 146.43 | 125.60 | 106.99 |
| 66 | 194.39 | 50.17 | 125.01 | 204.30 | 125.82 | 38.43 | 122.18 | 116.51 | 107.01 |
| 67 | 213.65 | 62.31 | 129.08 | 158.82 | 112.69 | 33.38 | 128.27 | 123.62 | 118.15 |
| 68 | 218.74 | 66.37 | 123.03 | 149.74 | 117.77 | 46.54 | 148.53 | 149.94 | 112.10 |
| 69 | 207.65 | 62.34 | 138.23 | 154.83 | 109.69 | 37.44 | 128.31 | 124.67 | 115.16 |
| 70 | 204.65 | 64.37 | 121.05 | 187.24 | 124.89 | 37.45 | 135.42 | 119.63 | 121.25 |
| 71 | 204.68 | 62.36 | 132.20 | 214.60 | 135.04 | 36.44 | 136.46 | 116.61 | 91.92  |
| 72 | 223.95 | 62.37 | 103.88 | 158.96 | 130.00 | 38.47 | 112.18 | 96.39  | 102.06 |
| 73 | 200.70 | 64.40 | 128.20 | 154.93 | 119.90 | 37.47 | 131.44 | 132.86 | 97.01  |
| 74 | 213.90 | 39.09 | 115.05 | 154.96 | 132.07 | 36.46 | 106.14 | 107.56 | 102.09 |
| 75 | 209.89 | 58.35 | 132.29 | 169.17 | 102.72 | 32.42 | 126.42 | 117.71 | 104.13 |
| 76 | 192.70 | 71.53 | 138.40 | 154.00 | 121.98 | 27.36 | 138.60 | 111.65 | 128.47 |
| 77 | 187.67 | 42.15 | 132.34 | 167.20 | 116.94 | 35.47 | 128.49 | 106.60 | 88.97  |
| 78 | 207.97 | 65.47 | 131.35 | 156.08 | 108.85 | 32.43 | 116.35 | 113.71 | 115.34 |
| 79 | 190.77 | 66.50 | 128.33 | 163.20 | 120.02 | 27.37 | 114.34 | 112.72 | 83.93  |
| 80 | 215.14 | 56.37 | 107.06 | 152.08 | 101.79 | 29.40 | 124.50 | 145.18 | 99.15  |



Whole Lung Tc-SC Counts (Pediatric CF)

| Frame | Patient |        |         |        |         |         |         |         |         |
|-------|---------|--------|---------|--------|---------|---------|---------|---------|---------|
|       | 1       | 2      | 3       | 4      | 5       | 6       | 7       | 8       | 9       |
| 1     | 553.86  | 500.80 | 2004.91 | 792.53 | 1935.22 | 1289.22 | 1842.58 | 4178.12 | 1718.72 |
| 2     | 567.37  | 365.17 | 2012.72 | 848.00 | 1898.13 | 1365.29 | 1783.05 | 4293.89 | 1812.26 |
| 3     | 576.24  | 416.56 | 2070.02 | 798.41 | 1977.45 | 1201.76 | 1666.52 | 4234.77 | 1781.49 |
| 4     | 600.58  | 397.29 | 2145.33 | 833.01 | 1922.05 | 1187.63 | 1568.68 | 4048.39 | 1804.84 |
| 5     | 654.57  | 415.66 | 1980.03 | 824.85 | 1944.57 | 1215.45 | 1574.08 | 4247.67 | 1785.15 |
| 6     | 583.76  | 377.04 | 2081.33 | 767.09 | 2004.19 | 1084.51 | 1643.43 | 4142.73 | 1741.01 |
| 7     | 603.34  | 343.43 | 1930.64 | 733.72 | 1877.29 | 1177.40 | 1521.41 | 4040.39 | 1663.18 |
| 8     | 591.26  | 447.90 | 2015.00 | 709.41 | 1936.65 | 1149.09 | 1509.68 | 4165.27 | 1795.28 |
| 9     | 601.20  | 367.19 | 1938.44 | 757.49 | 1874.17 | 1174.97 | 1562.12 | 3986.76 | 1752.45 |
| 10    | 544.76  | 365.06 | 1984.70 | 740.47 | 1882.20 | 1077.98 | 1494.92 | 4042.87 | 1756.07 |
| 11    | 617.09  | 349.90 | 1959.94 | 791.44 | 1906.14 | 1031.47 | 1486.53 | 4099.16 | 1731.30 |
| 12    | 490.28  | 348.04 | 1841.26 | 788.74 | 1892.09 | 1094.09 | 1468.52 | 4114.25 | 1708.49 |
| 13    | 515.21  | 362.11 | 1859.77 | 748.46 | 1827.91 | 1058.39 | 1486.38 | 4136.67 | 1674.79 |
| 14    | 532.37  | 404.84 | 1876.60 | 776.41 | 1812.43 | 1056.08 | 1317.63 | 4350.10 | 1710.95 |
| 15    | 589.62  | 384.76 | 1994.76 | 755.53 | 1757.16 | 963.26  | 1362.00 | 4246.11 | 1706.15 |
| 16    | 517.58  | 351.02 | 1925.14 | 695.19 | 1792.26 | 1125.79 | 1320.09 | 4249.91 | 1676.65 |
| 17    | 556.79  | 388.03 | 1923.89 | 723.30 | 1861.27 | 1001.77 | 1389.82 | 4220.90 | 1725.87 |
| 18    | 575.06  | 372.80 | 1873.88 | 678.77 | 1897.18 | 936.22  | 1402.40 | 4144.00 | 1710.40 |
| 19    | 588.07  | 326.93 | 1843.24 | 690.23 | 1851.83 | 950.46  | 1278.01 | 4247.98 | 1656.00 |
| 20    | 591.13  | 316.71 | 1902.21 | 683.28 | 1853.84 | 968.01  | 1321.75 | 4143.26 | 1716.25 |
| 21    | 488.62  | 413.37 | 1857.09 | 667.48 | 1907.89 | 882.42  | 1172.21 | 4308.88 | 1700.07 |
| 22    | 514.90  | 305.63 | 1905.14 | 696.10 | 1894.86 | 1022.12 | 1259.75 | 4147.62 | 1643.58 |
| 23    | 528.61  | 307.26 | 1777.83 | 658.96 | 1890.98 | 942.69  | 1173.50 | 3981.85 | 1725.10 |
| 24    | 522.10  | 314.93 | 1927.86 | 739.81 | 1844.73 | 923.87  | 1152.40 | 4228.89 | 1696.81 |
| 25    | 476.30  | 327.49 | 1962.78 | 761.94 | 1851.76 | 889.39  | 1188.93 | 4148.06 | 1722.32 |
| 26    | 541.36  | 294.61 | 1958.32 | 687.26 | 1785.29 | 904.56  | 1264.44 | 4267.68 | 1747.75 |
| 27    | 502.15  | 328.94 | 1952.64 | 699.93 | 1821.18 | 976.91  | 1264.25 | 4358.91 | 1670.50 |
| 28    | 509.78  | 348.51 | 1782.55 | 631.59 | 1701.84 | 863.09  | 1075.42 | 4243.16 | 1664.88 |
| 29    | 513.80  | 345.04 | 1749.98 | 638.51 | 1797.13 | 874.40  | 1214.55 | 4344.58 | 1695.42 |
| 30    | 520.53  | 306.89 | 1807.73 | 661.78 | 1838.99 | 872.18  | 1149.10 | 4268.43 | 1645.08 |
| 31    | 426.05  | 327.09 | 1810.68 | 694.46 | 1769.57 | 861.67  | 1113.50 | 4145.83 | 1643.28 |
| 32    | 546.04  | 309.86 | 1825.01 | 678.37 | 1780.95 | 952.00  | 1159.61 | 4015.99 | 1647.83 |
| 33    | 492.78  | 266.95 | 1907.60 | 651.28 | 1676.00 | 905.44  | 1186.79 | 4078.02 | 1732.17 |
| 34    | 524.52  | 297.64 | 1972.15 | 689.75 | 1780.95 | 931.96  | 1275.46 | 4201.08 | 1615.58 |
| 35    | 511.41  | 381.35 | 1928.34 | 694.92 | 1742.19 | 772.42  | 1213.15 | 4272.04 | 1764.15 |
| 36    | 420.44  | 342.68 | 1900.67 | 646.09 | 1670.32 | 950.06  | 1245.77 | 4211.12 | 1665.56 |
| 37    | 436.80  | 301.01 | 1879.98 | 674.55 | 1849.85 | 835.40  | 1200.31 | 4313.32 | 1674.29 |
| 38    | 425.53  | 293.00 | 1863.80 | 675.64 | 1783.90 | 873.92  | 1174.69 | 4396.25 | 1702.42 |
| 39    | 460.78  | 267.83 | 1845.11 | 702.47 | 1682.07 | 873.72  | 1205.47 | 4220.92 | 1508.88 |
| 40    | 442.32  | 325.58 | 1771.86 | 701.77 | 1770.72 | 795.19  | 1173.32 | 4267.77 | 1676.61 |

|    |        |        |         |        |         |        |         |         |         |
|----|--------|--------|---------|--------|---------|--------|---------|---------|---------|
| 41 | 459.37 | 273.29 | 1754.08 | 703.52 | 1609.15 | 802.29 | 1088.19 | 4166.14 | 1696.41 |
| 42 | 444.27 | 323.58 | 1914.50 | 750.90 | 1688.88 | 792.80 | 1227.01 | 4166.71 | 1589.75 |
| 43 | 480.87 | 349.93 | 1812.57 | 650.59 | 1673.99 | 886.82 | 1129.24 | 4310.99 | 1660.26 |
| 44 | 458.42 | 369.90 | 1765.91 | 765.09 | 1756.03 | 813.35 | 1146.80 | 4399.41 | 1621.87 |
| 45 | 491.10 | 306.58 | 1939.71 | 661.17 | 1867.84 | 800.13 | 1113.84 | 4431.94 | 1565.33 |
| 46 | 491.10 | 317.68 | 1844.60 | 666.45 | 1664.84 | 764.95 | 1191.01 | 4323.72 | 1671.41 |
| 47 | 421.67 | 316.95 | 1791.35 | 606.83 | 1730.87 | 840.43 | 1187.16 | 4386.24 | 1521.57 |
| 48 | 411.19 | 352.26 | 1888.76 | 716.99 | 1733.48 | 790.85 | 1096.37 | 4354.03 | 1541.67 |
| 49 | 479.01 | 338.33 | 1821.98 | 756.78 | 1674.00 | 749.05 | 1131.13 | 4164.46 | 1629.78 |
| 50 | 434.16 | 263.76 | 1803.79 | 605.33 | 1690.17 | 768.33 | 1166.60 | 4246.47 | 1567.98 |
| 51 | 536.50 | 305.05 | 1792.73 | 612.40 | 1678.54 | 867.84 | 1156.53 | 4308.05 | 1621.68 |
| 52 | 482.79 | 358.28 | 1887.52 | 660.82 | 1720.50 | 785.06 | 1223.73 | 4324.82 | 1537.43 |
| 53 | 504.36 | 320.63 | 1867.51 | 647.88 | 1753.61 | 849.27 | 1189.67 | 4318.03 | 1488.63 |
| 54 | 542.94 | 270.70 | 1804.14 | 605.45 | 1761.07 | 782.48 | 1254.79 | 4290.77 | 1584.42 |
| 55 | 358.25 | 251.03 | 1997.03 | 645.01 | 1802.13 | 821.22 | 873.99  | 4235.24 | 1547.90 |
| 56 | 433.29 | 273.19 | 1828.22 | 687.02 | 1713.17 | 847.44 | 1210.87 | 4354.96 | 1576.84 |
| 57 | 450.56 | 352.64 | 1925.61 | 676.36 | 1747.23 | 824.57 | 1156.36 | 4223.88 | 1585.01 |
| 58 | 449.34 | 332.85 | 1828.32 | 725.90 | 1744.74 | 827.78 | 1189.66 | 4302.11 | 1607.58 |
| 59 | 404.60 | 336.85 | 1828.41 | 718.09 | 1657.52 | 765.46 | 1204.58 | 4316.06 | 1529.59 |
| 60 | 518.49 | 321.74 | 1924.04 | 625.50 | 1681.24 | 786.85 | 1149.53 | 4313.58 | 1596.04 |
| 61 | 482.36 | 365.85 | 1870.91 | 645.71 | 1639.69 | 821.73 | 1092.35 | 4541.19 | 1588.69 |
| 62 | 478.82 | 299.72 | 1921.51 | 660.30 | 1718.83 | 756.31 | 1061.19 | 4613.07 | 1643.32 |
| 63 | 557.98 | 324.56 | 1896.76 | 636.79 | 1704.18 | 731.27 | 1110.21 | 4551.71 | 1513.24 |
| 64 | 522.41 | 246.86 | 1869.72 | 652.27 | 1714.92 | 811.20 | 1035.44 | 4254.59 | 1520.07 |
| 65 | 421.59 | 388.34 | 1852.05 | 690.44 | 1744.21 | 792.67 | 1081.70 | 4292.56 | 1583.95 |
| 66 | 414.31 | 328.13 | 1839.72 | 630.79 | 1706.75 | 883.18 | 1074.76 | 4346.50 | 1605.73 |
| 67 | 454.35 | 313.01 | 1911.72 | 609.26 | 1684.89 | 899.76 | 1138.20 | 4384.68 | 1581.72 |
| 68 | 561.18 | 288.05 | 1853.53 | 673.57 | 1774.49 | 811.19 | 1088.31 | 4415.39 | 1518.83 |
| 69 | 414.14 | 274.04 | 1913.04 | 554.50 | 1708.44 | 842.91 | 1073.48 | 4157.65 | 1510.38 |
| 70 | 390.70 | 242.01 | 1803.22 | 611.94 | 1755.82 | 756.68 | 1096.18 | 4328.85 | 1493.76 |
| 71 | 457.58 | 312.07 | 1924.08 | 648.17 | 1730.78 | 750.27 | 1115.14 | 4235.15 | 1489.66 |
| 72 | 536.11 | 291.75 | 1768.47 | 603.89 | 1677.28 | 901.57 | 1211.94 | 4300.82 | 1493.09 |
| 73 | 458.40 | 263.41 | 1866.22 | 629.35 | 1642.32 | 886.48 | 884.78  | 4500.89 | 1510.62 |
| 74 | 446.69 | 311.90 | 1902.90 | 648.19 | 1704.12 | 810.95 | 1103.10 | 4439.19 | 1485.44 |
| 75 | 483.15 | 277.57 | 1831.61 | 555.47 | 1784.91 | 745.99 | 1147.18 | 4447.55 | 1591.87 |
| 76 | 456.08 | 270.63 | 1911.35 | 550.06 | 1763.46 | 817.73 | 1120.35 | 4461.55 | 1452.03 |
| 77 | 481.66 | 281.02 | 1962.88 | 548.75 | 1641.37 | 773.53 | 1052.86 | 4518.54 | 1590.18 |
| 78 | 492.77 | 278.22 | 1912.38 | 568.72 | 1793.78 | 773.06 | 1093.44 | 4639.75 | 1388.98 |
| 79 | 443.87 | 256.00 | 1889.90 | 559.85 | 1722.22 | 840.02 | 1124.17 | 4448.67 | 1547.68 |
| 80 | 473.22 | 284.16 | 1882.21 | 587.38 | 1664.15 | 837.48 | 985.53  | 4396.45 | 1433.74 |

Central Lung Tc-SC Counts (Pediatric CF)

| Frame | Patient |        |        |        |        |        |        |         |        |
|-------|---------|--------|--------|--------|--------|--------|--------|---------|--------|
|       | 1       | 2      | 3      | 4      | 5      | 6      | 7      | 8       | 9      |
| 1     | 249.74  | 205.33 | 726.39 | 337.99 | 919.30 | 552.42 | 847.18 | 1822.34 | 658.68 |
| 2     | 205.34  | 164.31 | 677.04 | 342.95 | 832.50 | 553.39 | 802.44 | 1907.24 | 707.96 |
| 3     | 210.71  | 176.97 | 686.95 | 309.89 | 940.64 | 519.11 | 693.35 | 1800.60 | 737.26 |
| 4     | 252.61  | 174.77 | 705.15 | 312.00 | 906.13 | 463.71 | 615.77 | 1720.11 | 765.76 |
| 5     | 263.02  | 138.88 | 625.11 | 301.75 | 874.71 | 512.54 | 570.73 | 1756.15 | 743.90 |
| 6     | 206.76  | 161.58 | 658.07 | 270.18 | 899.42 | 450.99 | 615.69 | 1849.87 | 689.06 |
| 7     | 202.92  | 130.56 | 596.13 | 276.52 | 898.02 | 497.09 | 637.96 | 1833.30 | 668.09 |
| 8     | 194.39  | 178.67 | 657.67 | 232.75 | 900.76 | 458.97 | 579.01 | 1846.44 | 726.94 |
| 9     | 233.30  | 163.00 | 585.00 | 256.82 | 843.78 | 515.68 | 639.62 | 1702.60 | 737.45 |
| 10    | 217.79  | 133.75 | 606.86 | 242.25 | 821.22 | 421.24 | 545.03 | 1791.93 | 690.05 |
| 11    | 217.28  | 146.49 | 600.52 | 265.67 | 804.14 | 429.11 | 616.52 | 1900.69 | 656.73 |
| 12    | 162.88  | 144.23 | 565.63 | 231.39 | 882.34 | 416.45 | 533.42 | 1878.91 | 710.83 |
| 13    | 187.22  | 127.14 | 550.27 | 277.78 | 794.70 | 421.96 | 561.37 | 1909.47 | 629.62 |
| 14    | 169.40  | 168.96 | 567.04 | 294.52 | 764.15 | 399.35 | 543.07 | 2083.61 | 654.45 |
| 15    | 177.46  | 157.93 | 594.27 | 268.06 | 737.75 | 427.51 | 579.16 | 2014.08 | 582.58 |
| 16    | 200.94  | 139.40 | 616.48 | 260.55 | 786.36 | 492.90 | 516.03 | 2065.90 | 628.75 |
| 17    | 201.32  | 159.83 | 597.08 | 303.10 | 797.93 | 411.09 | 542.99 | 1972.98 | 706.96 |
| 18    | 181.50  | 160.14 | 576.18 | 231.31 | 828.17 | 421.42 | 517.66 | 1912.44 | 640.85 |
| 19    | 157.81  | 137.15 | 599.64 | 242.08 | 868.16 | 379.71 | 467.46 | 2028.56 | 618.58 |
| 20    | 168.19  | 106.33 | 588.05 | 269.83 | 850.35 | 407.18 | 441.39 | 1987.31 | 660.97 |
| 21    | 139.14  | 131.25 | 559.57 | 230.83 | 844.42 | 346.86 | 380.27 | 2113.82 | 657.82 |
| 22    | 168.07  | 97.08  | 596.10 | 215.31 | 863.27 | 372.97 | 381.15 | 1954.16 | 631.56 |
| 23    | 133.40  | 127.53 | 624.83 | 215.14 | 839.26 | 407.31 | 364.34 | 1963.53 | 604.02 |
| 24    | 181.82  | 108.65 | 600.02 | 256.19 | 823.78 | 335.93 | 374.92 | 1994.34 | 628.79 |
| 25    | 157.58  | 116.71 | 666.25 | 257.23 | 790.20 | 295.71 | 396.35 | 1931.99 | 644.79 |
| 26    | 159.01  | 124.25 | 654.32 | 229.54 | 779.41 | 307.33 | 386.09 | 1940.14 | 621.81 |
| 27    | 166.65  | 130.49 | 647.66 | 283.45 | 814.83 | 345.47 | 415.22 | 2048.21 | 631.88 |
| 28    | 154.37  | 117.30 | 511.47 | 205.92 | 698.78 | 335.11 | 364.15 | 1955.19 | 627.33 |
| 29    | 139.78  | 112.49 | 502.34 | 206.63 | 786.01 | 344.68 | 395.86 | 2054.68 | 560.93 |
| 30    | 119.74  | 151.11 | 597.52 | 213.29 | 871.58 | 348.03 | 347.20 | 2031.40 | 510.70 |
| 31    | 109.33  | 98.36  | 576.15 | 220.96 | 816.74 | 348.46 | 326.69 | 2078.65 | 572.58 |
| 32    | 152.15  | 87.77  | 591.31 | 223.93 | 776.14 | 345.34 | 394.44 | 2041.82 | 590.54 |
| 33    | 181.76  | 83.96  | 572.71 | 232.97 | 771.51 | 342.74 | 367.48 | 2038.06 | 594.12 |
| 34    | 139.50  | 84.59  | 639.14 | 234.91 | 789.32 | 391.34 | 390.68 | 2136.94 | 629.13 |
| 35    | 162.59  | 128.07 | 684.20 | 240.36 | 782.83 | 275.95 | 374.19 | 2078.36 | 605.98 |
| 36    | 159.88  | 138.75 | 535.83 | 225.05 | 746.13 | 395.86 | 381.57 | 2023.91 | 468.47 |
| 37    | 148.89  | 137.43 | 555.62 | 203.14 | 876.42 | 302.25 | 395.74 | 1994.98 | 569.70 |
| 38    | 149.09  | 75.79  | 617.72 | 221.85 | 840.87 | 297.39 | 380.60 | 2074.87 | 556.30 |
| 39    | 154.25  | 87.08  | 491.14 | 271.00 | 742.90 | 330.80 | 422.55 | 1913.63 | 450.50 |
| 40    | 170.78  | 146.01 | 586.95 | 215.71 | 745.96 | 296.00 | 394.22 | 1998.80 | 500.22 |

|    |        |        |        |        |        |        |        |         |        |
|----|--------|--------|--------|--------|--------|--------|--------|---------|--------|
| 41 | 128.51 | 122.30 | 516.50 | 264.79 | 718.38 | 253.72 | 370.89 | 2066.29 | 486.84 |
| 42 | 112.42 | 135.46 | 581.33 | 241.41 | 751.99 | 278.61 | 387.90 | 1987.88 | 467.18 |
| 43 | 161.12 | 124.90 | 584.34 | 214.02 | 748.71 | 300.44 | 438.78 | 2013.04 | 518.41 |
| 44 | 155.19 | 128.08 | 617.41 | 268.90 | 766.07 | 281.52 | 412.15 | 2167.90 | 505.57 |
| 45 | 151.93 | 114.15 | 626.75 | 221.51 | 763.46 | 312.77 | 375.60 | 2220.85 | 475.97 |
| 46 | 182.18 | 108.72 | 608.05 | 246.20 | 700.02 | 268.12 | 400.34 | 2240.87 | 554.37 |
| 47 | 127.11 | 93.61  | 596.55 | 216.54 | 734.95 | 273.01 | 393.14 | 2180.04 | 518.47 |
| 48 | 131.98 | 129.11 | 561.52 | 248.74 | 808.63 | 264.52 | 339.11 | 2076.88 | 468.28 |
| 49 | 151.71 | 90.74  | 546.73 | 281.53 | 722.83 | 250.47 | 391.59 | 2053.12 | 524.04 |
| 50 | 141.24 | 113.73 | 545.05 | 219.19 | 699.85 | 297.73 | 361.69 | 2110.35 | 553.70 |
| 51 | 179.57 | 94.26  | 612.51 | 216.41 | 684.74 | 338.52 | 437.06 | 2111.41 | 529.31 |
| 52 | 160.65 | 150.16 | 589.47 | 246.01 | 696.19 | 321.98 | 392.65 | 2218.78 | 471.63 |
| 53 | 154.80 | 110.65 | 543.21 | 207.53 | 719.41 | 317.07 | 415.25 | 2170.94 | 500.07 |
| 54 | 150.86 | 105.65 | 573.90 | 232.65 | 726.33 | 304.12 | 415.23 | 2136.91 | 475.08 |
| 55 | 156.86 | 120.51 | 647.16 | 246.43 | 712.66 | 289.15 | 304.91 | 2116.10 | 496.47 |
| 56 | 120.79 | 115.29 | 581.71 | 201.86 | 700.96 | 306.65 | 345.51 | 2164.29 | 494.42 |
| 57 | 154.36 | 146.51 | 604.16 | 220.03 | 762.85 | 255.07 | 390.11 | 2148.83 | 547.40 |
| 58 | 141.39 | 130.86 | 590.55 | 242.19 | 701.59 | 270.06 | 424.14 | 2209.88 | 483.44 |
| 59 | 136.13 | 120.50 | 669.50 | 240.42 | 700.27 | 295.04 | 382.18 | 2163.20 | 531.18 |
| 60 | 168.76 | 126.88 | 712.29 | 227.42 | 711.21 | 303.37 | 389.94 | 2204.15 | 502.03 |
| 61 | 151.89 | 136.90 | 756.01 | 248.37 | 686.03 | 305.71 | 350.07 | 2395.77 | 565.63 |
| 62 | 118.22 | 107.64 | 664.60 | 209.69 | 706.98 | 246.17 | 368.89 | 2383.85 | 576.84 |
| 63 | 171.08 | 75.81  | 693.98 | 203.32 | 670.34 | 189.74 | 401.68 | 2367.23 | 520.76 |
| 64 | 181.04 | 90.15  | 731.68 | 210.74 | 694.13 | 262.64 | 300.59 | 2152.50 | 472.95 |
| 65 | 118.36 | 143.56 | 623.33 | 216.78 | 760.26 | 239.16 | 352.53 | 2252.28 | 570.02 |
| 66 | 140.39 | 142.43 | 598.13 | 206.15 | 684.02 | 300.25 | 395.12 | 2240.03 | 491.10 |
| 67 | 136.36 | 129.02 | 567.02 | 192.36 | 693.92 | 301.03 | 418.90 | 2291.33 | 515.71 |
| 68 | 192.18 | 109.61 | 674.23 | 217.39 | 689.51 | 233.95 | 396.72 | 2223.26 | 470.00 |
| 69 | 123.33 | 89.51  | 679.24 | 195.28 | 662.21 | 249.83 | 354.58 | 2192.97 | 494.31 |
| 70 | 157.15 | 125.07 | 655.09 | 214.11 | 677.41 | 230.57 | 367.67 | 2245.64 | 473.97 |
| 71 | 161.14 | 131.52 | 726.79 | 198.21 | 709.97 | 254.38 | 369.87 | 2196.38 | 453.42 |
| 72 | 226.22 | 128.93 | 726.37 | 181.97 | 693.48 | 298.23 | 388.09 | 2042.49 | 460.16 |
| 73 | 117.38 | 111.42 | 725.78 | 171.67 | 701.70 | 285.34 | 290.38 | 2459.23 | 459.45 |
| 74 | 126.06 | 109.88 | 798.76 | 219.60 | 687.72 | 244.92 | 322.64 | 2469.45 | 462.68 |
| 75 | 133.22 | 138.05 | 678.14 | 195.95 | 741.03 | 226.67 | 357.63 | 2384.52 | 527.26 |
| 76 | 135.31 | 119.69 | 671.60 | 189.08 | 711.87 | 273.87 | 290.71 | 2366.67 | 471.60 |
| 77 | 147.61 | 103.10 | 598.04 | 209.00 | 711.82 | 189.95 | 342.16 | 2394.86 | 457.49 |
| 78 | 127.67 | 110.01 | 600.44 | 216.44 | 724.14 | 209.15 | 297.84 | 2532.64 | 449.59 |
| 79 | 64.69  | 88.65  | 590.42 | 180.89 | 704.59 | 240.04 | 378.36 | 2381.99 | 487.41 |
| 80 | 163.85 | 107.02 | 583.14 | 228.62 | 637.23 | 259.45 | 296.07 | 2364.15 | 427.49 |

Whole Lung In-DTPA Counts (Pediatric CF)

| Frame | Patient |       |        |        |        |        |        |        |        |
|-------|---------|-------|--------|--------|--------|--------|--------|--------|--------|
|       | 1       | 2     | 3      | 4      | 5      | 6      | 7      | 8      | 9      |
| 1     | 124.62  | 88.02 | 240.44 | 122.42 | 237.04 | 206.04 | 286.45 | 382.27 | 236.44 |
| 2     | 124.64  | 62.02 | 260.29 | 99.23  | 238.08 | 183.06 | 316.51 | 374.33 | 261.69 |
| 3     | 113.66  | 95.45 | 265.34 | 96.25  | 266.74 | 223.12 | 299.55 | 406.41 | 254.73 |
| 4     | 80.66   | 57.44 | 286.60 | 96.67  | 238.76 | 181.93 | 280.59 | 351.44 | 250.77 |
| 5     | 98.88   | 55.45 | 275.64 | 71.66  | 245.81 | 194.97 | 283.24 | 427.37 | 253.02 |
| 6     | 99.70   | 69.47 | 255.66 | 86.69  | 226.83 | 195.00 | 268.28 | 374.39 | 249.06 |
| 7     | 88.71   | 73.49 | 261.71 | 80.70  | 240.89 | 197.44 | 260.31 | 386.87 | 204.05 |
| 8     | 100.74  | 66.49 | 241.73 | 73.70  | 206.88 | 175.44 | 279.38 | 389.13 | 244.14 |
| 9     | 92.94   | 50.48 | 239.17 | 95.75  | 227.95 | 184.49 | 302.47 | 361.16 | 213.13 |
| 10    | 102.98  | 67.52 | 244.22 | 60.70  | 218.98 | 170.49 | 265.86 | 387.27 | 224.39 |
| 11    | 82.96   | 69.53 | 221.22 | 72.74  | 208.99 | 180.74 | 266.30 | 393.34 | 209.40 |
| 12    | 88.78   | 59.52 | 232.28 | 64.73  | 233.08 | 150.71 | 281.18 | 371.37 | 228.07 |
| 13    | 87.80   | 67.35 | 239.33 | 66.95  | 216.08 | 171.38 | 244.15 | 357.40 | 194.03 |
| 14    | 83.80   | 50.32 | 236.37 | 67.96  | 230.15 | 143.55 | 213.51 | 341.02 | 220.13 |
| 15    | 49.33   | 61.36 | 242.42 | 65.97  | 237.21 | 139.56 | 229.19 | 388.20 | 230.19 |
| 16    | 66.38   | 56.35 | 243.47 | 74.00  | 241.26 | 137.58 | 188.12 | 359.19 | 233.24 |
| 17    | 70.41   | 57.37 | 249.53 | 69.00  | 190.15 | 157.66 | 193.97 | 338.19 | 231.27 |
| 18    | 90.48   | 53.36 | 221.48 | 54.97  | 203.23 | 155.68 | 234.12 | 345.27 | 209.25 |
| 19    | 77.45   | 46.95 | 214.50 | 69.03  | 210.09 | 142.67 | 218.91 | 356.36 | 201.26 |
| 20    | 69.44   | 50.97 | 218.55 | 74.05  | 235.21 | 132.66 | 215.94 | 327.32 | 191.26 |
| 21    | 82.50   | 62.02 | 212.57 | 63.03  | 235.25 | 133.68 | 200.92 | 368.53 | 216.38 |
| 22    | 82.51   | 49.99 | 208.59 | 72.07  | 214.21 | 116.64 | 198.35 | 348.52 | 219.43 |
| 23    | 72.49   | 66.06 | 192.56 | 50.00  | 221.88 | 119.67 | 220.47 | 350.58 | 181.32 |
| 24    | 60.25   | 52.82 | 229.95 | 56.43  | 214.28 | 96.60  | 222.52 | 362.69 | 199.42 |
| 25    | 72.31   | 64.88 | 187.81 | 55.44  | 201.87 | 129.76 | 197.25 | 328.61 | 204.48 |
| 26    | 73.33   | 49.82 | 204.91 | 48.42  | 205.92 | 131.79 | 166.14 | 343.73 | 192.46 |
| 27    | 54.25   | 45.81 | 226.05 | 53.45  | 222.03 | 108.70 | 186.26 | 339.77 | 189.28 |
| 28    | 51.05   | 56.87 | 196.34 | 42.40  | 189.91 | 123.79 | 194.33 | 351.89 | 214.03 |
| 29    | 67.13   | 70.35 | 213.46 | 47.44  | 204.42 | 100.70 | 196.98 | 341.90 | 233.16 |
| 30    | 64.13   | 67.35 | 207.07 | 42.02  | 219.93 | 96.09  | 178.92 | 361.06 | 210.08 |
| 31    | 72.59   | 36.39 | 196.04 | 47.85  | 197.85 | 112.20 | 163.87 | 326.94 | 210.12 |
| 32    | 64.15   | 50.07 | 204.12 | 58.72  | 160.68 | 101.15 | 149.82 | 316.94 | 212.57 |
| 33    | 47.07   | 36.00 | 188.67 | 56.72  | 202.95 | 110.22 | 164.33 | 301.71 | 189.47 |
| 34    | 36.01   | 39.83 | 209.82 | 49.69  | 174.22 | 118.29 | 201.78 | 325.70 | 199.56 |
| 35    | 62.17   | 53.72 | 195.37 | 41.65  | 192.35 | 110.26 | 182.09 | 317.71 | 171.43 |
| 36    | 57.15   | 37.63 | 184.14 | 52.52  | 185.34 | 105.25 | 186.15 | 331.85 | 201.64 |
| 37    | 57.36   | 48.11 | 183.16 | 36.43  | 192.42 | 90.17  | 197.25 | 372.16 | 203.29 |
| 38    | 54.35   | 56.37 | 196.08 | 31.40  | 188.43 | 107.10 | 173.13 | 325.92 | 183.19 |
| 39    | 48.32   | 44.50 | 181.41 | 39.46  | 202.55 | 91.01  | 176.18 | 314.90 | 188.26 |
| 40    | 49.34   | 43.50 | 206.01 | 47.53  | 196.55 | 105.12 | 158.08 | 354.03 | 176.21 |

|    |       |       |        |       |        |        |        |        |        |
|----|-------|-------|--------|-------|--------|--------|--------|--------|--------|
| 41 | 54.18 | 53.58 | 181.88 | 36.46 | 205.64 | 92.05  | 152.07 | 278.56 | 182.28 |
| 42 | 47.14 | 49.36 | 194.00 | 45.73 | 219.78 | 91.06  | 179.29 | 306.81 | 177.28 |
| 43 | 66.69 | 40.30 | 185.97 | 41.10 | 177.71 | 95.10  | 151.11 | 324.99 | 179.32 |
| 44 | 69.73 | 40.30 | 184.59 | 25.79 | 194.67 | 105.19 | 155.77 | 316.99 | 173.51 |
| 45 | 51.60 | 36.28 | 204.78 | 28.82 | 192.89 | 85.06  | 163.66 | 282.78 | 149.75 |
| 46 | 55.64 | 40.52 | 173.57 | 46.97 | 146.55 | 82.05  | 159.46 | 344.31 | 181.03 |
| 47 | 57.66 | 66.13 | 206.86 | 36.90 | 185.90 | 89.12  | 133.88 | 302.03 | 162.91 |
| 48 | 60.70 | 45.98 | 162.33 | 27.83 | 170.80 | 73.00  | 142.57 | 279.90 | 166.97 |
| 49 | 55.67 | 54.26 | 204.72 | 36.51 | 195.04 | 96.21  | 132.51 | 293.06 | 155.91 |
| 50 | 53.66 | 31.07 | 188.01 | 50.43 | 177.52 | 73.03  | 140.00 | 336.48 | 142.82 |
| 51 | 34.50 | 58.11 | 172.71 | 31.07 | 185.62 | 95.23  | 118.03 | 300.22 | 150.92 |
| 52 | 62.76 | 58.12 | 174.76 | 41.17 | 189.69 | 109.37 | 151.55 | 315.41 | 143.88 |
| 53 | 61.76 | 38.35 | 207.89 | 41.17 | 165.50 | 72.05  | 163.28 | 291.24 | 148.95 |
| 54 | 60.76 | 53.49 | 150.39 | 36.74 | 154.43 | 78.12  | 144.33 | 300.58 | 138.88 |
| 55 | 42.80 | 41.59 | 150.42 | 36.75 | 165.56 | 85.20  | 121.34 | 274.58 | 162.13 |
| 56 | 59.97 | 53.11 | 162.56 | 35.74 | 189.01 | 74.11  | 144.99 | 297.85 | 151.05 |
| 57 | 51.91 | 46.05 | 183.79 | 28.07 | 188.84 | 88.26  | 137.95 | 289.83 | 149.05 |
| 58 | 45.65 | 57.98 | 187.86 | 43.63 | 203.01 | 84.64  | 157.56 | 322.20 | 160.19 |
| 59 | 50.51 | 56.97 | 191.94 | 35.56 | 161.63 | 68.49  | 129.71 | 276.79 | 143.04 |
| 60 | 47.08 | 50.92 | 161.66 | 26.27 | 179.04 | 73.55  | 113.57 | 258.65 | 158.22 |
| 61 | 49.52 | 40.83 | 178.87 | 20.21 | 158.25 | 81.85  | 124.09 | 306.19 | 117.83 |
| 62 | 47.30 | 46.90 | 153.83 | 31.33 | 149.38 | 60.85  | 118.05 | 320.40 | 134.02 |
| 63 | 56.41 | 49.94 | 168.01 | 22.24 | 155.68 | 77.03  | 112.01 | 263.84 | 110.79 |
| 64 | 46.51 | 50.15 | 177.14 | 34.38 | 155.70 | 69.97  | 110.21 | 260.85 | 153.28 |
| 65 | 39.44 | 41.26 | 180.20 | 43.69 | 150.67 | 93.24  | 138.54 | 274.05 | 154.31 |
| 66 | 48.75 | 26.70 | 186.30 | 28.52 | 153.73 | 77.07  | 100.33 | 278.74 | 144.23 |
| 67 | 60.90 | 31.36 | 163.67 | 37.63 | 157.81 | 61.91  | 91.45  | 306.11 | 126.04 |
| 68 | 32.38 | 37.44 | 142.66 | 37.64 | 142.86 | 73.05  | 109.07 | 289.97 | 126.07 |
| 69 | 34.61 | 48.98 | 161.91 | 22.46 | 171.22 | 55.86  | 98.36  | 285.16 | 140.25 |
| 70 | 49.59 | 35.42 | 157.89 | 36.44 | 132.79 | 67.00  | 97.57  | 272.26 | 132.18 |
| 71 | 41.50 | 41.10 | 149.41 | 27.13 | 155.08 | 70.05  | 87.87  | 252.26 | 138.28 |
| 72 | 36.45 | 44.14 | 162.40 | 21.06 | 156.12 | 54.88  | 112.18 | 277.01 | 163.61 |
| 73 | 34.43 | 41.11 | 132.25 | 29.16 | 181.87 | 71.09  | 77.97  | 270.17 | 121.11 |
| 74 | 31.60 | 35.04 | 163.67 | 20.26 | 149.49 | 60.97  | 81.23  | 263.13 | 159.62 |
| 75 | 37.48 | 27.96 | 183.96 | 26.95 | 125.20 | 54.90  | 77.39  | 292.95 | 119.13 |
| 76 | 21.68 | 37.89 | 169.80 | 26.95 | 164.74 | 67.07  | 97.87  | 252.48 | 132.32 |
| 77 | 40.94 | 32.22 | 166.79 | 27.97 | 138.42 | 77.22  | 88.77  | 260.63 | 119.17 |
| 78 | 42.77 | 27.57 | 149.59 | 31.42 | 153.65 | 64.05  | 89.80  | 269.79 | 128.31 |
| 79 | 43.18 | 38.32 | 169.89 | 18.04 | 139.48 | 67.11  | 84.34  | 251.59 | 111.10 |
| 80 | 35.08 | 36.30 | 160.80 | 23.72 | 147.62 | 67.12  | 98.75  | 259.75 | 113.15 |

Central Lung In-DTPA Counts (Pediatric CF)

| Frame | Patient |       |        |       |        |        |        |        |        |
|-------|---------|-------|--------|-------|--------|--------|--------|--------|--------|
|       | 1       | 2     | 3      | 4     | 5      | 6      | 7      | 8      | 9      |
| 1     | 46.21   | 46.61 | 107.42 | 53.41 | 116.62 | 113.42 | 144.62 | 192.43 | 107.82 |
| 2     | 47.22   | 30.61 | 91.43  | 43.41 | 114.64 | 80.43  | 157.65 | 181.46 | 116.84 |
| 3     | 38.62   | 47.62 | 109.46 | 42.42 | 151.28 | 116.46 | 140.67 | 174.49 | 106.86 |
| 4     | 39.63   | 26.62 | 91.46  | 34.82 | 129.29 | 96.47  | 137.69 | 163.51 | 105.87 |
| 5     | 41.04   | 32.63 | 89.48  | 38.83 | 135.12 | 87.48  | 131.11 | 199.57 | 93.68  |
| 6     | 37.24   | 30.63 | 80.48  | 42.84 | 109.11 | 93.50  | 127.13 | 173.58 | 108.71 |
| 7     | 33.24   | 30.64 | 86.50  | 28.83 | 123.15 | 90.91  | 111.13 | 196.24 | 91.71  |
| 8     | 37.25   | 27.64 | 88.52  | 30.84 | 105.14 | 75.90  | 131.18 | 194.27 | 96.73  |
| 9     | 39.26   | 15.62 | 78.72  | 41.86 | 108.17 | 77.92  | 136.21 | 184.28 | 84.73  |
| 10    | 37.26   | 20.64 | 90.76  | 32.86 | 94.56  | 81.94  | 132.03 | 195.34 | 99.57  |
| 11    | 36.27   | 32.66 | 80.75  | 30.86 | 99.59  | 91.17  | 128.84 | 195.57 | 104.60 |
| 12    | 32.07   | 31.67 | 81.77  | 32.87 | 125.66 | 71.15  | 116.84 | 205.62 | 98.40  |
| 13    | 29.06   | 34.08 | 83.79  | 28.26 | 87.60  | 88.80  | 120.87 | 189.62 | 76.37  |
| 14    | 28.07   | 19.05 | 79.79  | 33.28 | 104.65 | 71.37  | 101.84 | 181.64 | 83.40  |
| 15    | 16.04   | 34.09 | 84.82  | 33.29 | 109.68 | 77.40  | 109.08 | 206.73 | 111.89 |
| 16    | 26.07   | 20.06 | 68.79  | 34.29 | 98.67  | 74.40  | 88.04  | 189.72 | 97.87  |
| 17    | 24.07   | 24.07 | 77.83  | 32.29 | 84.65  | 71.41  | 89.46  | 170.70 | 95.88  |
| 18    | 38.12   | 26.08 | 86.87  | 21.27 | 86.67  | 63.40  | 102.52 | 182.76 | 93.89  |
| 19    | 16.05   | 14.65 | 73.84  | 31.30 | 95.71  | 65.41  | 72.64  | 181.79 | 88.89  |
| 20    | 24.08   | 20.67 | 85.89  | 33.31 | 118.81 | 49.37  | 94.73  | 175.80 | 77.87  |
| 21    | 29.10   | 35.73 | 68.85  | 25.29 | 120.84 | 54.40  | 77.68  | 199.92 | 101.37 |
| 22    | 29.11   | 15.66 | 66.85  | 28.51 | 96.77  | 61.43  | 78.30  | 185.90 | 108.21 |
| 23    | 22.09   | 24.70 | 59.84  | 24.50 | 105.82 | 47.39  | 89.35  | 189.95 | 58.23  |
| 24    | 14.26   | 23.70 | 98.41  | 26.71 | 114.87 | 44.38  | 96.40  | 185.97 | 76.31  |
| 25    | 26.31   | 27.72 | 66.28  | 26.71 | 104.45 | 41.38  | 77.53  | 181.98 | 85.37  |
| 26    | 30.34   | 28.73 | 68.30  | 15.67 | 94.42  | 54.44  | 65.49  | 184.02 | 71.32  |
| 27    | 16.28   | 12.66 | 61.28  | 22.71 | 96.65  | 50.43  | 87.61  | 186.06 | 72.33  |
| 28    | 22.71   | 21.70 | 57.28  | 16.68 | 79.58  | 60.49  | 71.14  | 187.10 | 83.20  |
| 29    | 10.65   | 29.55 | 75.37  | 20.70 | 95.68  | 49.45  | 96.08  | 201.20 | 89.24  |
| 30    | 24.73   | 30.76 | 74.78  | 21.11 | 123.84 | 50.46  | 69.96  | 196.21 | 76.19  |
| 31    | 19.91   | 17.49 | 65.75  | 19.30 | 84.65  | 55.49  | 68.97  | 180.16 | 78.22  |
| 32    | 21.32   | 23.93 | 70.79  | 21.12 | 83.66  | 40.42  | 69.98  | 191.25 | 80.44  |
| 33    | 22.53   | 14.68 | 57.32  | 22.13 | 94.74  | 53.70  | 72.21  | 177.40 | 79.45  |
| 34    | 9.46    | 16.70 | 82.48  | 18.11 | 96.36  | 62.77  | 84.89  | 184.88 | 61.36  |
| 35    | 17.30   | 23.14 | 69.01  | 14.69 | 103.42 | 48.69  | 74.85  | 183.50 | 59.36  |
| 36    | 18.31   | 15.09 | 68.62  | 16.50 | 91.36  | 44.68  | 73.86  | 177.50 | 79.49  |
| 37    | 25.76   | 7.25  | 62.60  | 8.45  | 99.43  | 38.65  | 83.93  | 194.63 | 73.06  |
| 38    | 16.71   | 25.97 | 63.41  | 9.46  | 97.43  | 41.07  | 69.85  | 174.54 | 66.03  |
| 39    | 9.66    | 17.52 | 52.75  | 12.48 | 86.18  | 51.14  | 62.82  | 151.41 | 65.03  |
| 40    | 16.71   | 15.51 | 72.50  | 15.51 | 82.16  | 47.12  | 53.77  | 192.32 | 63.03  |

|    |       |       |       |       |        |       |       |        |       |
|----|-------|-------|-------|-------|--------|-------|-------|--------|-------|
| 41 | 14.70 | 19.94 | 56.40 | 10.47 | 100.30 | 39.07 | 69.89 | 160.12 | 51.96 |
| 42 | 17.73 | 24.17 | 71.51 | 15.51 | 95.29  | 37.07 | 75.95 | 173.25 | 71.11 |
| 43 | 18.54 | 13.10 | 62.46 | 10.88 | 87.85  | 36.07 | 59.84 | 176.30 | 64.07 |
| 44 | 20.55 | 17.13 | 69.32 | 7.86  | 78.19  | 43.12 | 58.64 | 192.45 | 63.48 |
| 45 | 19.55 | 14.11 | 66.31 | 7.86  | 81.02  | 36.08 | 59.66 | 145.12 | 63.69 |
| 46 | 20.56 | 17.13 | 70.35 | 18.95 | 63.90  | 38.10 | 59.87 | 190.50 | 55.64 |
| 47 | 17.54 | 32.66 | 67.75 | 13.31 | 85.08  | 47.18 | 58.87 | 172.39 | 72.79 |
| 48 | 21.58 | 24.60 | 53.64 | 6.25  | 94.58  | 30.05 | 44.36 | 166.37 | 55.66 |
| 49 | 25.61 | 18.76 | 72.81 | 18.96 | 83.50  | 38.12 | 68.98 | 169.42 | 52.64 |
| 50 | 24.61 | 9.68  | 65.76 | 21.38 | 82.71  | 38.13 | 61.53 | 187.61 | 68.79 |
| 51 | 16.54 | 24.41 | 57.30 | 12.31 | 77.68  | 44.19 | 52.86 | 184.61 | 57.70 |
| 52 | 25.63 | 24.42 | 69.42 | 14.33 | 70.63  | 41.17 | 58.52 | 193.72 | 52.67 |
| 53 | 16.55 | 12.92 | 70.64 | 19.58 | 86.38  | 37.14 | 57.93 | 181.24 | 57.72 |
| 54 | 15.54 | 31.09 | 49.46 | 19.18 | 70.25  | 37.14 | 69.85 | 159.07 | 47.64 |
| 55 | 16.76 | 16.56 | 52.49 | 8.08  | 78.34  | 38.16 | 48.46 | 168.99 | 59.76 |
| 56 | 28.07 | 19.18 | 53.51 | 15.75 | 73.50  | 21.00 | 57.96 | 176.09 | 53.71 |
| 57 | 23.02 | 18.38 | 66.65 | 10.70 | 74.73  | 31.10 | 41.81 | 160.97 | 59.78 |
| 58 | 19.80 | 24.24 | 63.83 | 13.94 | 87.87  | 32.32 | 67.27 | 177.16 | 63.83 |
| 59 | 18.79 | 29.30 | 62.83 | 7.88  | 77.78  | 39.60 | 58.79 | 153.95 | 47.68 |
| 60 | 10.71 | 21.22 | 62.84 | 5.66  | 77.80  | 26.47 | 52.74 | 153.98 | 64.87 |
| 61 | 8.89  | 14.15 | 65.89 | 8.69  | 71.55  | 28.09 | 44.67 | 188.36 | 48.71 |
| 62 | 9.10  | 19.20 | 61.86 | 6.67  | 68.12  | 30.32 | 46.49 | 184.35 | 43.66 |
| 63 | 20.22 | 14.15 | 67.93 | 8.69  | 77.64  | 25.27 | 57.82 | 167.20 | 41.65 |
| 64 | 27.30 | 18.00 | 61.47 | 19.82 | 70.77  | 32.35 | 42.46 | 162.78 | 52.78 |
| 65 | 20.22 | 14.36 | 72.61 | 7.69  | 77.87  | 33.37 | 61.69 | 150.67 | 48.74 |
| 66 | 24.48 | 12.95 | 55.43 | 7.69  | 57.65  | 36.41 | 41.67 | 170.12 | 50.77 |
| 67 | 23.47 | 12.95 | 63.33 | 12.75 | 77.89  | 19.22 | 46.53 | 167.11 | 47.75 |
| 68 | 16.19 | 12.95 | 49.98 | 16.80 | 61.31  | 30.35 | 44.32 | 162.08 | 32.58 |
| 69 | 13.76 | 17.61 | 68.20 | 10.73 | 81.56  | 22.26 | 31.37 | 177.90 | 43.72 |
| 70 | 23.89 | 13.16 | 64.17 | 11.94 | 48.18  | 23.28 | 45.14 | 171.05 | 52.63 |
| 71 | 15.79 | 19.64 | 55.88 | 11.54 | 66.41  | 36.44 | 33.81 | 163.79 | 52.64 |
| 72 | 13.77 | 20.65 | 77.35 | 9.52  | 77.55  | 23.29 | 42.93 | 154.91 | 59.73 |
| 73 | 9.52  | 12.56 | 52.05 | 16.61 | 89.52  | 27.34 | 33.42 | 166.07 | 38.48 |
| 74 | 8.51  | 13.57 | 60.16 | 8.30  | 52.06  | 35.45 | 30.38 | 168.13 | 69.88 |
| 75 | 11.75 | 13.57 | 65.64 | 12.56 | 64.22  | 24.31 | 29.38 | 177.07 | 36.47 |
| 76 | 9.93  | 16.01 | 61.60 | 7.50  | 71.33  | 26.34 | 45.19 | 140.63 | 40.53 |
| 77 | 10.94 | 22.09 | 55.53 | 11.75 | 62.22  | 30.40 | 37.09 | 161.93 | 39.52 |
| 78 | 21.49 | 9.32  | 47.43 | 6.89  | 77.43  | 22.30 | 39.12 | 186.28 | 53.72 |
| 79 | 6.89  | 20.48 | 54.54 | 4.26  | 56.16  | 23.31 | 24.53 | 150.83 | 35.48 |
| 80 | 11.56 | 14.19 | 49.48 | 11.15 | 69.35  | 37.51 | 38.32 | 166.07 | 42.58 |
