# Supplementary material for: A Physiologically-Motivated Compartment-Based Model of the Effect of Inhaled Hypertonic Saline on Mucociliary Clearance and Liquid Transport in Cystic Fibrosis
Source: PubMed Central journal article supplement (PMC4226497; doi:10.1371/journal.pone.0111972), 2014-11-10
Supplement: pone.0111972.s004.pdf [file pone.0111972.s004.pdf]

| Baseline      |        |
|---------------|--------|
| Filter Number | FFCA   |
| 1             | 1.13   |
| 2             | 3.117  |
| 3             | 50.664 |
| 4             | 22.817 |
| 5             | 32.405 |
| 6             | 31.776 |
| 7             | 1.668  |
| 8             | 10.115 |
| 9             | 41.487 |
| 10            | 26.114 |
| 11            | 9.762  |
| 12            | 13.921 |

| After First 10ul Addition |        |
|---------------------------|--------|
| Filter Number             | FFCA   |
| 1                         | 4.253  |
| 2                         | 27.988 |
| 3                         | 98.877 |
| 4                         | 77.022 |
| 5                         | 50.968 |
| 6                         | 71.512 |
| 7                         | 4.358  |
| 8                         | 21.571 |
| 9                         | 88.91  |
| 10                        | 86.051 |
| 11                        | 60.04  |
| 12                        | 79.626 |

| After Second 10ul Addition |        |
|----------------------------|--------|
| Filter Number              | FFCA   |
| 1                          | 7.885  |
| 2                          | 21.222 |
| 3                          | 88.943 |
| 4                          | 72.003 |
| 5                          | 66.111 |
| 6                          | 58.667 |
| 7                          | 9.212  |
| 8                          | 21.77  |
| 9                          | 62.135 |
| 10                         | 64.341 |
| 11                         | 42.305 |
| 12                         | 71.721 |
