# Supplementary material for: A Physiologically-Motivated Compartment-Based Model of the Effect of Inhaled Hypertonic Saline on Mucociliary Clearance and Liquid Transport in Cystic Fibrosis
Source: PubMed Central journal article supplement (PMC4226497; doi:10.1371/journal.pone.0111972), 2014-11-10
Supplement: pone.0111972.s005.pdf [file pone.0111972.s005.pdf]

Isotonic Saline Group

| Filter Number | Baseline FFCA | FFCA After IS |
|---------------|---------------|---------------|
| 1             | 43.18         | 51.633        |
| 2             | 40.381        | 47.851        |
| 3             | 39.138        | 39.228        |
| 4             | 39.017        | 53.317        |
| 5             | 35.673        | 51.96         |
| 6             | 37.548        | 47.271        |
| 13            | 1.909         | 4.377         |
| 14            | 0.797         | 3.419         |
| 15            | 7.444         | 8.873         |
| 16            | 1.786         | 9.343         |
| 17            | 0.603         | 9.295         |
| 18            | 0.451         | 3.549         |
| 25            | 36.196        | 13.856        |
| 26            | 33.154        | 31.062        |
| 27            | 35.36         | 35.569        |
| 28            | 34.054        | 38.593        |
| 29            | 31.39         | 33.417        |
| 30            | 32.619        | 40.89         |

Hypertonic Saline Group

| Filter Number | Baseline FFCA | FFCA After HS |
|---------------|---------------|---------------|
| 7             | 41.286        | 55.689        |
| 8             | 33.398        | 58.131        |
| 9             | 32.672        | 56.552        |
| 10            | 31.637        | 48.474        |
| 11            | 35.649        | 54.433        |
| 12            | 31.535        | 48.258        |
| 19            | 3.594         | 13.669        |
| 20            | 1.05          | 9.973         |
| 21            | 1.813         | 8.286         |
| 22            | 3.498         | 7.901         |
| 23            | 1.314         | 7.129         |
| 24            | 1.447         | 6.254         |
| 31            | 32.753        | 51.759        |
| 32            | 51.29         | 54.863        |
| 33            | 29.524        | 48.387        |
| 34            | 20.484        | 25.678        |
| 35            | 40.202        | 43.58         |
| 36            | 37.282        | 49.255        |
